# Supplementary material for: Synthesis of N′-(4-/3-/2-/Non-substituted benzylidene)-4-[(4-methylphenyl)sulfonyloxy] Benzohydrazides and Evaluation of Their Inhibitory Activities against Monoamine Oxidases and β-Secretase
Source: MDPI journal article supplement (doi:10.3390/app11135830), 2021-06-23
Supplement: s1 [file s1]

## SUPPLEMENTARY DATA

### Synthesis of *N'*-(4-/3-/2-/non-substituted benzylidene)-4-[(4-methylphenyl)sulfonyloxy] Benzohydrazides and Evaluation of their Inhibitory Activities against Monoamine Oxidases and $\beta$ -Secretase

Hasan Erdinç SELLITEPE <sup>1, #</sup>, Jong Min Oh <sup>2, #</sup>, İnci Selin DOĞAN <sup>1</sup>, Sercan YILDIRIM <sup>3</sup>, Ahmet Buğra AKSEL <sup>1</sup>, Geum Seok Jeong <sup>2</sup>, Ahamed Khames<sup>4</sup>, Mohamed A Abdelgawad<sup>5,6</sup>, Nicola Gambacorta<sup>7</sup>, Orazio Nicolotti<sup>7</sup>, Bijo Mathew <sup>8,\*</sup> and Hoon Kim <sup>2 \*</sup>

<sup>1</sup> Department of Pharmaceutical Chemistry, Faculty of Pharmacy, Karadeniz Technical University 61080, Turkey

<sup>2</sup> Department of Pharmacy, and Research Institute of Life Pharmaceutical Sciences, Suncheon National University, Suncheon 57922, Republic of Korea

<sup>3</sup> Department of Analytical Chemistry, Faculty of Pharmacy, Karadeniz Technical University 61080, Turkey

<sup>4</sup> Department of Pharmaceutics and Industrial Pharmacy, College of Pharmacy, Taif University, P.O. Box-11099, Taif-21944, Saudi Arabia

<sup>5</sup> Department of Pharmaceutical Chemistry, College of Pharmacy, Jouf University, Sakaka, Al Jouf 2014, Saudi Arabia

<sup>6</sup> Department of Pharmaceutical Organic Chemistry, Faculty of Pharmacy, Beni Suef University, Beni Suef 62514, Egypt

<sup>7</sup> Dipartimento di Farmacia—Scienze del Farmaco, Università degli Studi di Bari “Aldo Moro”, Via E. Orabona, 4, I-70125 Bari, Italy

<sup>8</sup> Department of Pharmaceutical Chemistry, Amrita School of Pharmacy, Amrita Vishwa Vidyapeetham, AIMS Health Sciences Campus, Kochi-682 041, India.

# Authors contributed equally

\* Correspondence: (hoon@sunchon.ac.kr) (H. Kim); (bijomathew@aims.amrita.edu; bijovilaventgu@gmail.com) (B. Mathew)

|                                                                                                       |    |
|-------------------------------------------------------------------------------------------------------|----|
| <b>Figure S1.</b> Compound <b>3a</b> <sup>1</sup> H-NMR spectrum (DMSO-d <sub>6</sub> , 400 MHz).     | 4  |
| <b>Figure S2.</b> Compound <b>3a</b> <sup>13</sup> C-NMR spectrum (DMSO-d <sub>6</sub> , 100 MHz).    | 5  |
| <b>Figure S3.</b> Compound <b>3a</b> ESI MS spectrum.                                                 | 5  |
| <b>Figure S4.</b> Chromatogram of compound <b>3a</b> (28 µg/mL) recorded under optimized conditions.  | 6  |
| <b>Figure S5.</b> Compound <b>3b</b> <sup>1</sup> H-NMR spectrum (DMSO-d <sub>6</sub> , 400 MHz).     | 6  |
| <b>Figure S6.</b> Compound <b>3b</b> <sup>13</sup> C-NMR spectrum (DMSO-d <sub>6</sub> , 100 MHz).    | 7  |
| <b>Figure S7.</b> Compound <b>3b</b> ESI MS spectrum.                                                 | 7  |
| <b>Figure S8.</b> Chromatogram of compound <b>3b</b> (52 µg/mL) recorded under optimized conditions.  | 8  |
| <b>Figure S9.</b> Compound <b>3c</b> <sup>1</sup> H-NMR spectrum (DMSO-d <sub>6</sub> , 400 MHz).     | 8  |
| <b>Figure S10.</b> Compound <b>3c</b> <sup>13</sup> C-NMR spectrum (DMSO-d <sub>6</sub> , 100 MHz).   | 9  |
| <b>Figure S11.</b> Compound <b>3c</b> ESI MS spectrum.                                                | 9  |
| <b>Figure S12.</b> Chromatogram of compound <b>3c</b> (24 µg/mL) recorded under optimized conditions. | 10 |
| <b>Figure S13.</b> Compound <b>3d</b> <sup>1</sup> H-NMR spectrum (DMSO-d <sub>6</sub> , 400 MHz).    | 10 |
| <b>Figure S14.</b> Compound <b>3d</b> <sup>13</sup> C-NMR spectrum (DMSO-d <sub>6</sub> , 100 MHz).   | 11 |
| <b>Figure S15.</b> Compound <b>3d</b> ESI MS spectrum.                                                | 11 |
| <b>Figure S16.</b> Chromatogram of compound <b>3d</b> (56 µg/mL) recorded under optimized conditions. | 12 |
| <b>Figure S17.</b> Compound <b>3e</b> <sup>1</sup> H-NMR spectrum (DMSO-d <sub>6</sub> , 400 MHz).    | 12 |
| <b>Figure S18.</b> Compound <b>3e</b> <sup>13</sup> C-NMR spectrum (DMSO-d <sub>6</sub> , 100 MHz).   | 13 |
| <b>Figure S19.</b> Compound <b>3e</b> ESI MS spectrum.                                                | 13 |
| <b>Figure S20.</b> Chromatogram of compound <b>3e</b> (28 µg/mL) recorded under optimized conditions. | 14 |
| <b>Figure S21.</b> Compound <b>3f</b> <sup>1</sup> H-NMR spectrum (DMSO-d <sub>6</sub> , 400 MHz).    | 14 |
| <b>Figure S22.</b> Compound <b>3f</b> <sup>13</sup> C-NMR spectrum (DMSO-d <sub>6</sub> , 100 MHz).   | 15 |
| <b>Figure S23.</b> Compound <b>3f</b> ESI MS spectrum.                                                | 15 |
| <b>Figure S24.</b> Chromatogram of compound <b>3f</b> (48 µg/mL) recorded under optimized conditions. | 16 |
| <b>Figure S25.</b> Compound <b>3g</b> <sup>1</sup> H-NMR spectrum (DMSO-d <sub>6</sub> , 400 MHz).    | 16 |
| <b>Figure S26.</b> Compound <b>3g</b> <sup>13</sup> C-NMR spectrum (DMSO-d <sub>6</sub> , 100 MHz).   | 17 |
| <b>Figure S27.</b> Compound <b>3g</b> ESI MS spectrum.                                                | 17 |
| <b>Figure S28.</b> Chromatogram of compound <b>3g</b> (40 µg/mL) recorded under optimized conditions. | 18 |
| <b>Figure S29.</b> Compound <b>3h</b> <sup>1</sup> H-NMR spectrum (DMSO-d <sub>6</sub> , 400 MHz).    | 18 |
| <b>Figure S30.</b> Compound <b>3h</b> <sup>13</sup> C-NMR spectrum (DMSO-d <sub>6</sub> , 100 MHz).   | 19 |
| <b>Figure S31.</b> Compound <b>3h</b> ESI MS spectrum.                                                | 19 |
| <b>Figure S32.</b> Chromatogram of compound <b>3h</b> (28 µg/mL) recorded under optimized conditions. | 20 |
| <b>Figure S33.</b> Compound <b>3i</b> <sup>1</sup> H-NMR spectrum (DMSO-d <sub>6</sub> , 400 MHz).    | 20 |
| <b>Figure S34.</b> Compound <b>3i</b> <sup>13</sup> C-NMR spectrum (DMSO-d <sub>6</sub> , 100 MHz).   | 21 |
| <b>Figure S35.</b> Compound <b>3i</b> ESI MS spectrum.                                                | 21 |
| <b>Figure S36.</b> Chromatogram of compound <b>3i</b> (28 µg/mL) recorded under optimized conditions. | 22 |
| <b>Figure S37.</b> Compound <b>3j</b> <sup>1</sup> H-NMR spectrum (DMSO-d <sub>6</sub> , 400 MHz).    | 22 |
| <b>Figure S38.</b> Compound <b>3j</b> <sup>13</sup> C-NMR spectrum (DMSO-d <sub>6</sub> , 100 MHz).   | 23 |
| <b>Figure S39.</b> Compound <b>3j</b> ESI MS spectrum.                                                | 23 |
| <b>Figure S40.</b> Chromatogram of compound <b>3j</b> (44 µg/mL) recorded under optimized conditions. | 24 |
| <b>Figure S41.</b> Compound <b>3k</b> <sup>1</sup> H-NMR spectrum (DMSO-d <sub>6</sub> , 400 MHz).    | 24 |

|                                                                                                                        |    |
|------------------------------------------------------------------------------------------------------------------------|----|
| <b>Figure S42.</b> Compound <b>3k</b> $^{13}\text{C}$ -NMR spectrum (DMSO- $\text{d}_6$ , 100 MHz).....                | 25 |
| <b>Figure S43.</b> Compound <b>3k</b> ESI MS spectrum. ....                                                            | 25 |
| <b>Figure S44.</b> Chromatogram of compound <b>3k</b> (56 $\mu\text{g/mL}$ ) recorded under optimized conditions. .... | 26 |
| <b>Figure S45.</b> Compound <b>3l</b> $^1\text{H}$ -NMR spectrum (DMSO- $\text{d}_6$ , 400 MHz). ....                  | 26 |
| <b>Figure S46.</b> Compound <b>3l</b> $^{13}\text{C}$ -NMR spectrum (DMSO- $\text{d}_6$ , 100 MHz). ....               | 27 |
| <b>Figure S47.</b> Compound <b>3l</b> ESI MS spectrum. ....                                                            | 27 |
| <b>Figure S48.</b> Chromatogram of compound <b>3l</b> (64 $\mu\text{g/mL}$ ) recorded under optimized conditions. .... | 28 |
| <b>Figure S49.</b> Compound <b>3m</b> $^1\text{H}$ -NMR spectrum (DMSO- $\text{d}_6$ , 400 MHz). ....                  | 28 |
| <b>Figure S50.</b> Compound <b>3m</b> $^{13}\text{C}$ -NMR spectrum (DMSO- $\text{d}_6$ , 100 MHz). ....               | 29 |
| <b>Figure S51.</b> Compound <b>3m</b> ESI MS spectrum. ....                                                            | 29 |
| <b>Figure S52.</b> Chromatogram of compound <b>3m</b> (40 $\mu\text{g/mL}$ ) recorded under optimized conditions. .... | 30 |
| <b>Figure S53.</b> Compound <b>3n</b> $^1\text{H}$ -NMR spectrum (DMSO- $\text{d}_6$ , 400 MHz). ....                  | 30 |
| <b>Figure S54.</b> Compound <b>3n</b> $^{13}\text{C}$ -NMR spectrum (DMSO- $\text{d}_6$ , 100 MHz). ....               | 31 |
| <b>Figure S55.</b> Compound <b>3n</b> ESI MS spectrum. ....                                                            | 31 |
| <b>Figure S56.</b> Chromatogram of compound <b>3n</b> (36 $\mu\text{g/mL}$ ) recorded under optimized conditions. .... | 32 |
| <b>Figure S57.</b> Compound <b>3o</b> $^1\text{H}$ -NMR spectrum (DMSO- $\text{d}_6$ , 400 MHz). ....                  | 32 |
| <b>Figure S58.</b> Compound <b>3o</b> $^{13}\text{C}$ -NMR spectrum (DMSO- $\text{d}_6$ , 100 MHz). ....               | 33 |
| <b>Figure S59.</b> Compound <b>3o</b> ESI MS spectrum. ....                                                            | 33 |
| <b>Figure S60.</b> Chromatogram of compound <b>3o</b> (52 $\mu\text{g/mL}$ ) recorded under optimized conditions. .... | 34 |
| <b>Figure S61.</b> Compound <b>3p</b> $^1\text{H}$ -NMR spectrum (DMSO- $\text{d}_6$ , 400 MHz). ....                  | 34 |
| <b>Figure S62.</b> Compound <b>3p</b> $^{13}\text{C}$ -NMR spectrum (DMSO- $\text{d}_6$ , 100 MHz). ....               | 35 |
| <b>Figure S63.</b> Compound <b>3p</b> ESI MS spectrum. ....                                                            | 35 |
| <b>Figure S64.</b> Chromatogram of compound <b>3p</b> (36 $\mu\text{g/mL}$ ) recorded under optimized conditions. .... | 36 |
| <b>Figure S65.</b> Compound <b>3r</b> $^1\text{H}$ -NMR spectrum (DMSO- $\text{d}_6$ , 400 MHz). ....                  | 36 |
| <b>Figure S66.</b> Compound <b>3r</b> $^{13}\text{C}$ -NMR spectrum (DMSO- $\text{d}_6$ , 100 MHz). ....               | 37 |
| <b>Figure S67.</b> Compound <b>3r</b> ESI MS spectrum. ....                                                            | 37 |
| <b>Figure S68.</b> Chromatogram of compound <b>3r</b> (44 $\mu\text{g/mL}$ ) recorded under optimized conditions. .... | 38 |
| <b>Figure S69.</b> Compound <b>3s</b> $^1\text{H}$ -NMR spectrum (DMSO- $\text{d}_6$ , 400 MHz). ....                  | 38 |
| <b>Figure S70.</b> Compound <b>3s</b> $^{13}\text{C}$ -NMR spectrum (DMSO- $\text{d}_6$ , 100 MHz). ....               | 39 |
| <b>Figure S71.</b> Compound <b>3s</b> ESI MS spectrum. ....                                                            | 39 |
| <b>Figure S72.</b> Chromatogram of compound <b>3s</b> (32 $\mu\text{g/mL}$ ) recorded under optimized conditions. .... | 40 |
| <b>Figure S73.</b> Compound <b>3t</b> $^1\text{H}$ -NMR spectrum (DMSO- $\text{d}_6$ , 400 MHz). ....                  | 40 |
| <b>Figure S74.</b> Compound <b>3t</b> $^{13}\text{C}$ -NMR spectrum (DMSO- $\text{d}_6$ , 100 MHz). ....               | 41 |
| <b>Figure S75.</b> Compound <b>3t</b> ESI MS spectrum. ....                                                            | 41 |
| <b>Figure S76.</b> Chromatogram of compound <b>3t</b> (36 $\mu\text{g/mL}$ ) recorded under optimized conditions. .... | 42 |

(*E*)-*N'*-(Phenylmethylidene)-4-[(4-methylphenyl)sulfonyloxy]benzohydrazide (**3a**)

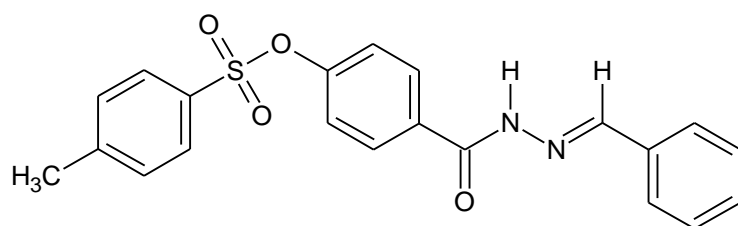

Lab Code: EP-T-H

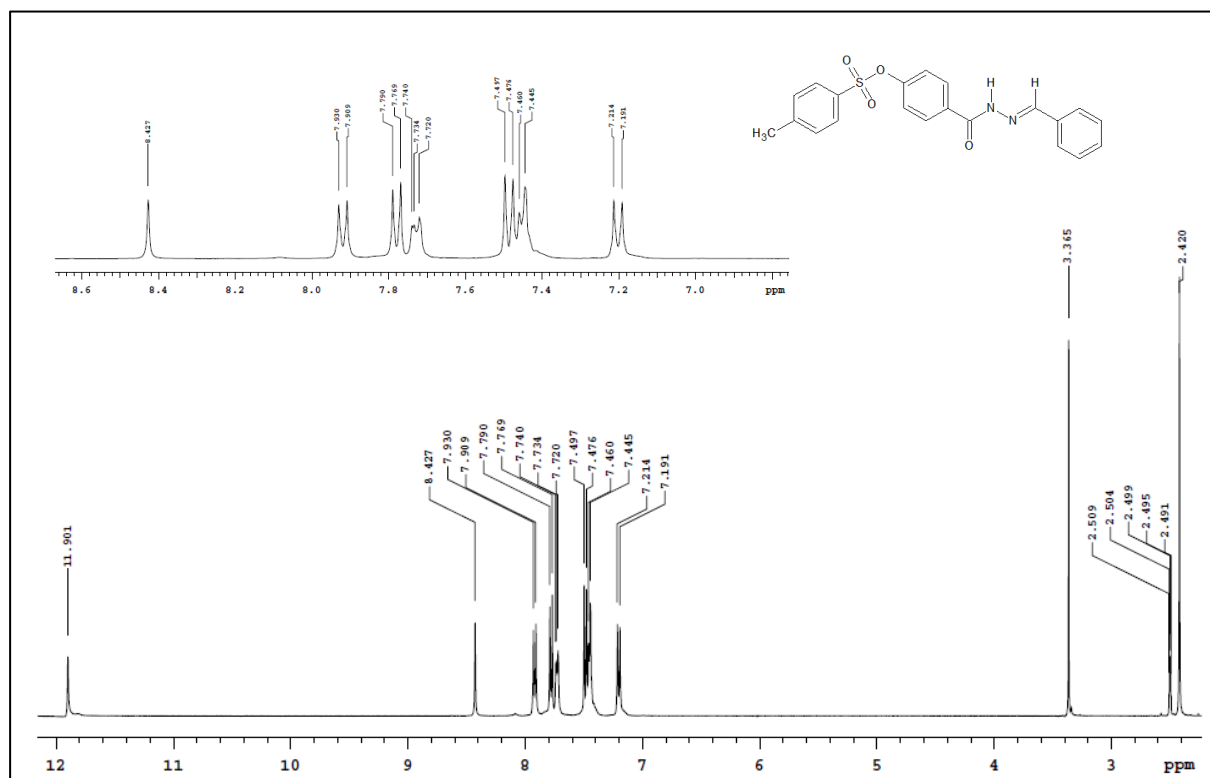

Figure S1. Compound **3a** <sup>1</sup>H-NMR spectrum (DMSO-d<sub>6</sub>, 400 MHz).

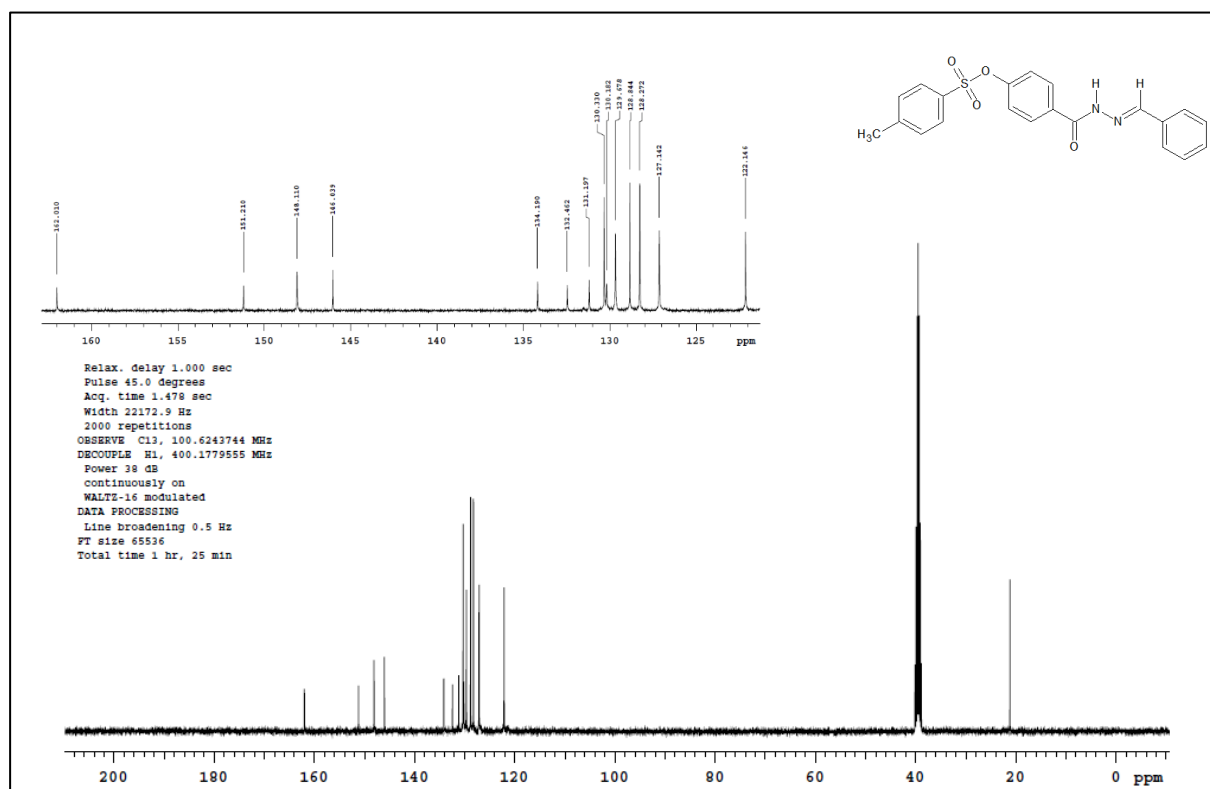

**Figure S2.** Compound **3a** <sup>13</sup>C-NMR spectrum (DMSO-d<sub>6</sub>, 100 MHz).

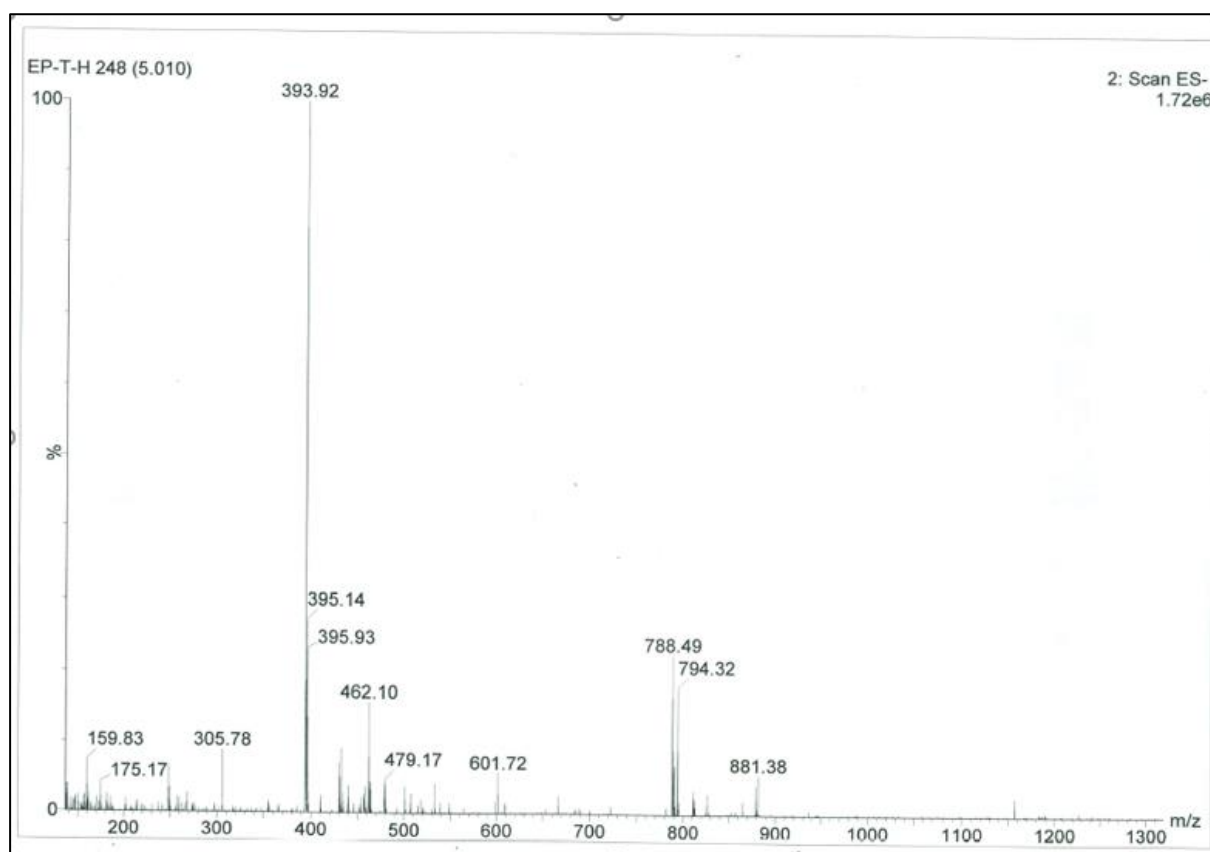

**Figure S3.** Compound **3a** ESI MS spectrum.

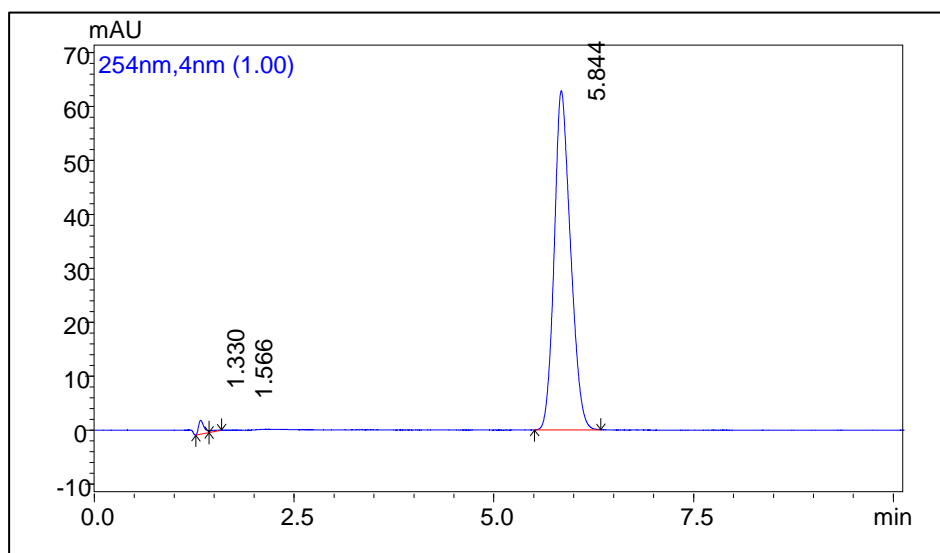

**Figure S4.** Chromatogram of compound **3a** (28  $\mu\text{g/mL}$ ) recorded under optimized conditions.

(*E*)-*N'*-[(2-Methylphenyl)methylidene]-4-[(4-methylphenyl)sulfonyloxy]benzohydrazide (**3b**)

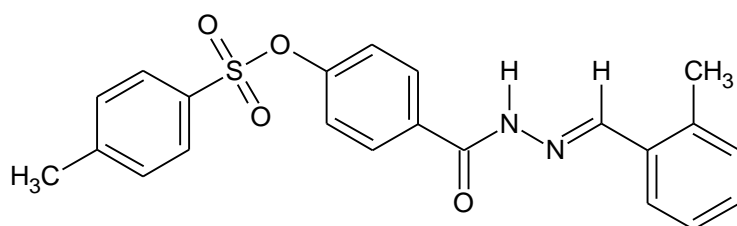

**Lab Code:** EP-T-2M

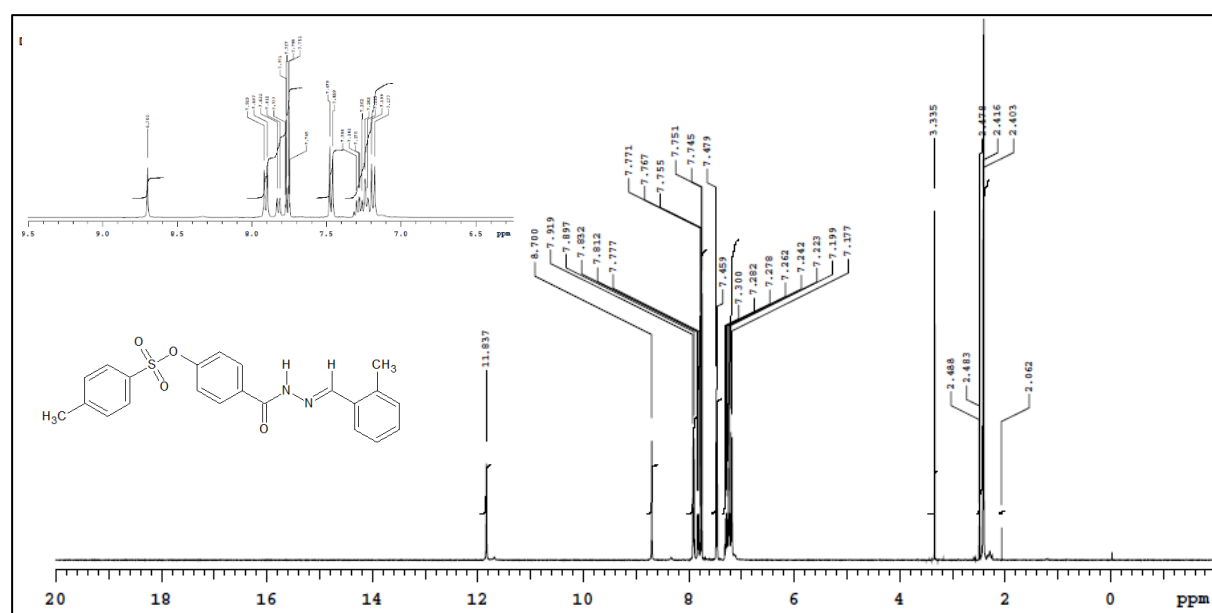

**Figure S5.** Compound **3b**  $^1\text{H}$ -NMR spectrum (DMSO- $d_6$ , 400 MHz).

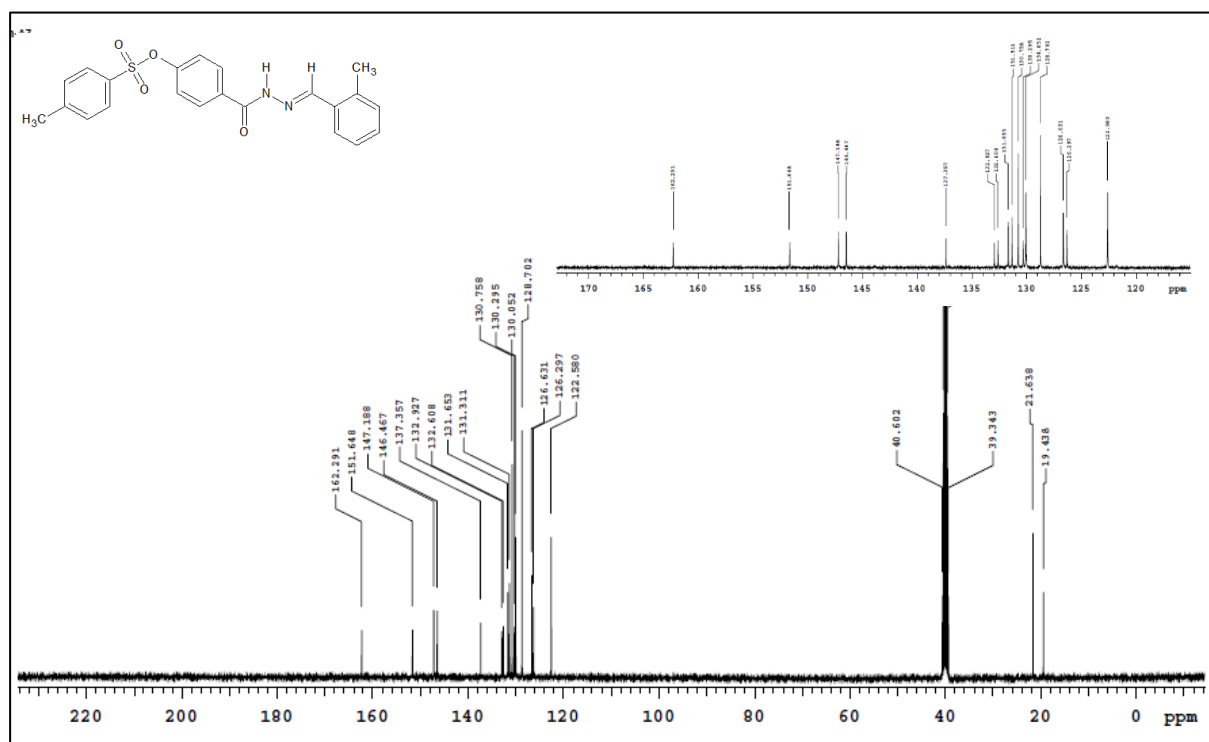

**Figure S6.** Compound **3b** <sup>13</sup>C-NMR spectrum (DMSO-d<sub>6</sub>, 100 MHz).

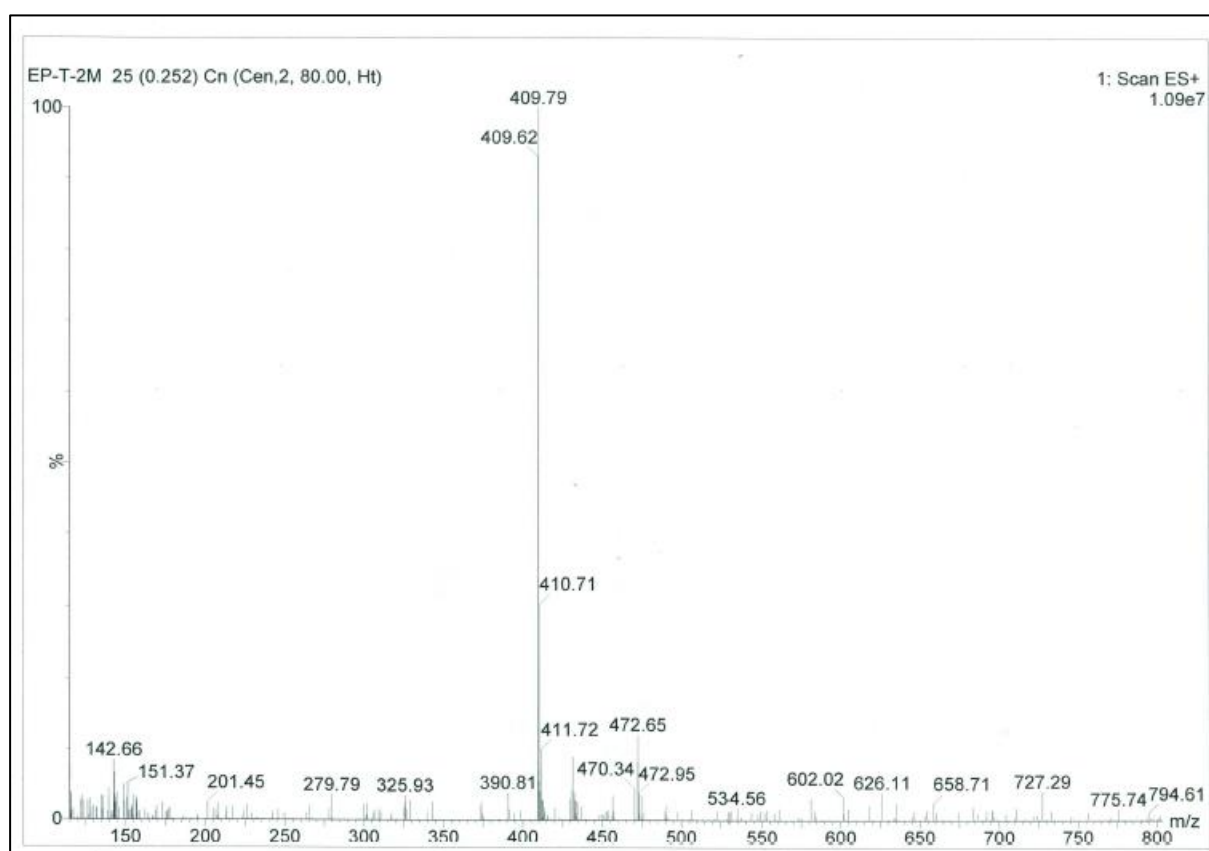

**Figure S7.** Compound **3b** ESI MS spectrum.

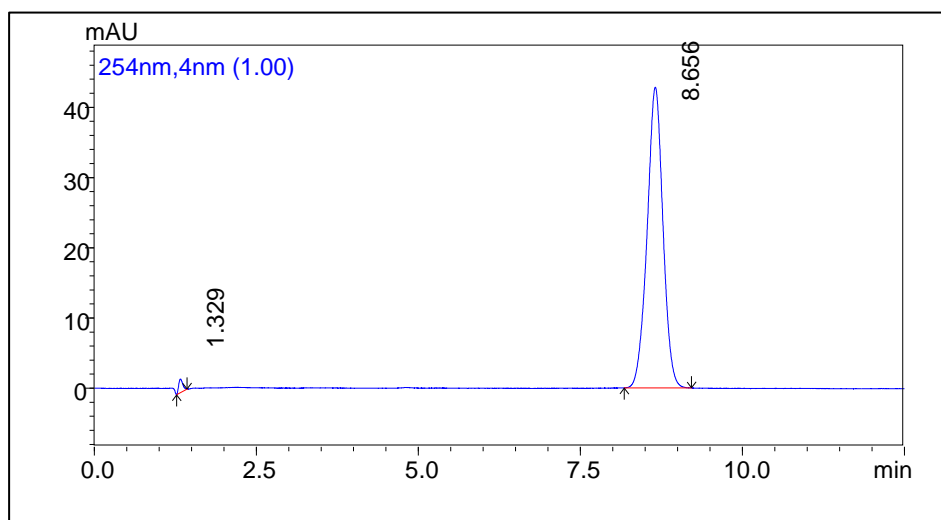

**Figure S8.** Chromatogram of compound **3b** (52  $\mu\text{g/mL}$ ) recorded under optimized conditions.

(*E*)-*N'*-[(3-Methylphenyl)methylidene]-4-[(4-methylphenyl)sulfonyloxy]benzohydrazide (**3c**)

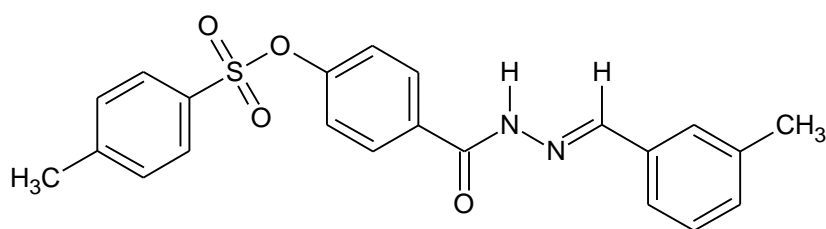

**Lab Code:** EP-T-3M

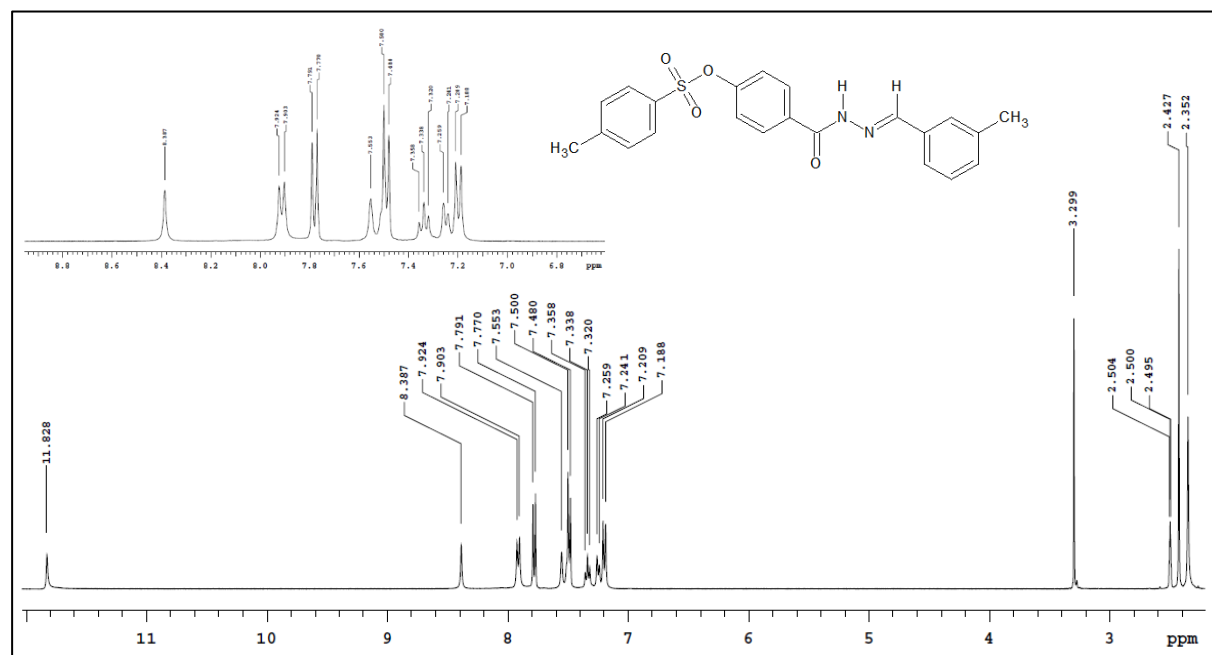

**Figure S9.** Compound **3c**  $^1\text{H}$ -NMR spectrum (DMSO- $d_6$ , 400 MHz).



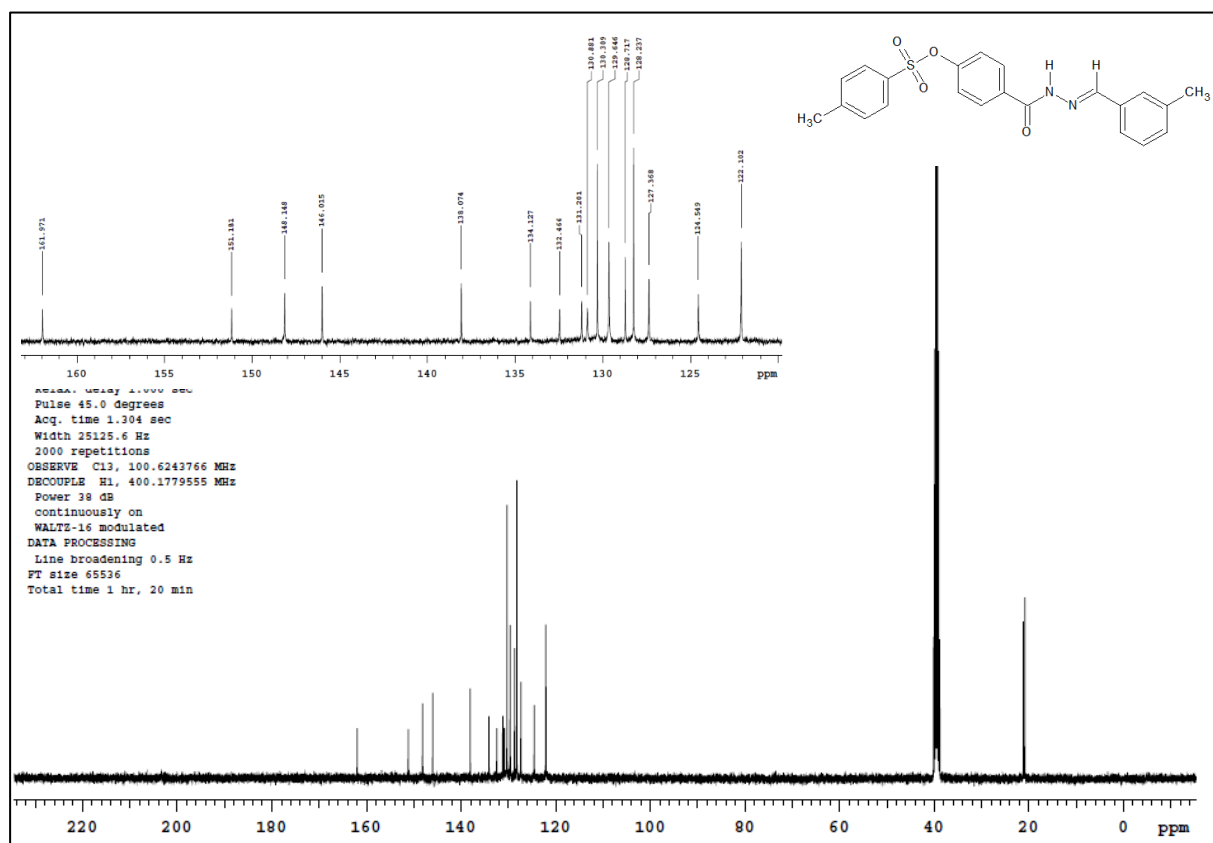

**Figure S10.** Compound **3c** <sup>13</sup>C-NMR spectrum (DMSO-d<sub>6</sub>, 100 MHz).

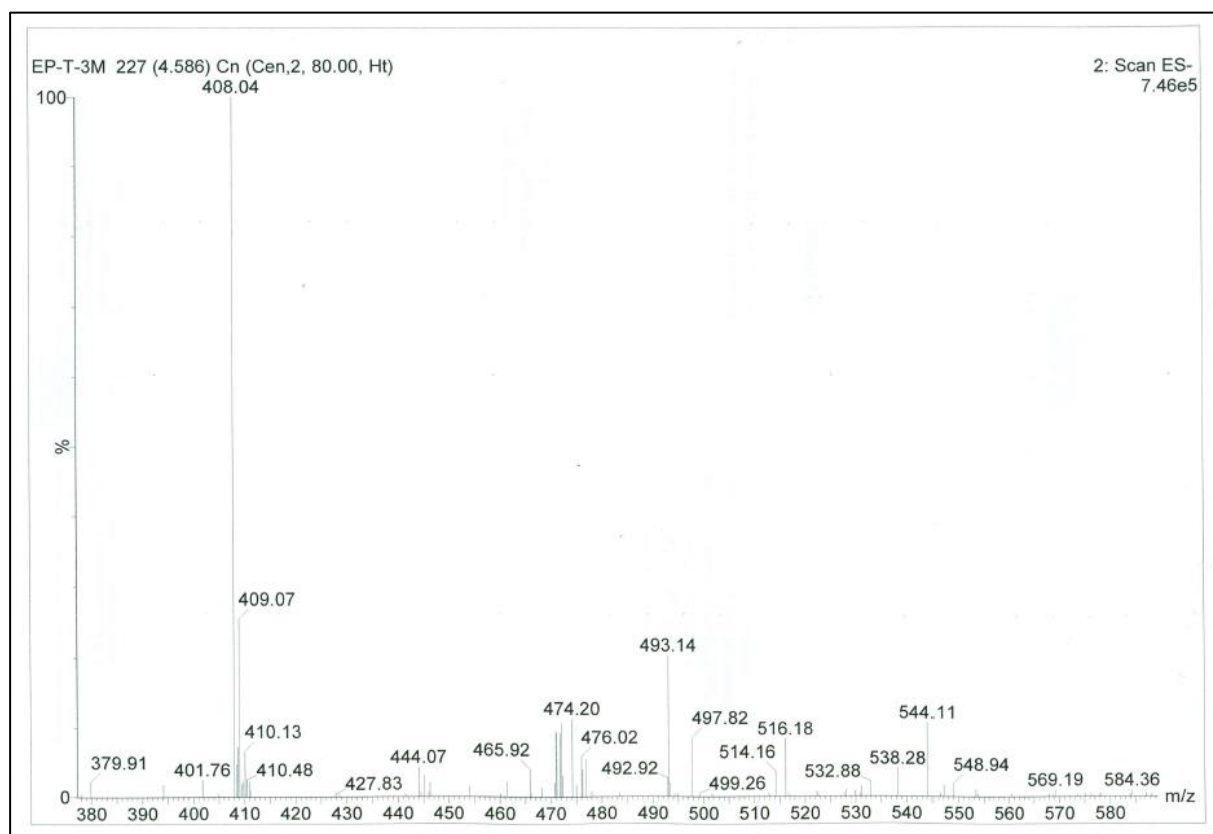

**Figure S11.** Compound **3c** ESI MS spectrum.

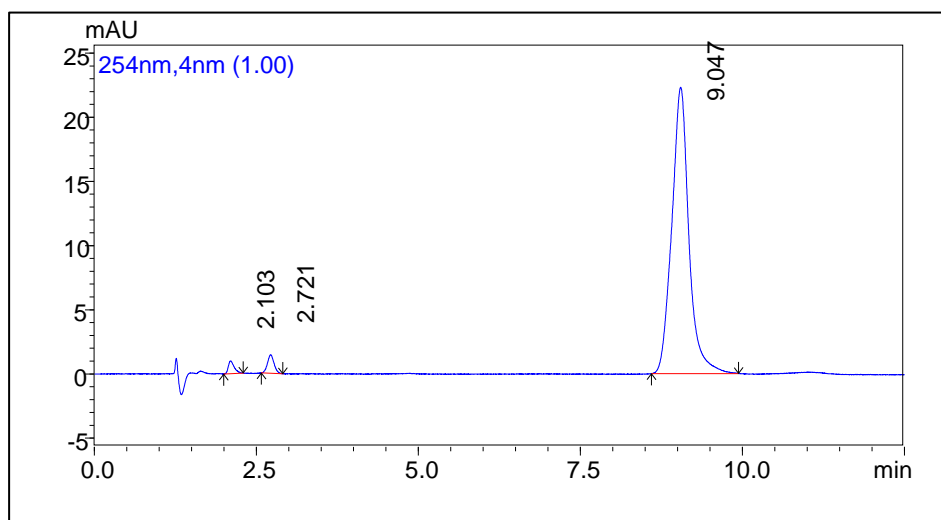

**Figure S12.** Chromatogram of compound 3c (24 µg/mL) recorded under optimized conditions.

(*E*)-*N*'-[(4-Methylphenyl)methylidene]-4-[(4-methylphenyl)sulfonyloxy]benzohydrazide (**3d**)

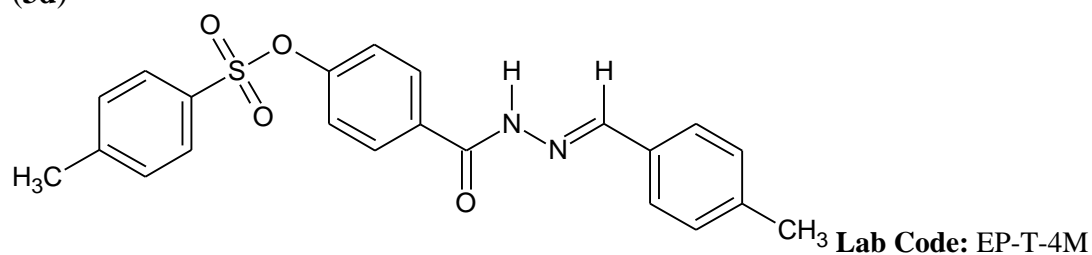

Lab Code: EP-T-4M

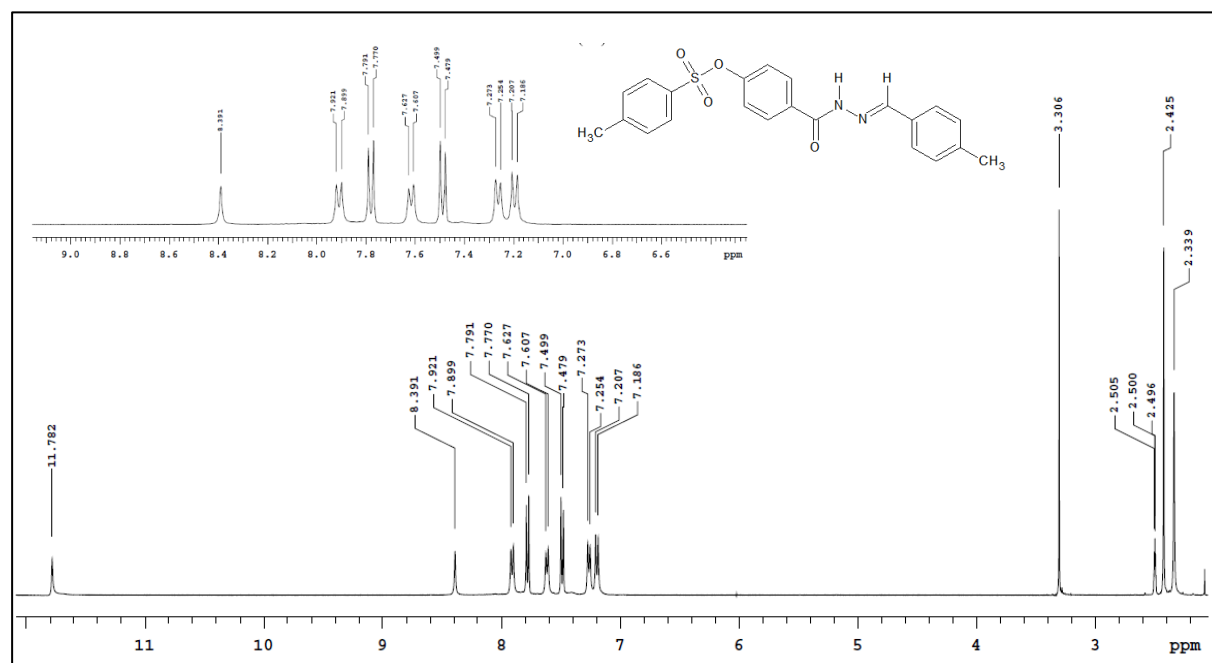

**Figure S13.** Compound 3d <sup>1</sup>H-NMR spectrum (DMSO-*d*<sub>6</sub>, 400 MHz).

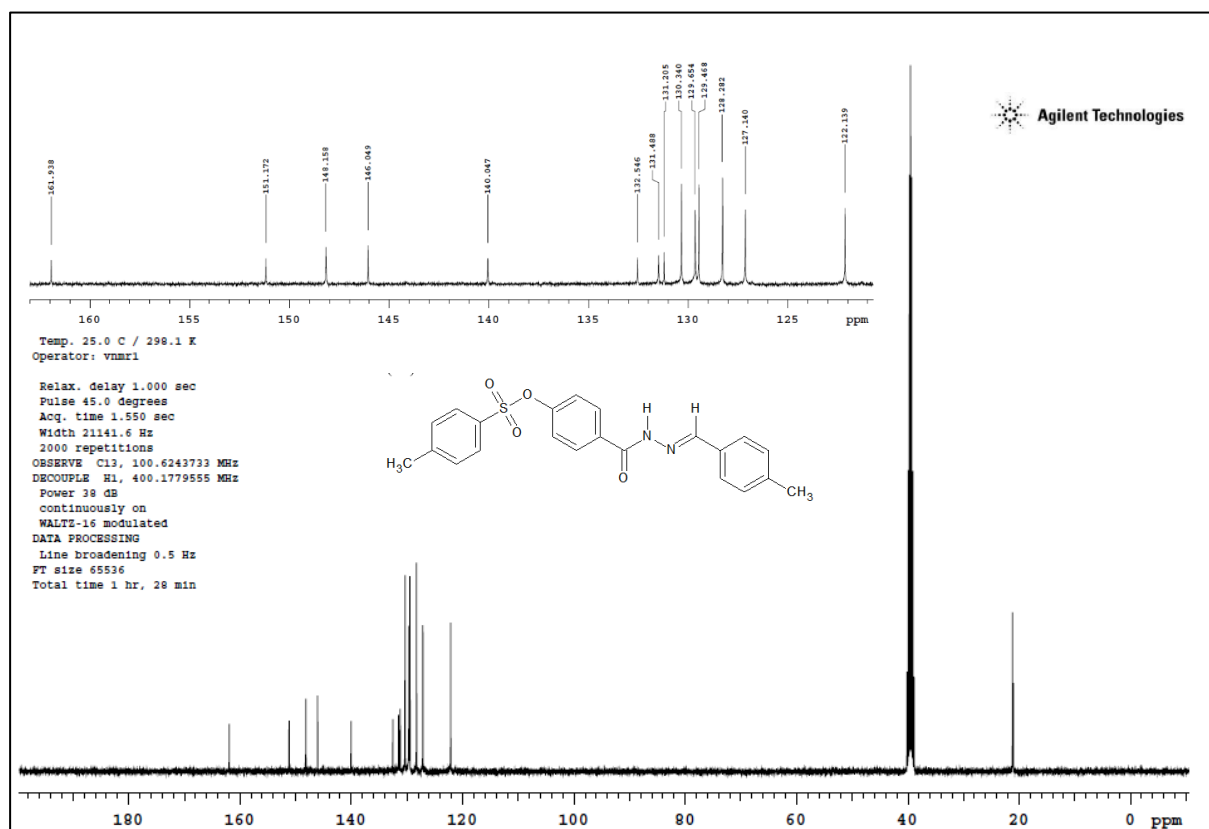

**Figure S14.** Compound **3d**  $^{13}\text{C}$ -NMR spectrum (DMSO- $\text{d}_6$ , 100 MHz).

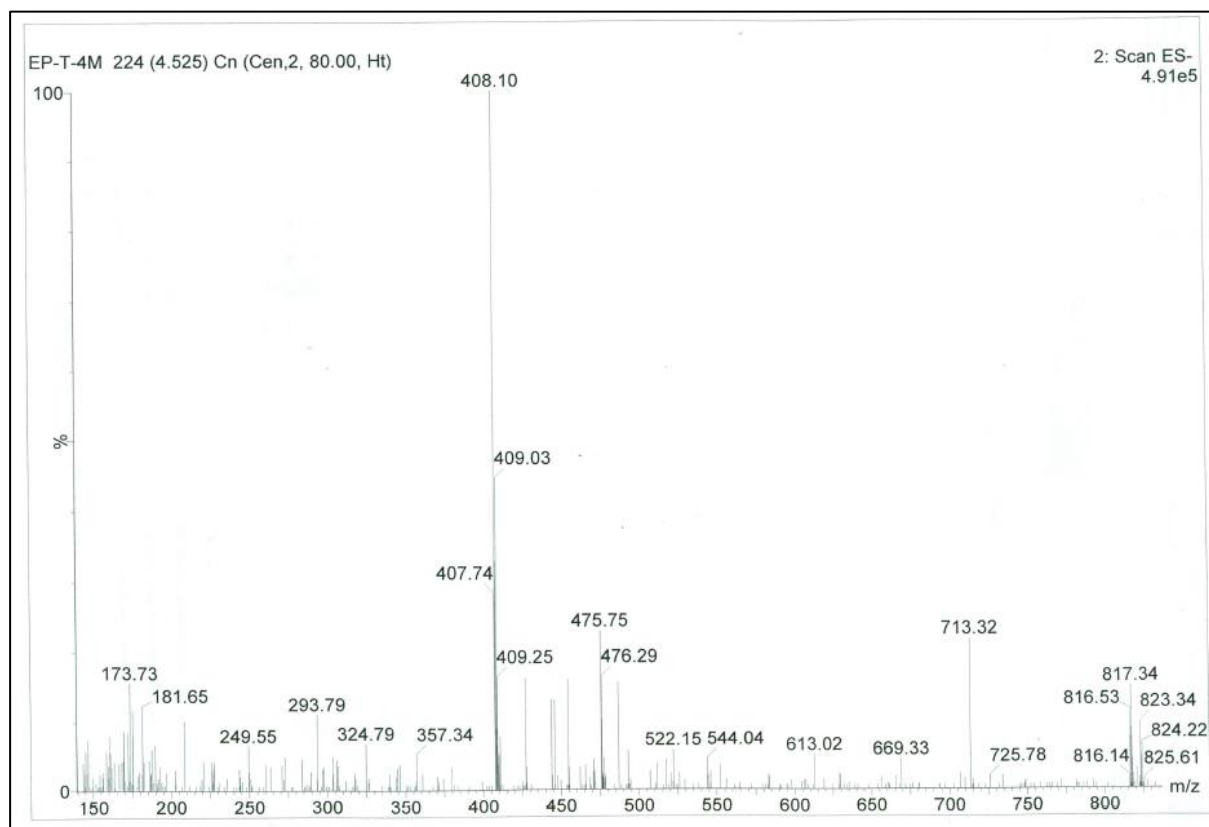

**Figure S15.** Compound **3d** ESI MS spectrum.

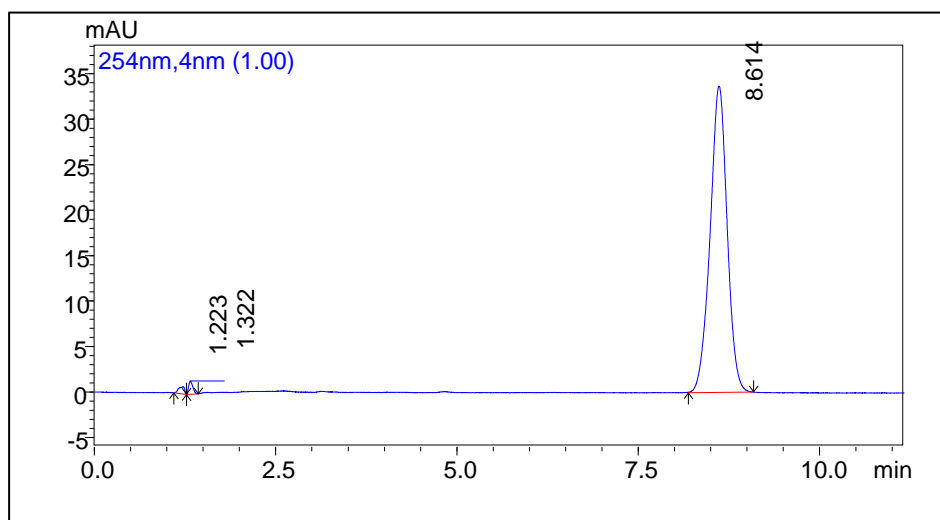

**Figure S16.** Chromatogram of compound **3d** (56 µg/mL) recorded under optimized conditions.

(*E*)-*N*'-[(2-Methoxyphenyl)methylidene]-4-[(4-methylphenyl)sulfonyloxy]benzohydrazide (**3e**)

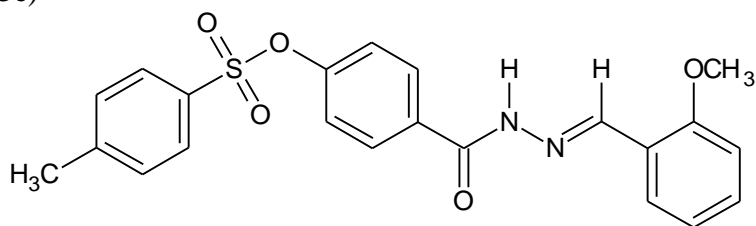

Lab Code: EP-T-20

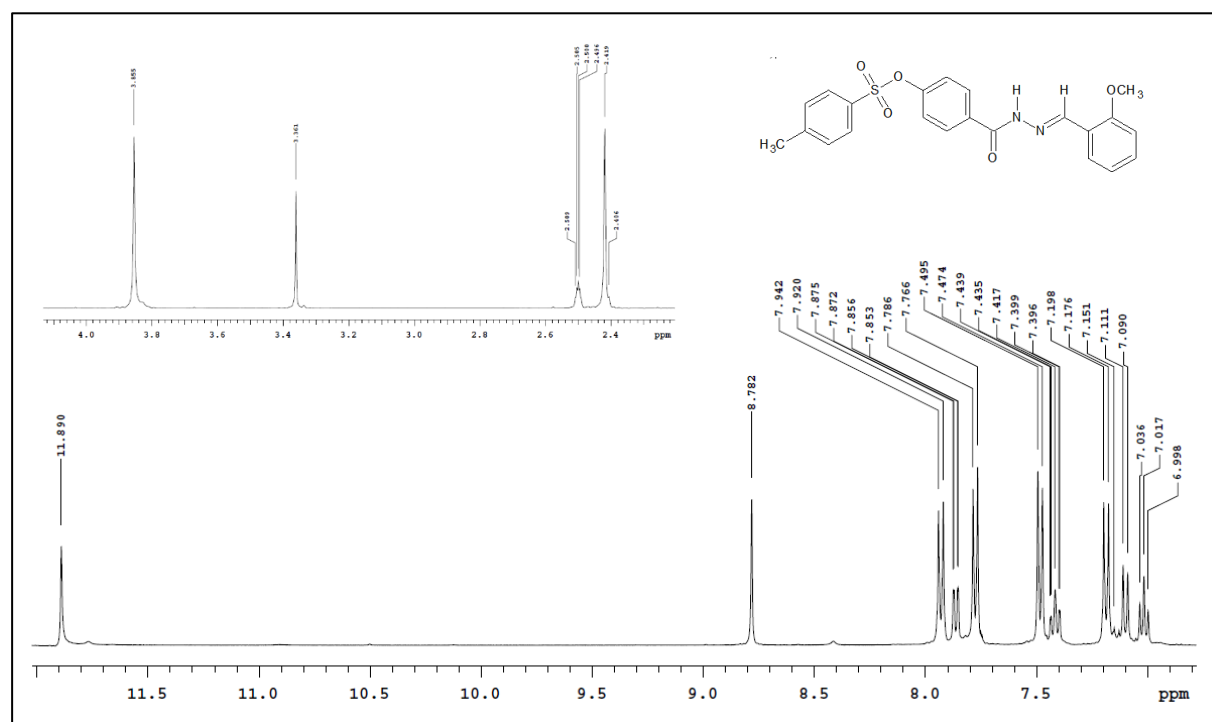

**Figure S17.** Compound **3e** <sup>1</sup>H-NMR spectrum (DMSO-*d*<sub>6</sub>, 400 MHz).

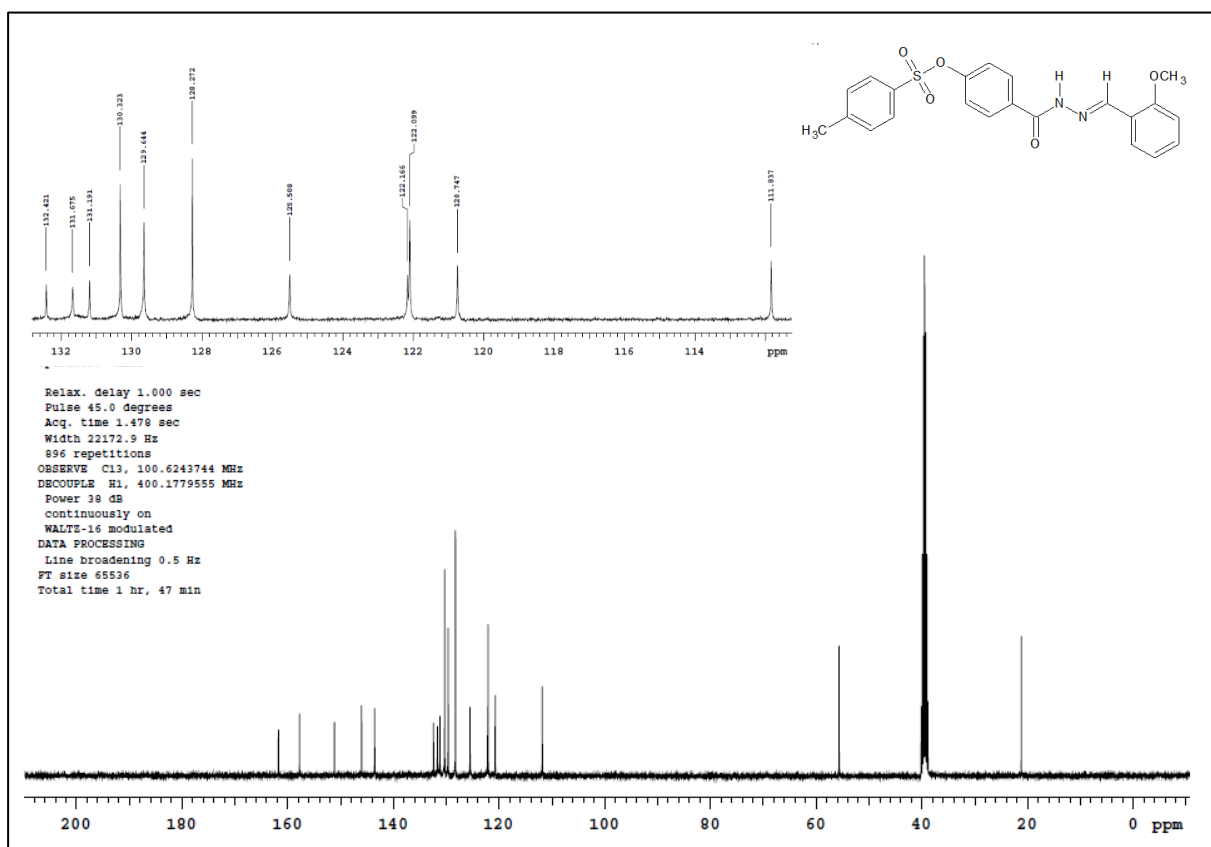

**Figure S18.** Compound **3e** <sup>13</sup>C-NMR spectrum (DMSO-d<sub>6</sub>, 100 MHz).

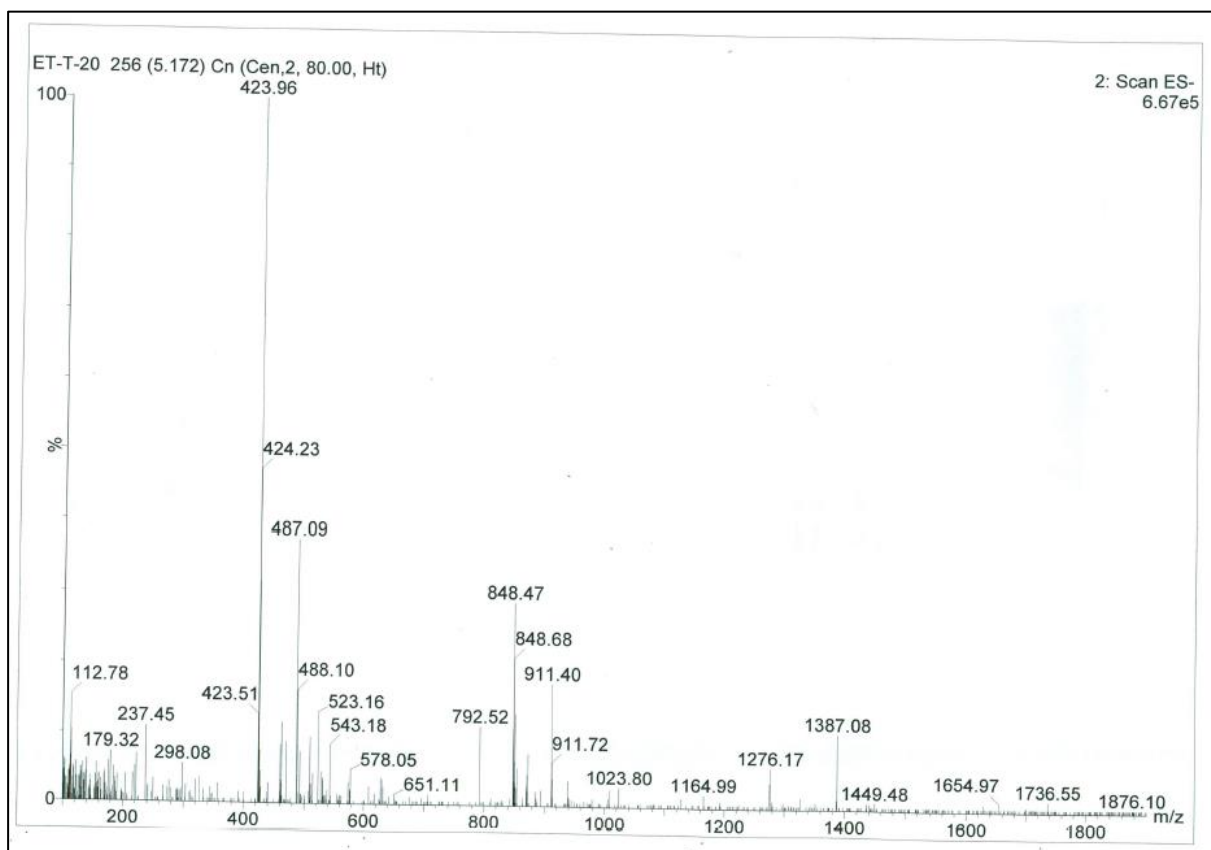

**Figure S19.** Compound **3e** ESI MS spectrum.

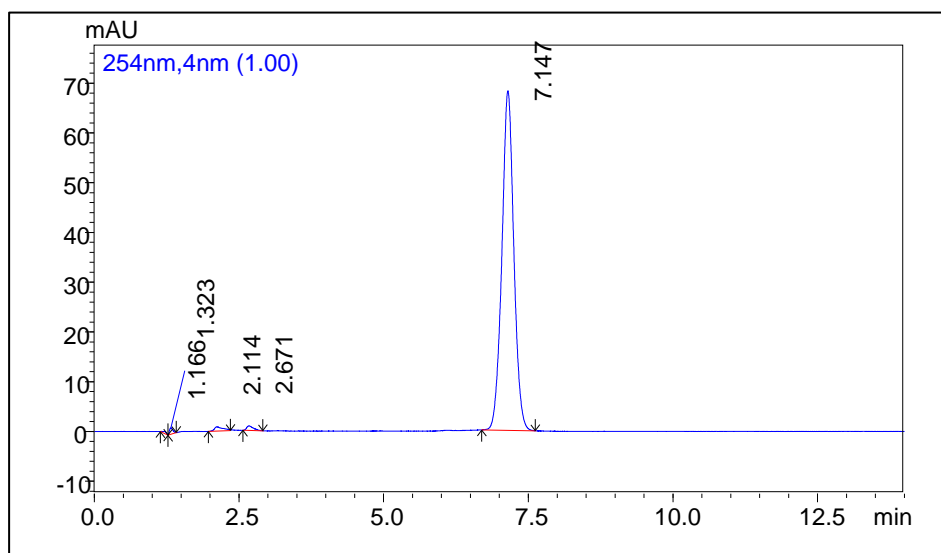

**Figure S20.** Chromatogram of compound **3e** (28 µg/mL) recorded under optimized conditions.

(*E*)-*N'*-[(3-Methoxyphenyl)methylidene]-4-[(4-methylphenyl)sulfonyloxy]benzohydrazide (**3f**)

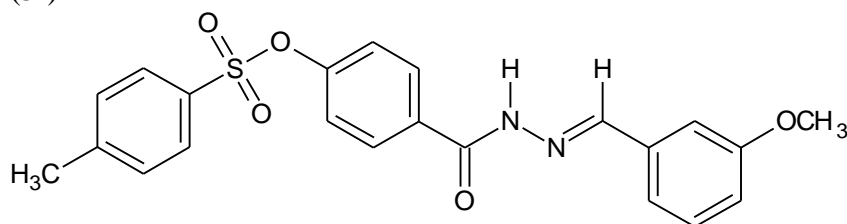

Lab Code: EP-T-30

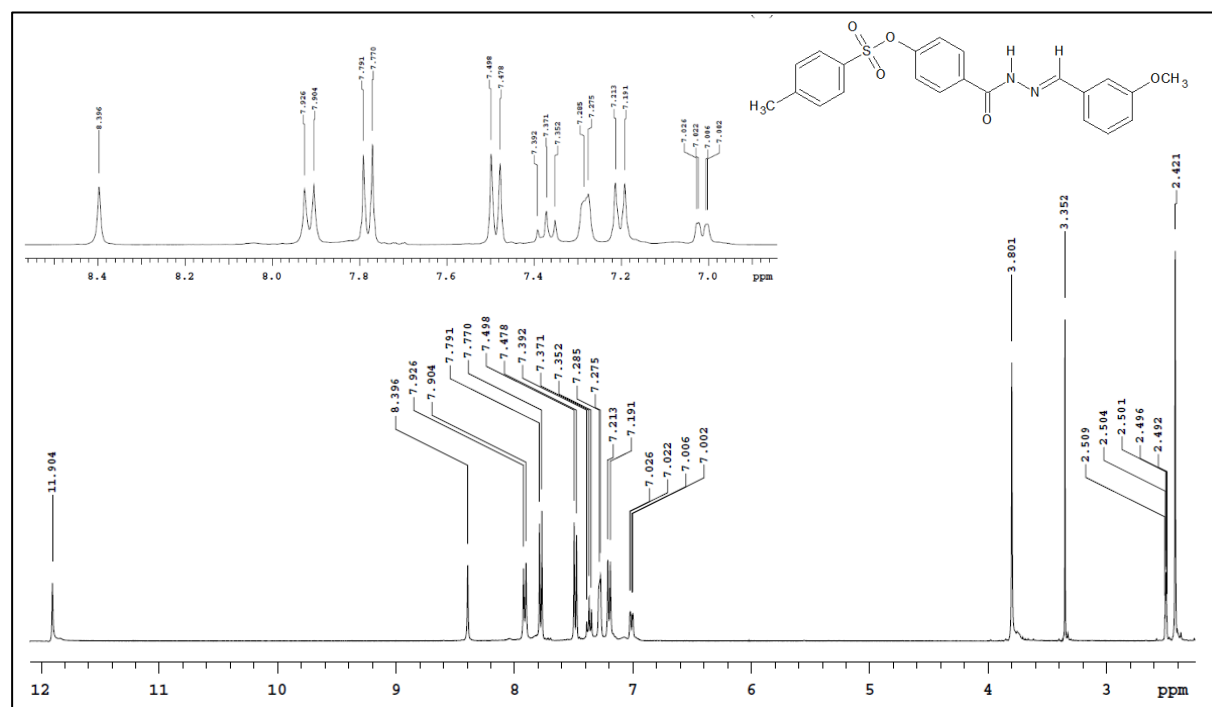

**Figure S21.** Compound **3f** <sup>1</sup>H-NMR spectrum (DMSO-*d*<sub>6</sub>, 400 MHz).

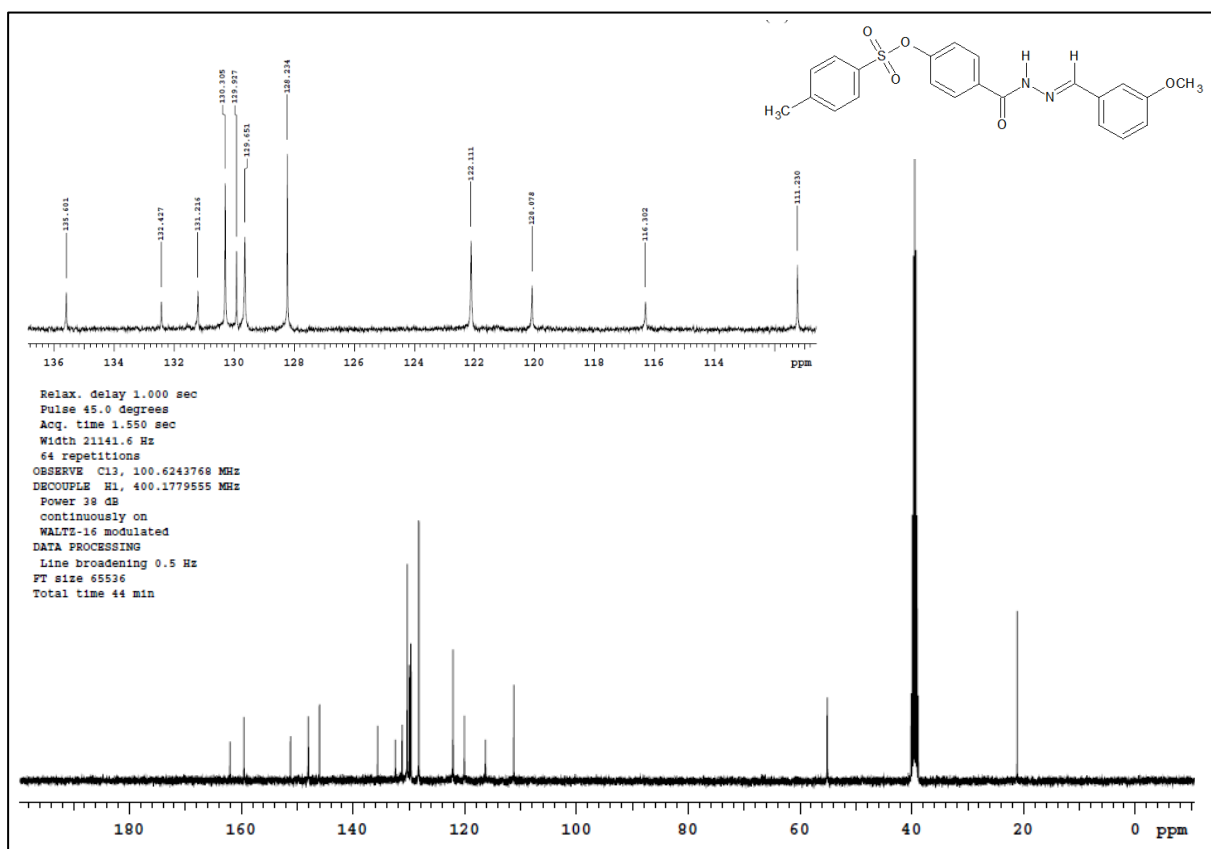

**Figure S22.** Compound **3f** <sup>13</sup>C-NMR spectrum (DMSO-d<sub>6</sub>, 100 MHz).

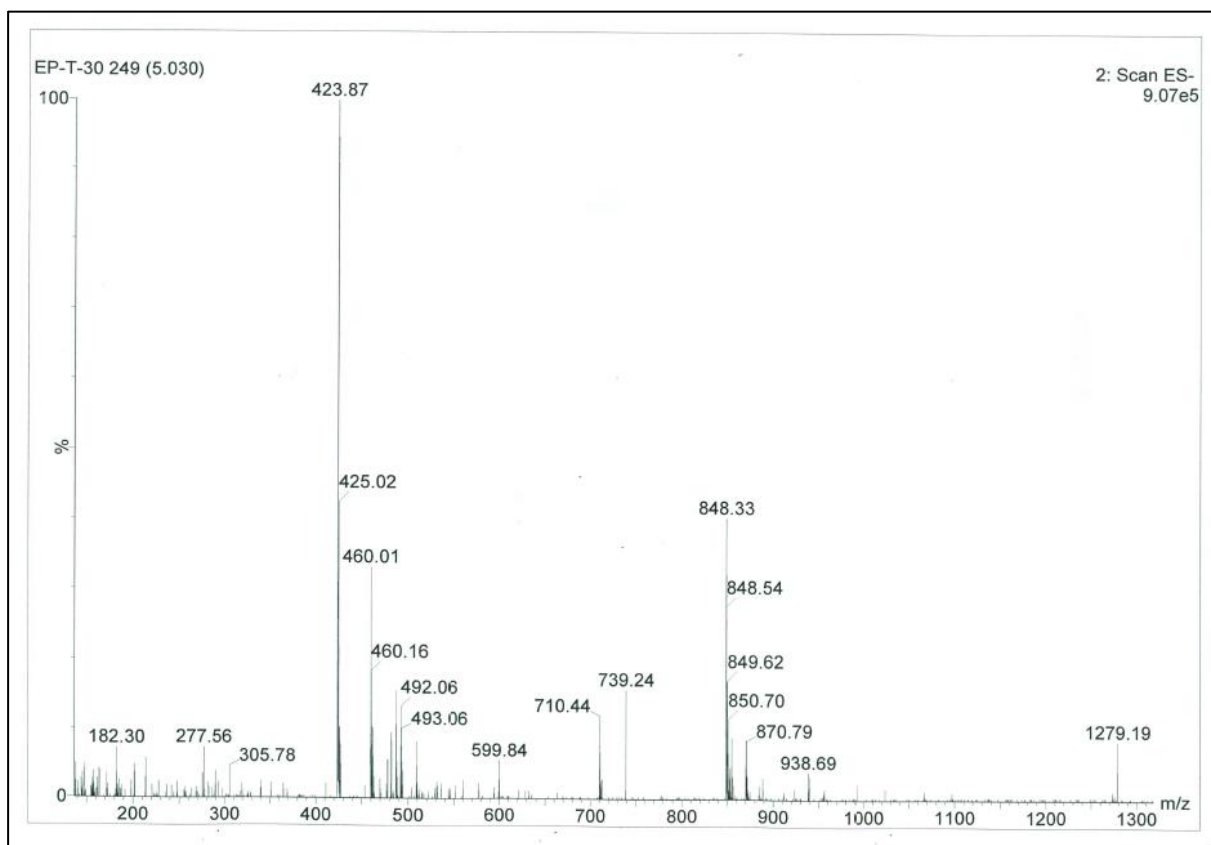

**Figure S23.** Compound **3f** ESI MS spectrum.

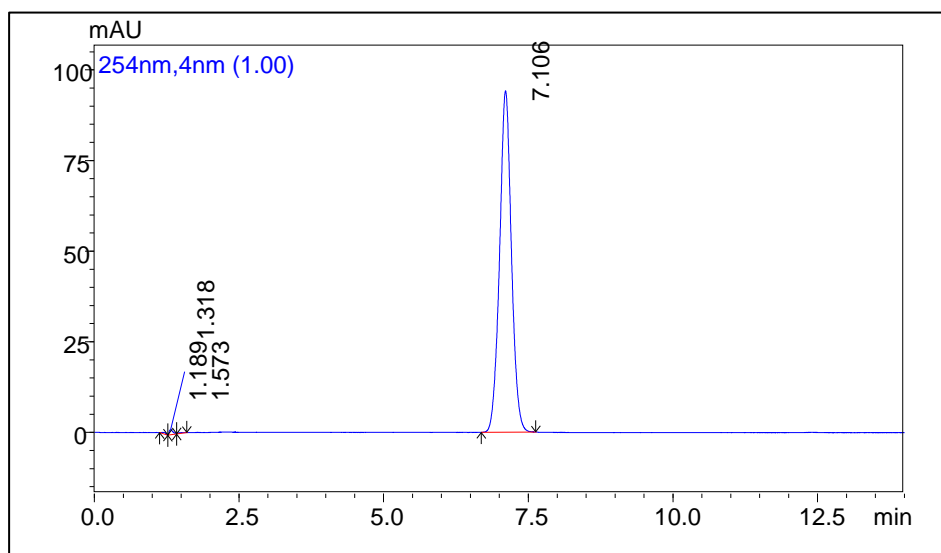

**Figure S24.** Chromatogram of compound **3f** (48 µg/mL) recorded under optimized conditions.

(*E*)-*N'*-[(4-Methoxyphenyl)methylidene]-4-[(4-methylphenyl)sulfonyloxy]benzohydrazide (**3g**)

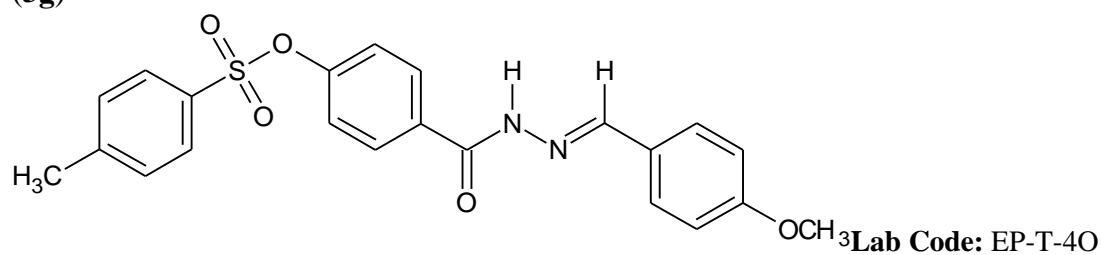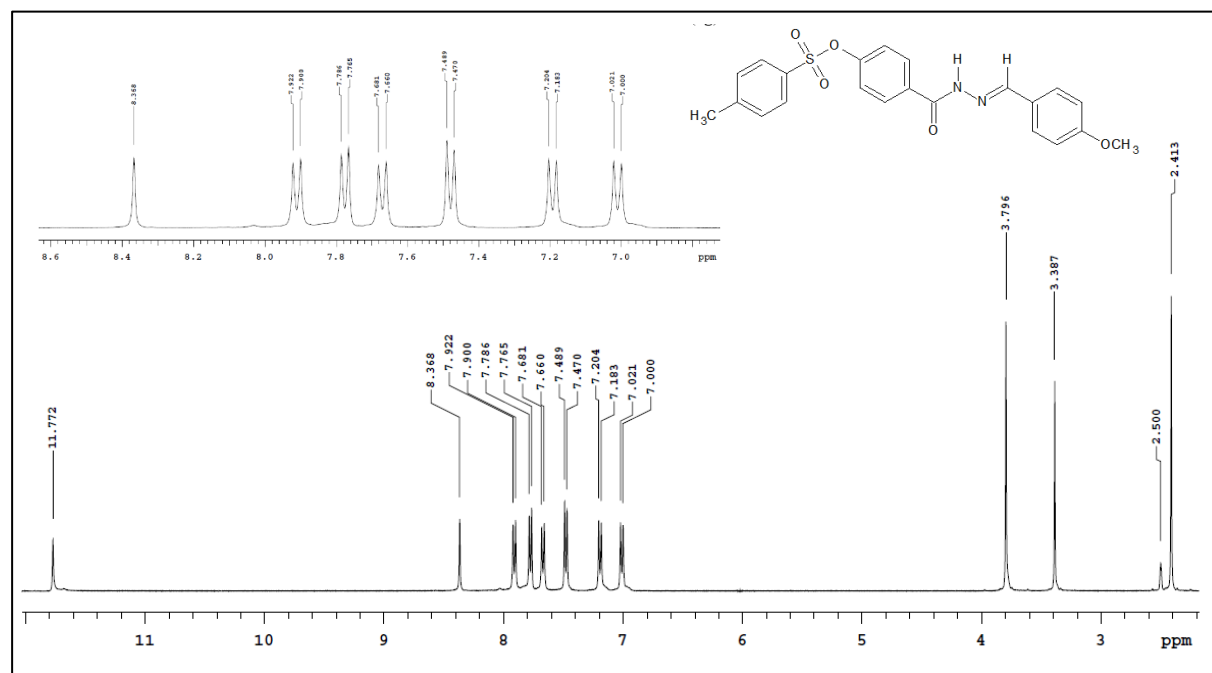

**Figure S25.** Compound **3g** <sup>1</sup>H-NMR spectrum (DMSO-*d*<sub>6</sub>, 400 MHz).



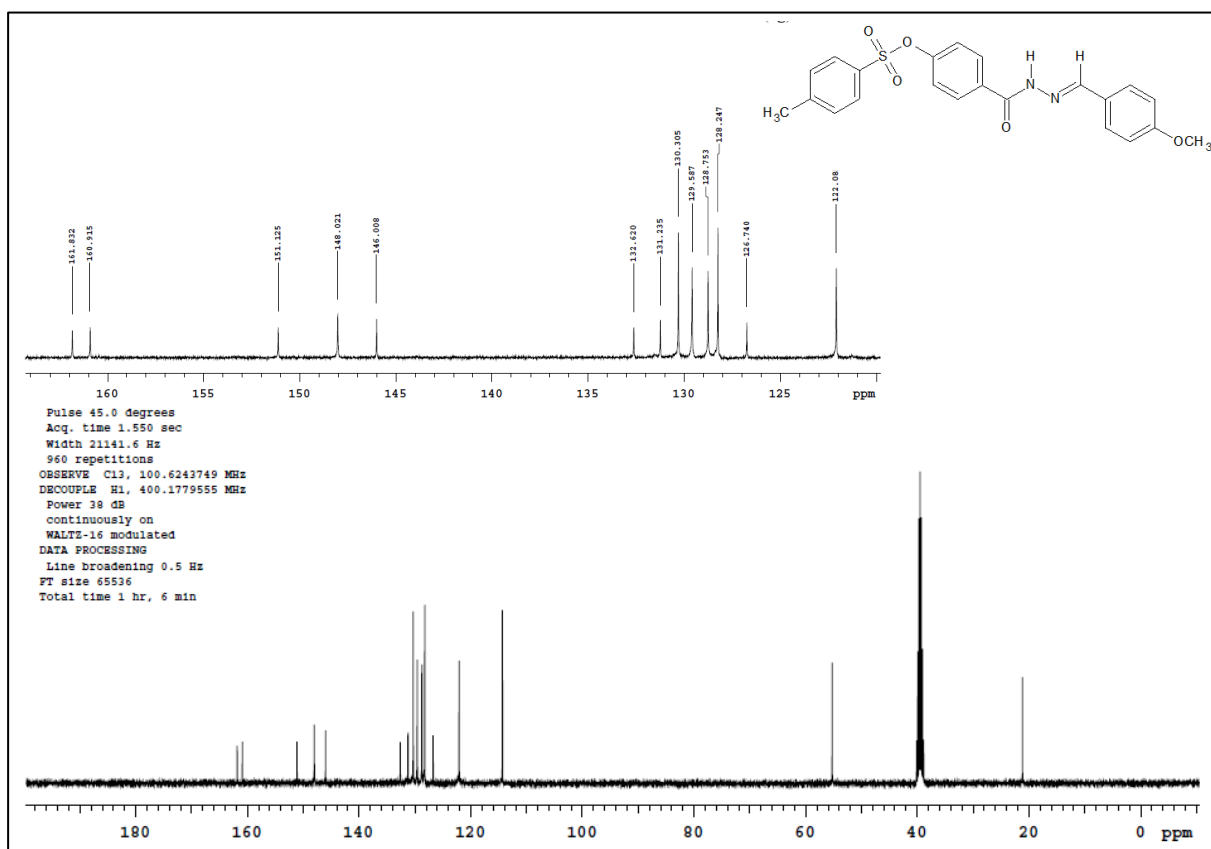

**Figure S26.** Compound **3g** <sup>13</sup>C-NMR spectrum (DMSO-d<sub>6</sub>, 100 MHz).

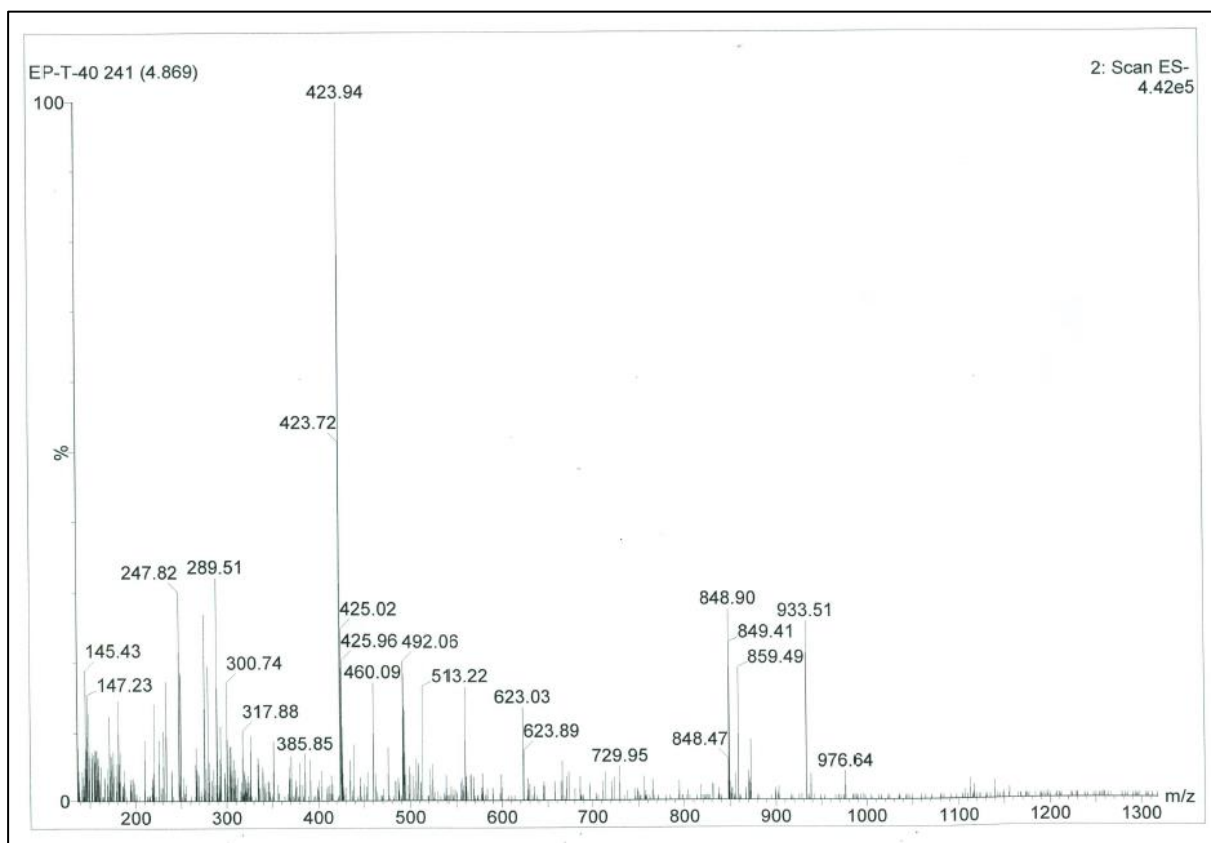

**Figure S27.** Compound **3g** ESI MS spectrum.

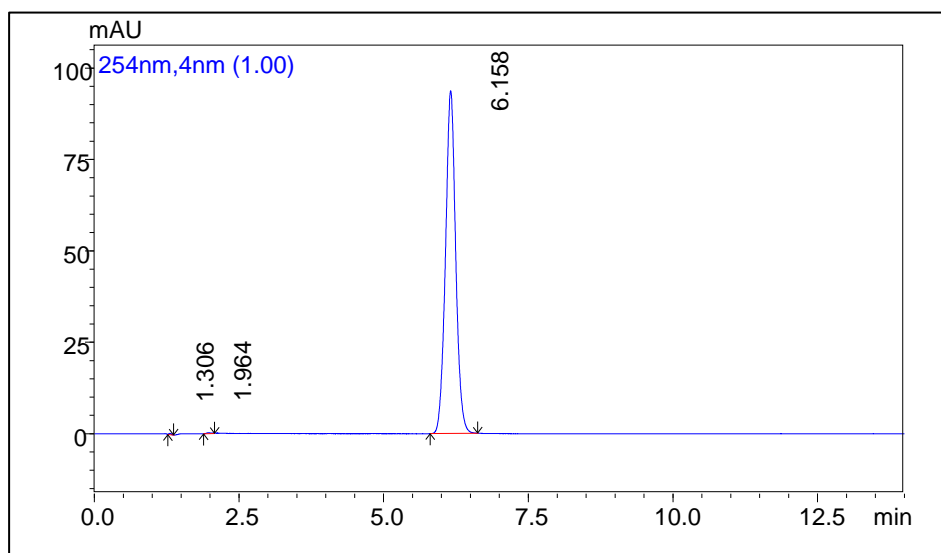

**Figure S28.** Chromatogram of compound **3g** (40  $\mu\text{g/mL}$ ) recorded under optimized conditions.

(*E*)-*N'*-[(2-Bromophenyl)methylidene]-4-[(4-methylphenyl)sulfonyloxy]benzohydrazide (**3h**)

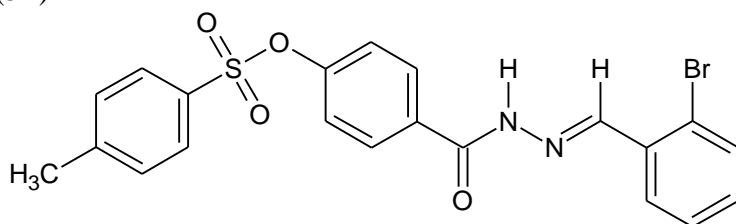

Lab Code: EP-T-2B

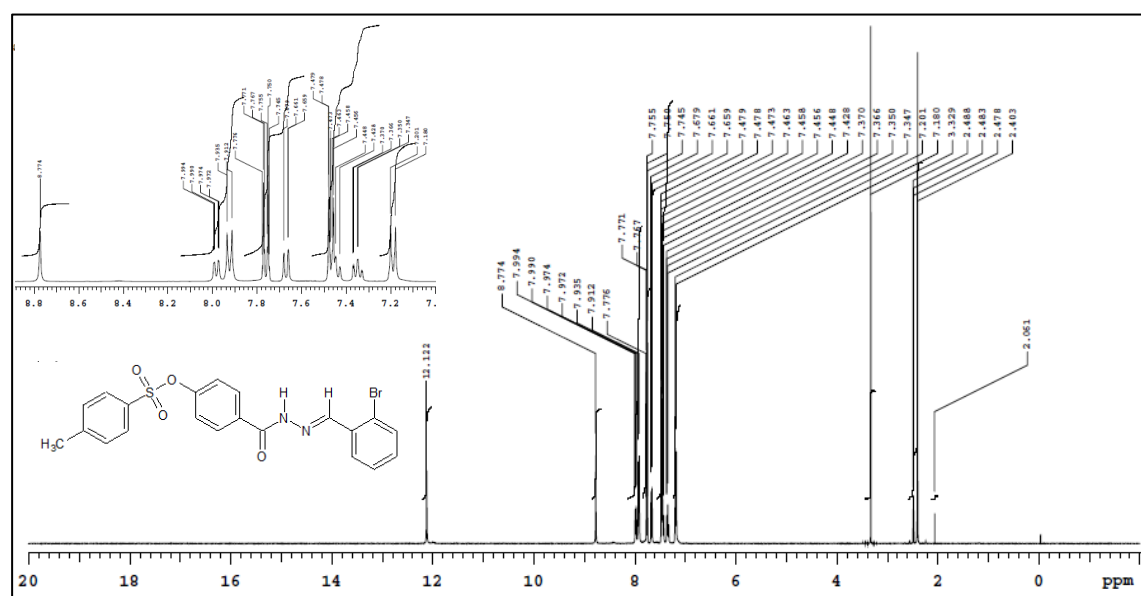

**Figure S29.** Compound **3h**  $^1\text{H}$ -NMR spectrum (DMSO- $\text{d}_6$ , 400 MHz).

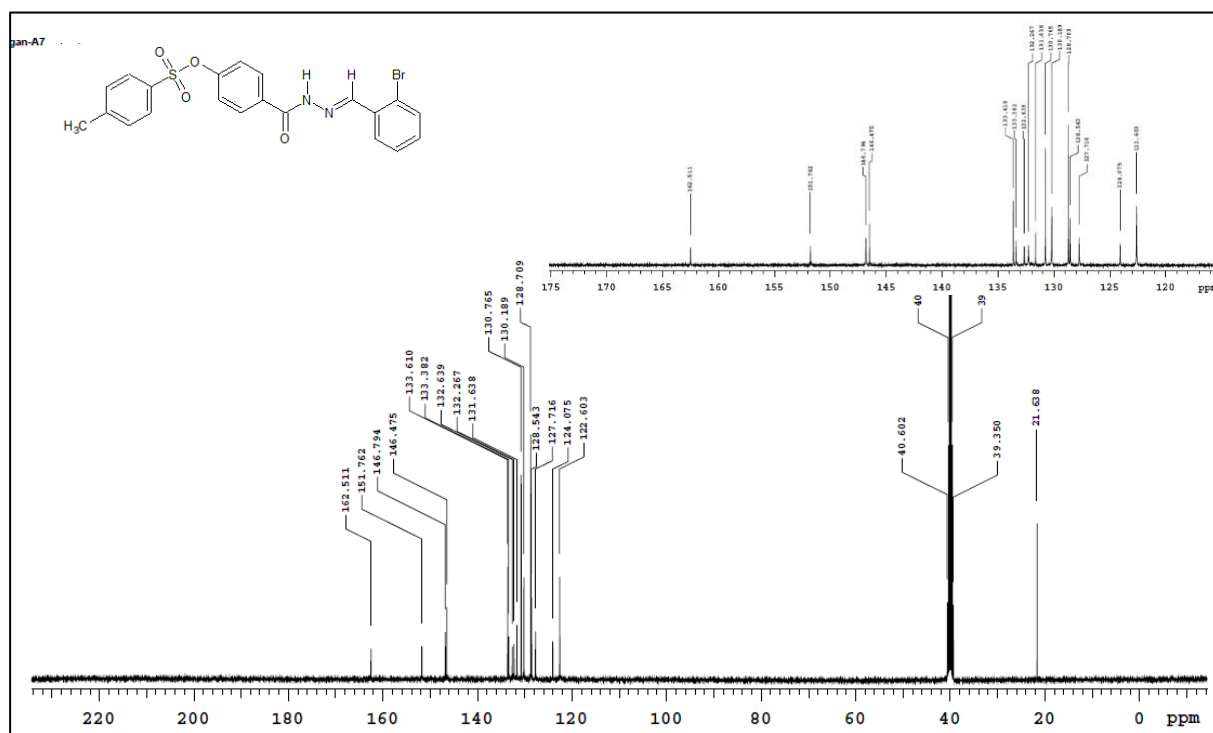

**Figure S30.** Compound **3h** <sup>13</sup>C-NMR spectrum (DMSO-d<sub>6</sub>, 100 MHz).

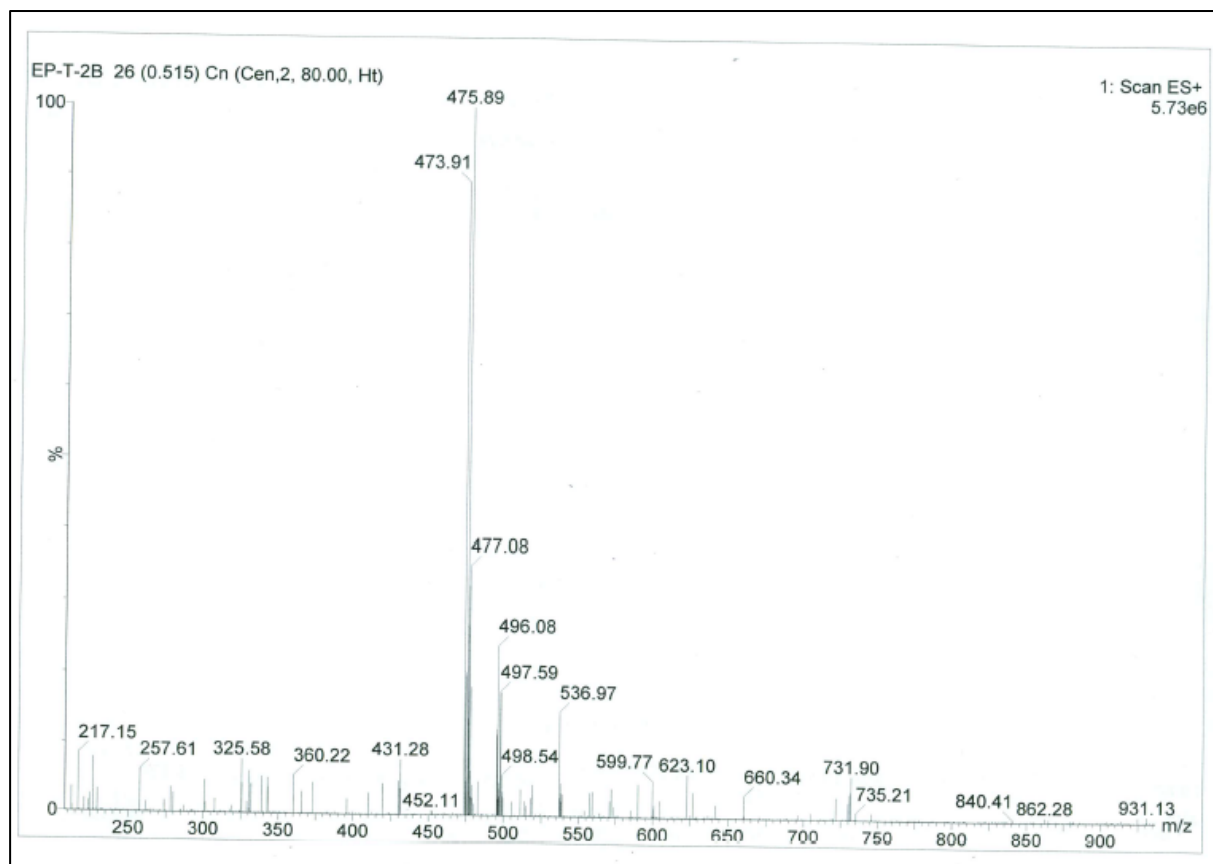

**Figure S31.** Compound **3h** ESI MS spectrum.

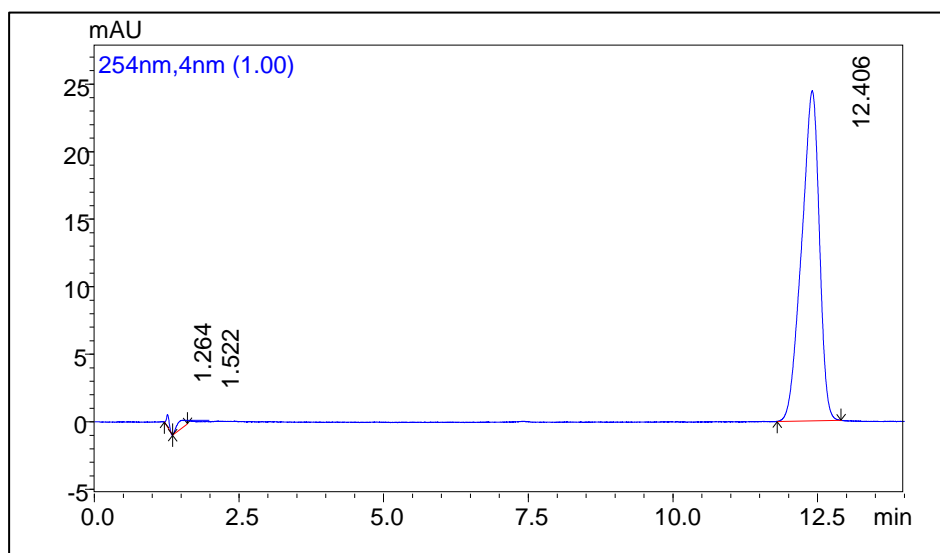

**Figure S32.** Chromatogram of compound **3h** (28 µg/mL) recorded under optimized conditions.

(*E*)-*N'*-[(3-Bromophenyl)methylidene]-4-[(4-methylphenyl)sulfonyloxy]benzohydrazide (**3i**)

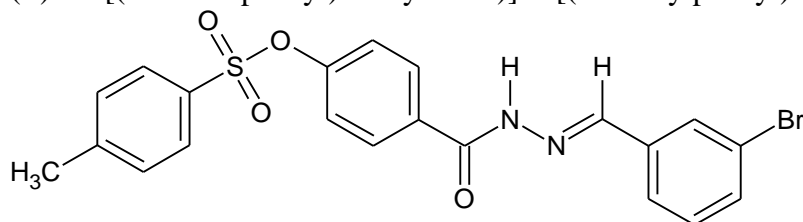

Lab Code: EP-T-3B

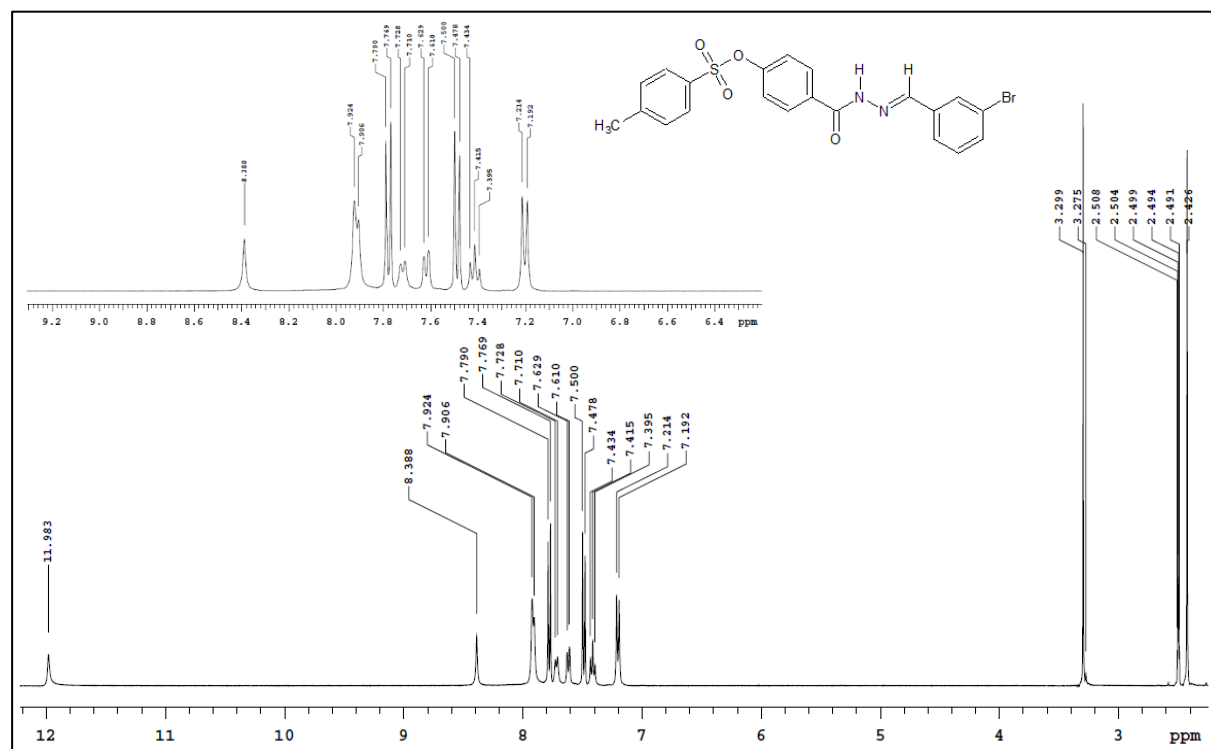

**Figure S33.** Compound **3i** <sup>1</sup>H-NMR spectrum (DMSO-d<sub>6</sub>, 400 MHz).

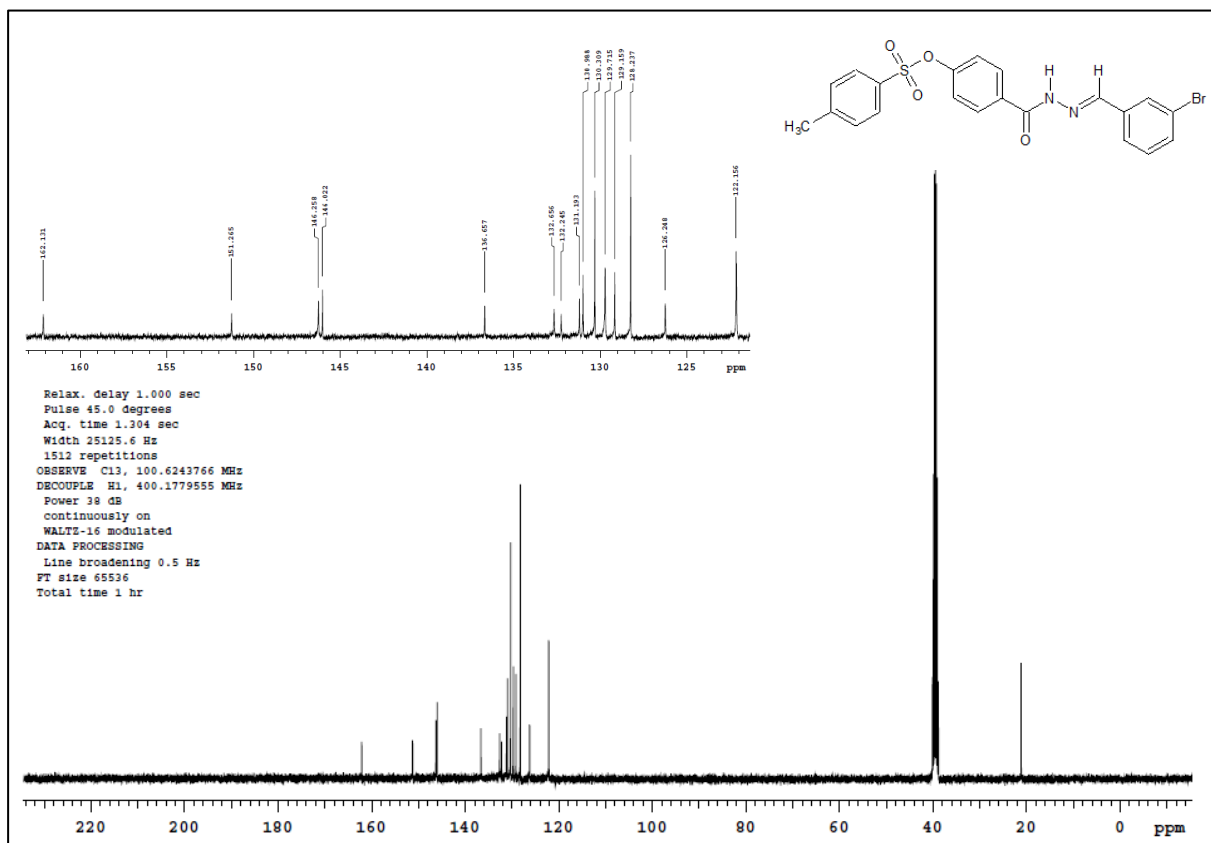

**Figure S34.** Compound **3i** <sup>13</sup>C-NMR spectrum (DMSO-d<sub>6</sub>, 100 MHz).

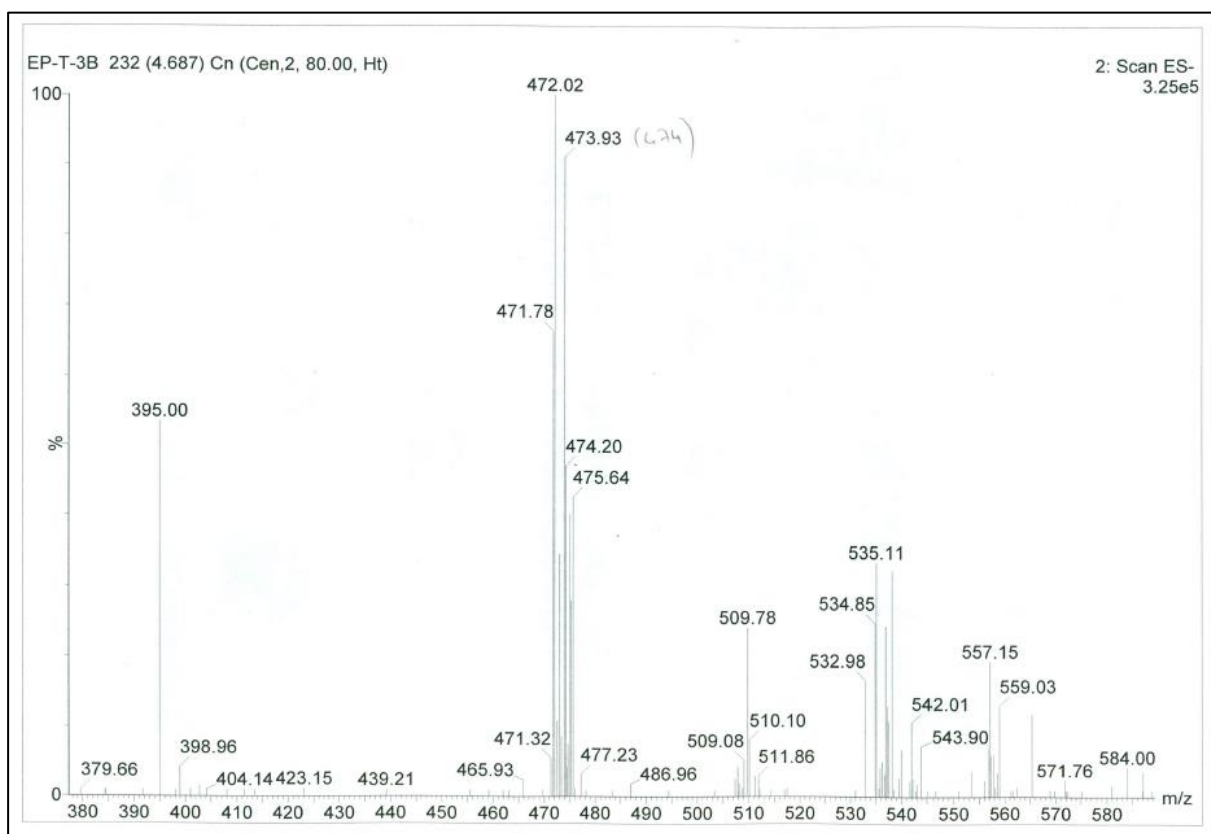

**Figure S35.** Compound **3i** ESI MS spectrum.

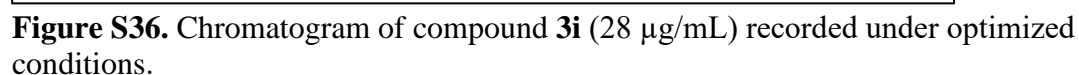

**Chemical Structure:**

**Lab Code:** EP-T-4B

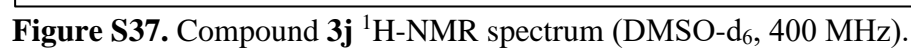

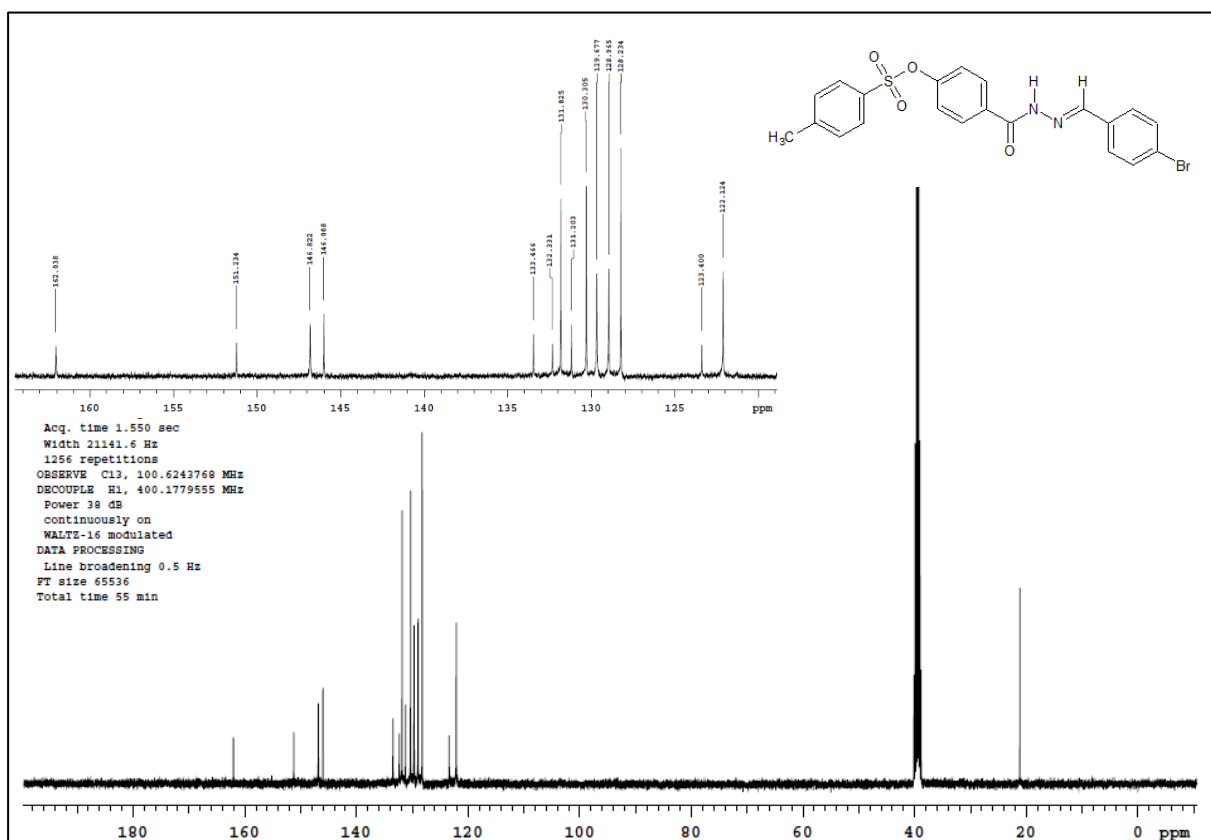

**Figure S38.** Compound **3j** <sup>13</sup>C-NMR spectrum (DMSO-d<sub>6</sub>, 100 MHz).

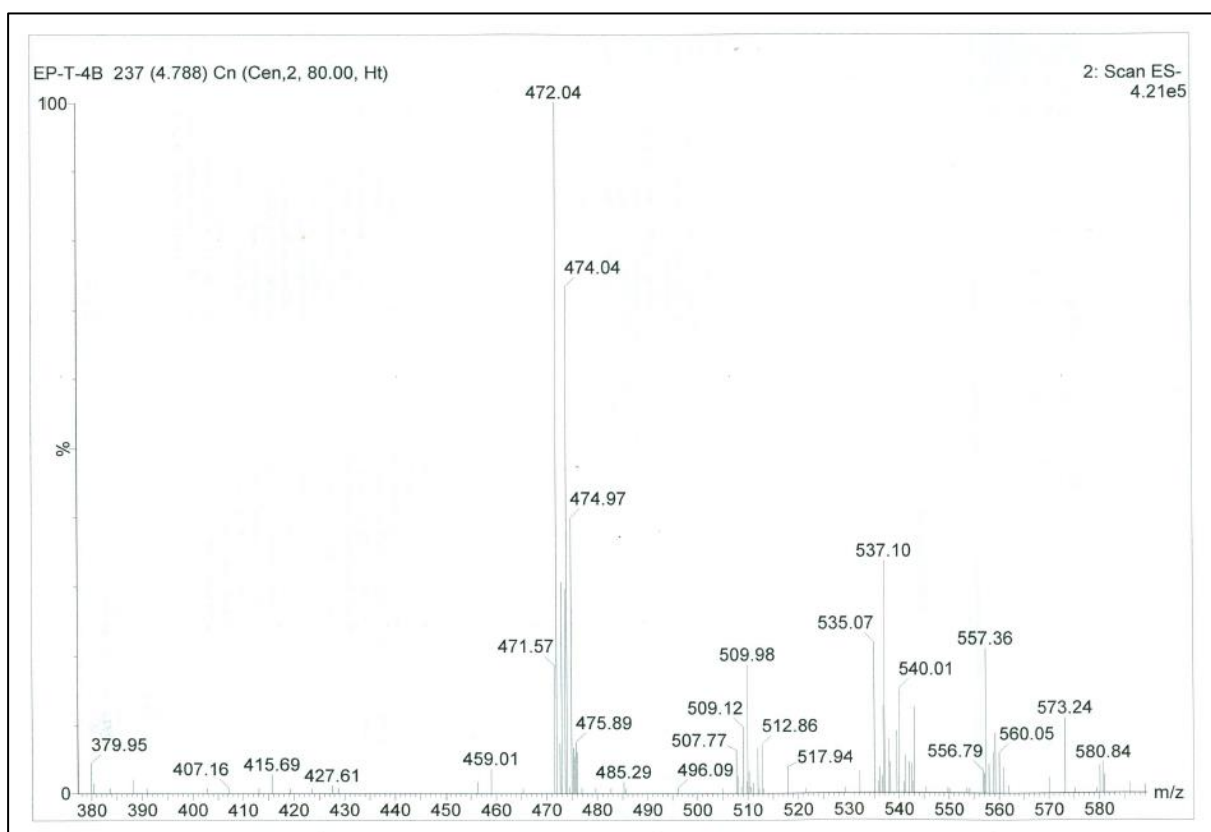

**Figure S39.** Compound **3j** ESI MS spectrum.

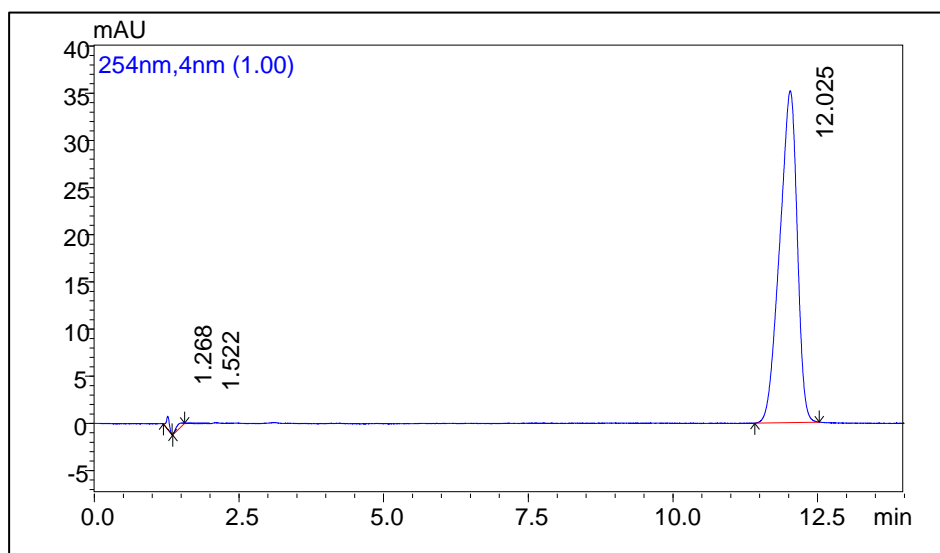

**Figure S40.** Chromatogram of compound **3j** (44  $\mu\text{g/mL}$ ) recorded under optimized conditions.

(*E*)-*N'*-(2-Chlorophenyl)methylidene]-4-[(4-methylphenyl)sulfonyloxy]benzohydrazide (**3k**)

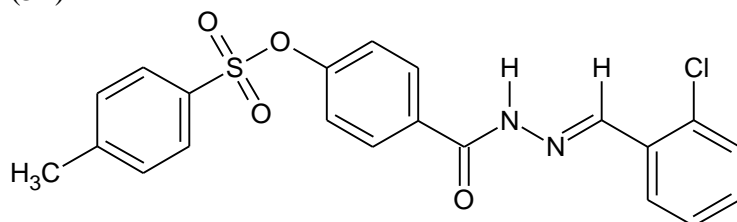

Lab Code: EP-T-2K

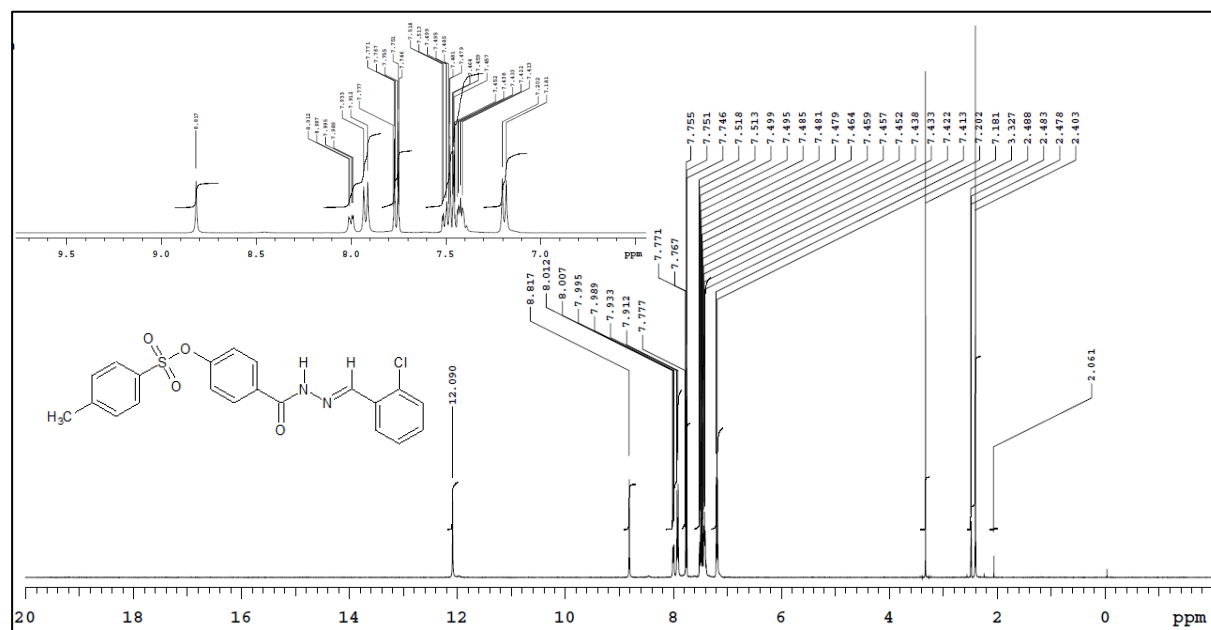

**Figure S41.** Compound **3k**  $^1\text{H}$ -NMR spectrum ( $\text{DMSO-d}_6$ , 400 MHz).



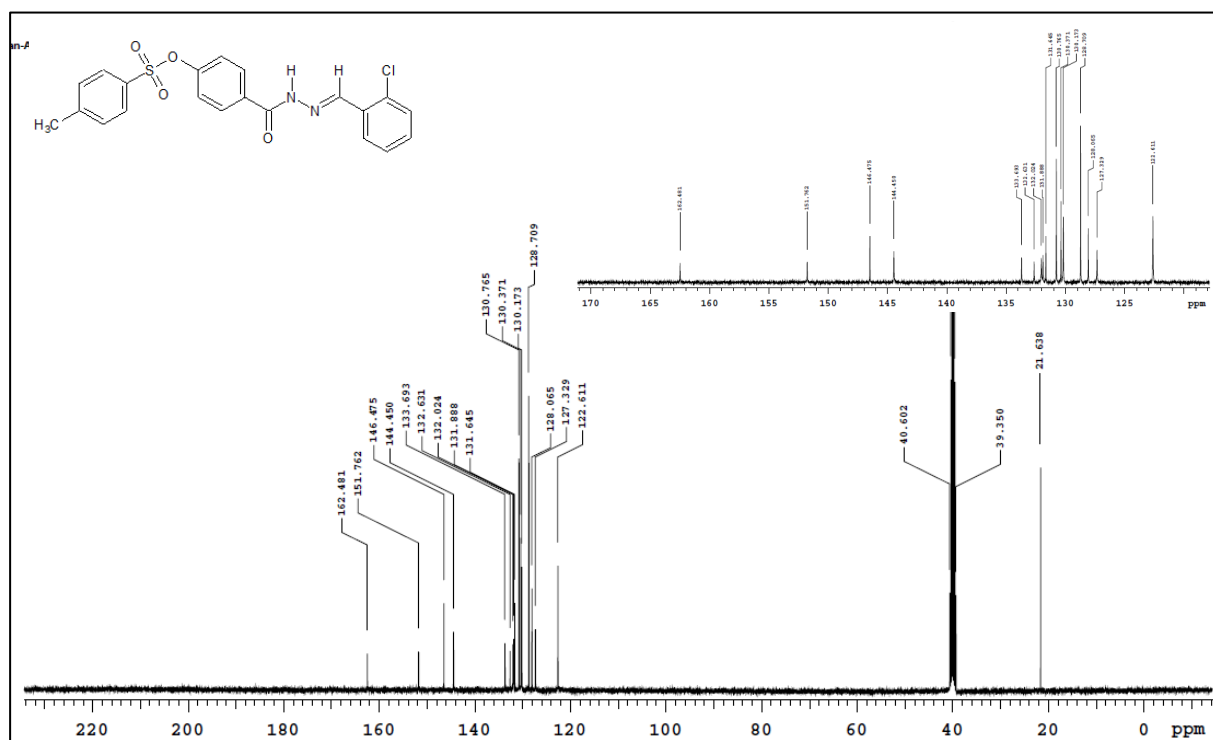

**Figure S42.** Compound **3k** <sup>13</sup>C-NMR spectrum (DMSO-d<sub>6</sub>, 100 MHz).

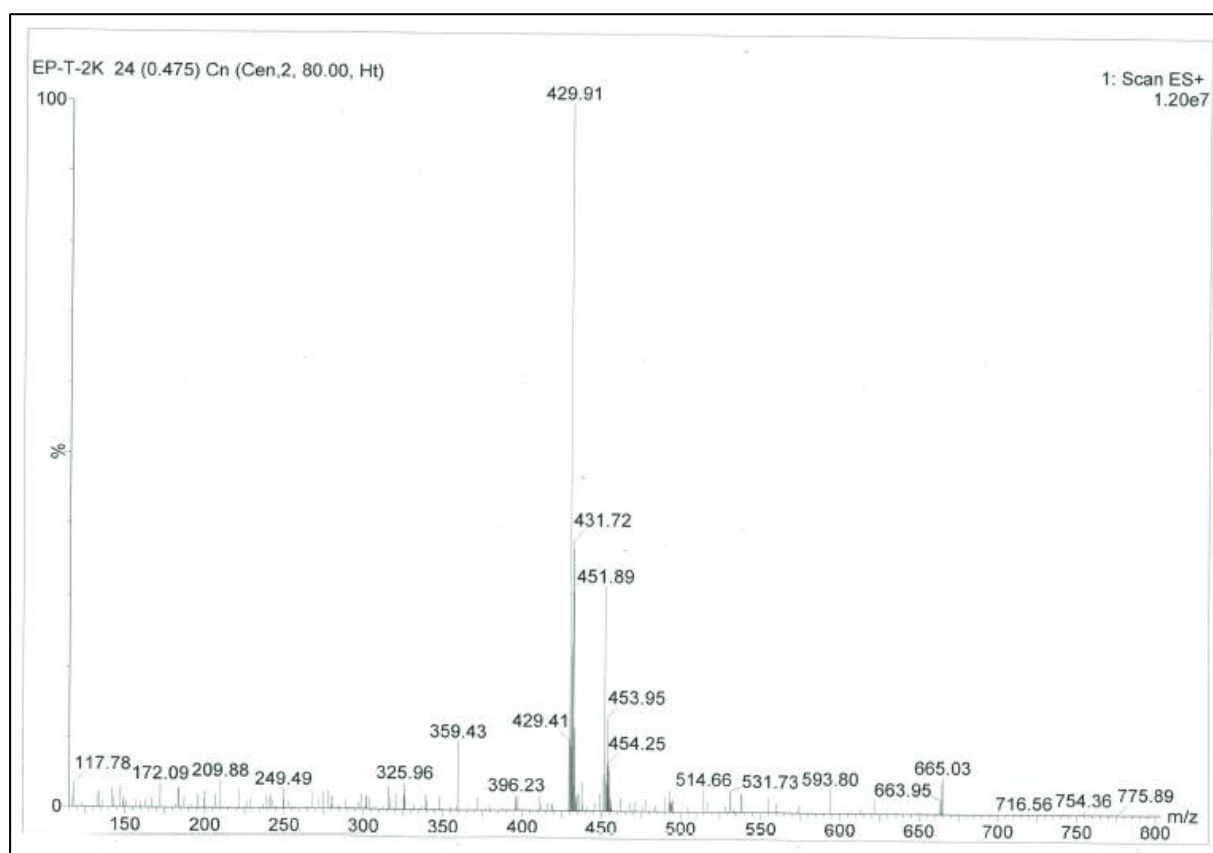

**Figure S43.** Compound **3k** ESI MS spectrum.

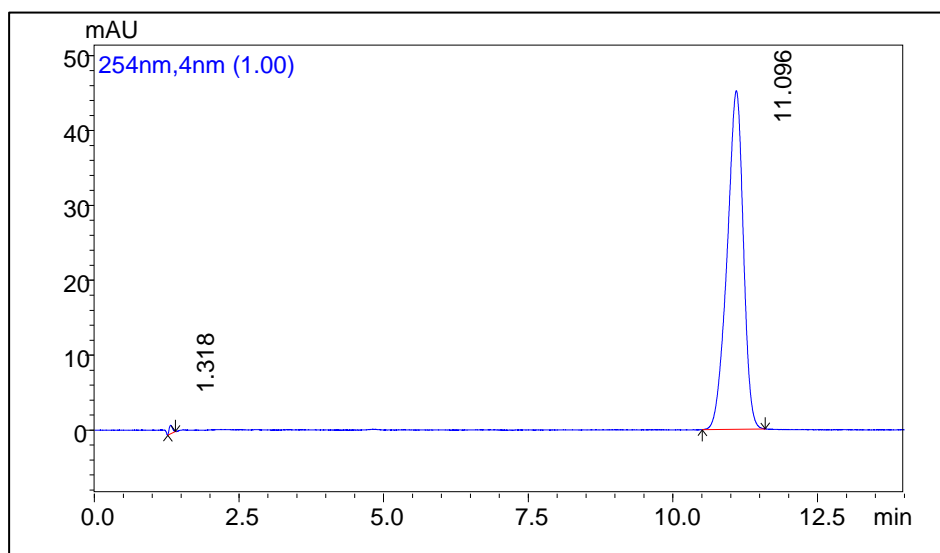

**Figure S44.** Chromatogram of compound **3k** (56 µg/mL) recorded under optimized conditions.

(*E*)-*N'*-[(3-Chlorophenyl)methylidene]-4-[(4-methylphenyl)sulfonyloxy]benzohydrazide (**3l**)

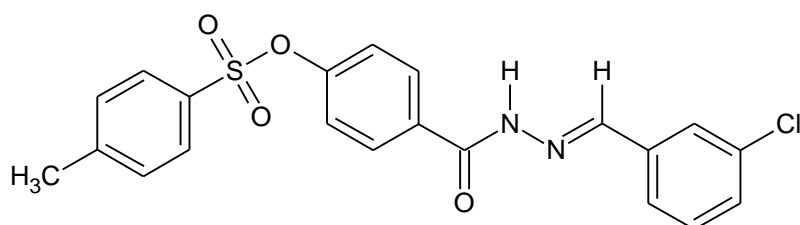

**Lab Code:** EP-T-3K

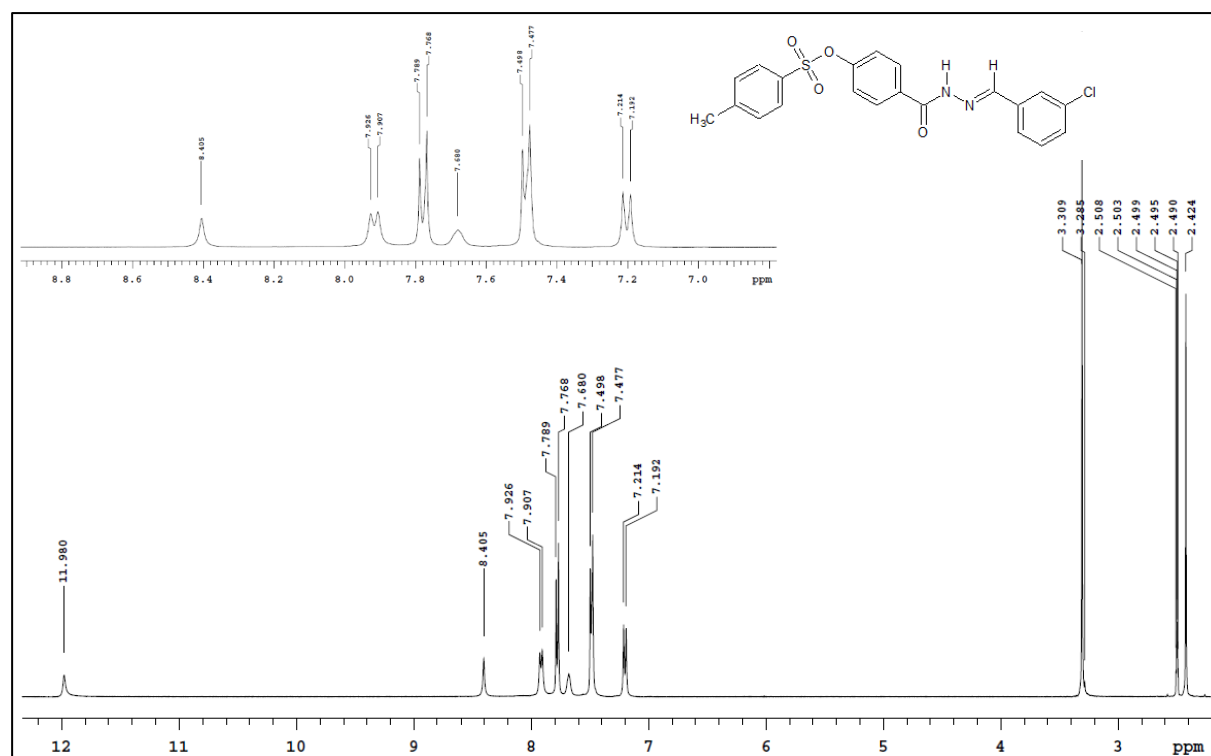

**Figure S45.** Compound **3l**  $^1\text{H}$ -NMR spectrum (DMSO- $\text{d}_6$ , 400 MHz).

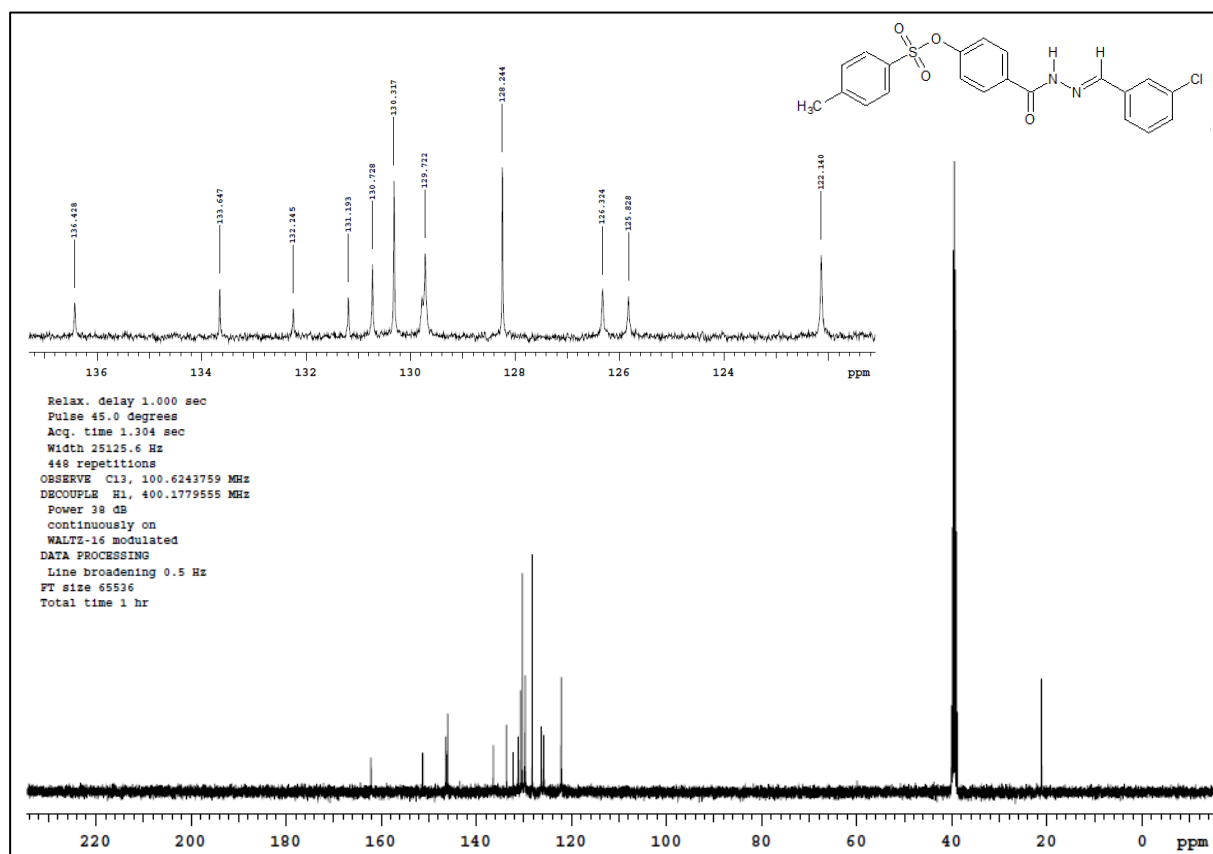

**Figure S46.** Compound **3l** <sup>13</sup>C-NMR spectrum (DMSO-d<sub>6</sub>, 100 MHz).

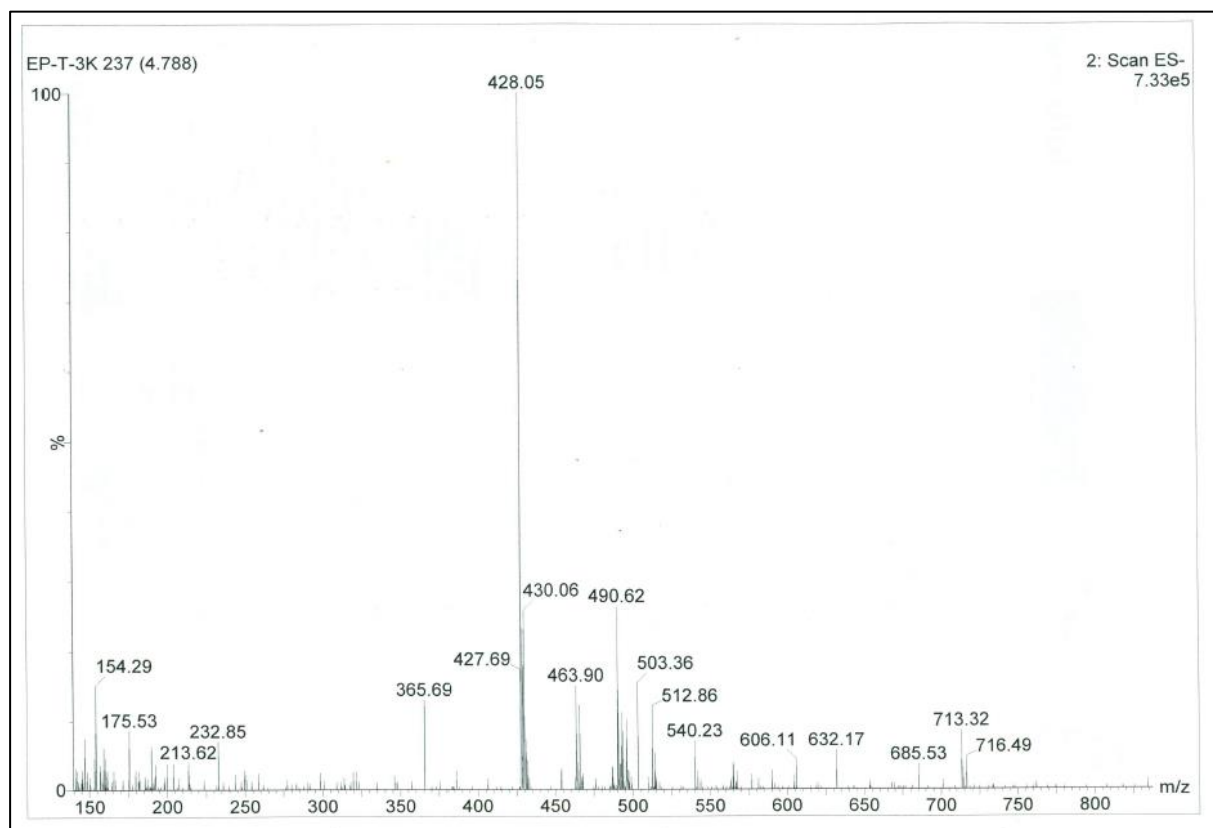

**Figure S47.** Compound **3l** ESI MS spectrum.

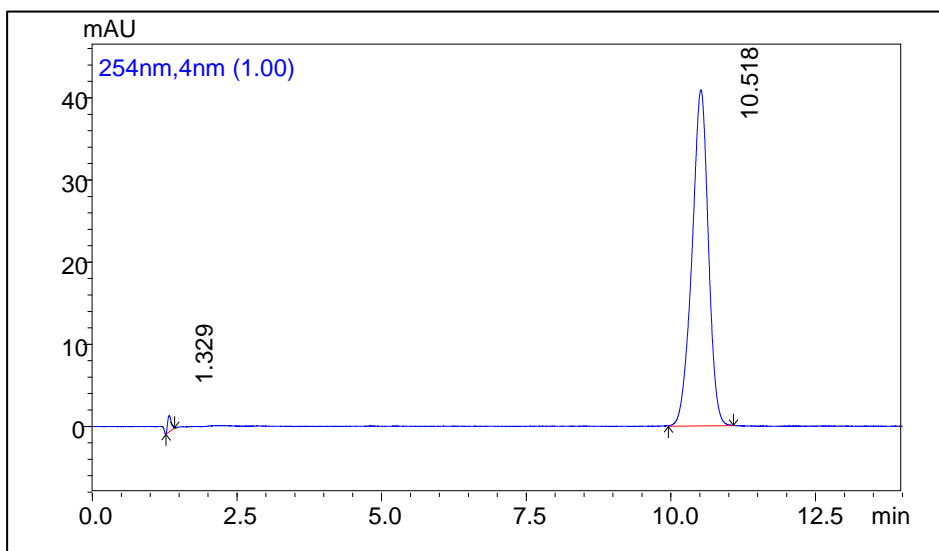

**Figure S48.** Chromatogram of compound **3l** (64  $\mu\text{g/mL}$ ) recorded under optimized conditions.

(*E*)-*N'*-[(4-Chlorophenyl)methylidene]-4-[(4-methylphenyl)sulfonyloxy]benzohydrazide (**3m**)

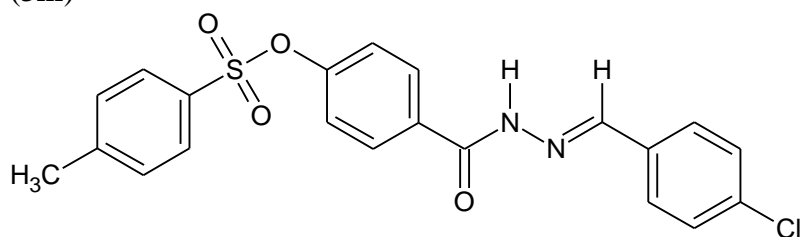

Lab Code: EP-T-4K

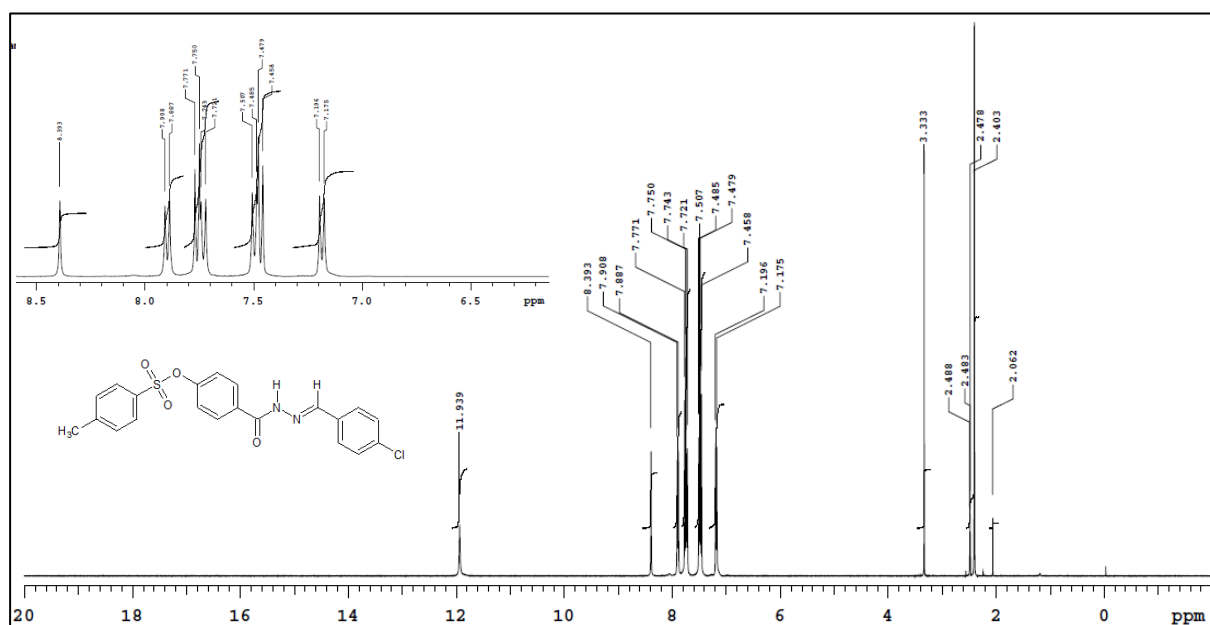

**Figure S49.** Compound **3m**  $^1\text{H}$ -NMR spectrum ( $\text{DMSO-d}_6$ , 400 MHz).

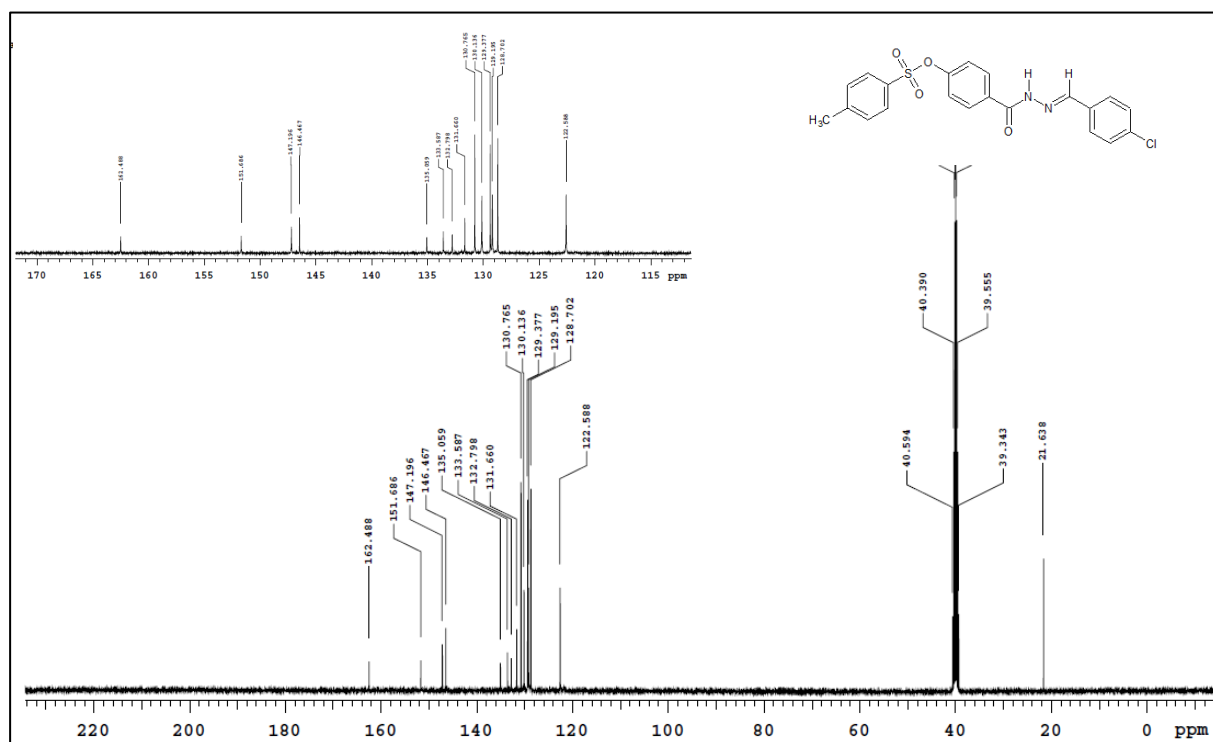

**Figure S50.** Compound **3m** <sup>13</sup>C-NMR spectrum (DMSO-d<sub>6</sub>, 100 MHz).

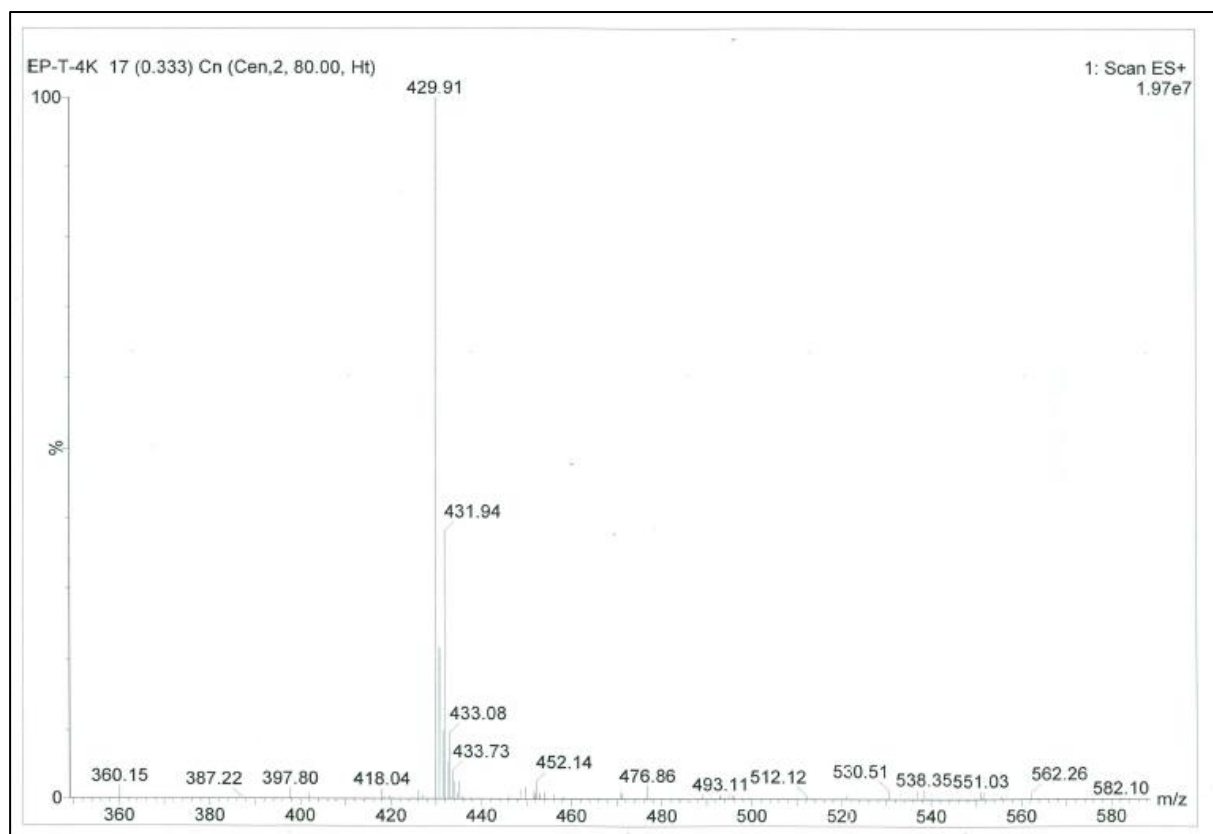

**Figure S51.** Compound **3m** ESI MS spectrum.

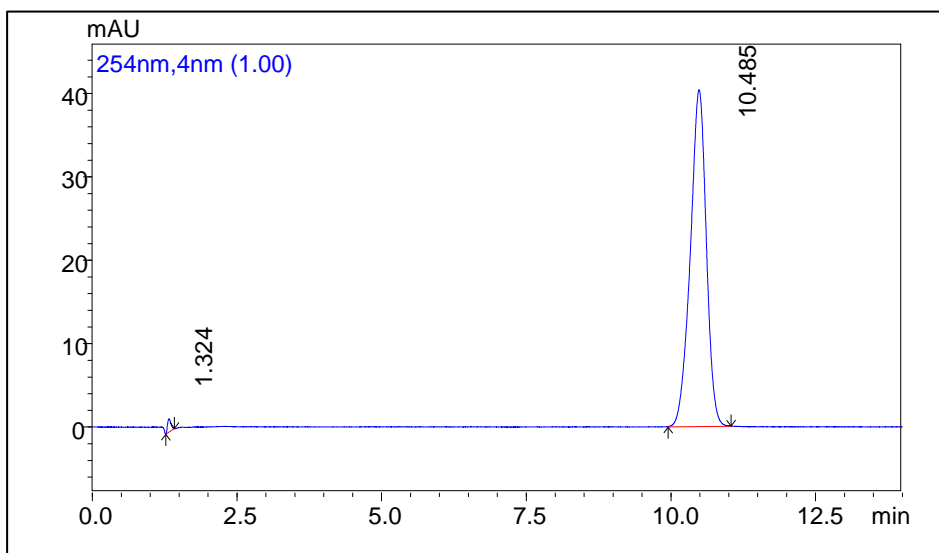

**Figure S52.** Chromatogram of compound **3m** (40  $\mu\text{g/mL}$ ) recorded under optimized conditions.

(*E*)-*N'* -[(2-Fluorophenyl)methylidene]-4-[(4-methylphenyl)sulfonyloxy]benzohydrazide (**3n**)

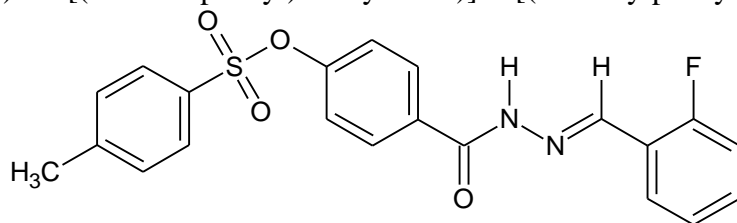

**Lab Code:** EP-T-2F

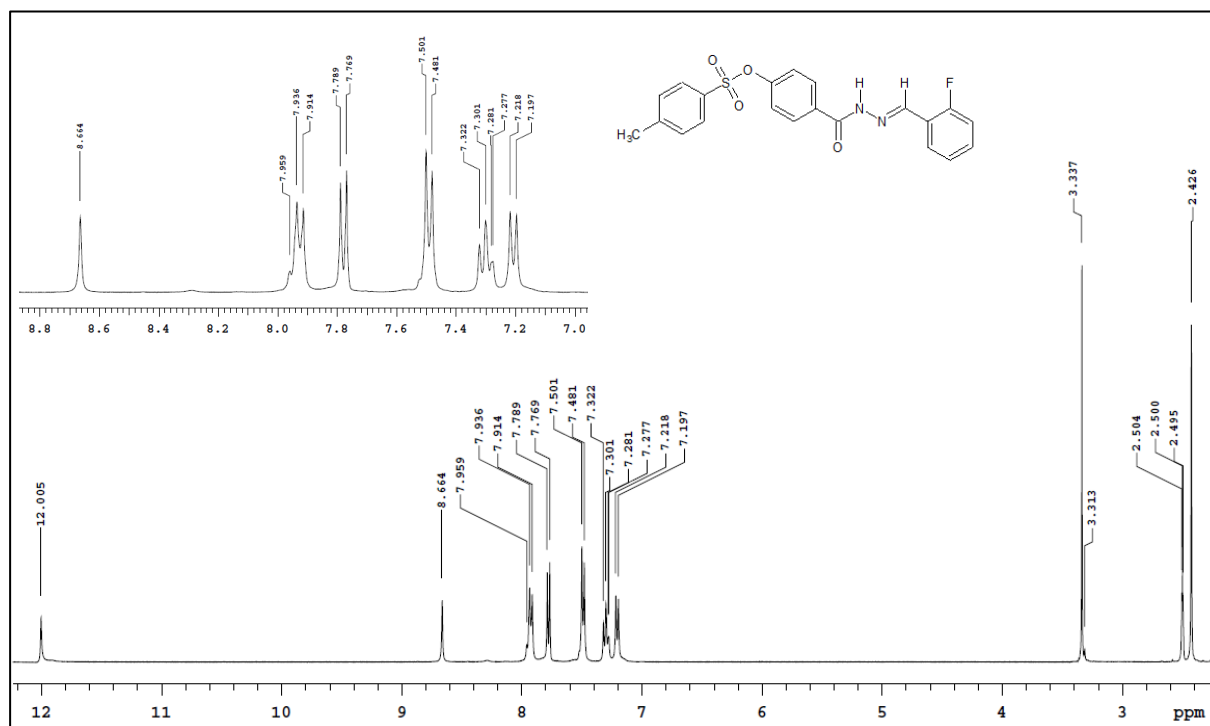

**Figure S53.** Compound **3n**  $^1\text{H}$ -NMR spectrum (DMSO- $d_6$ , 400 MHz).

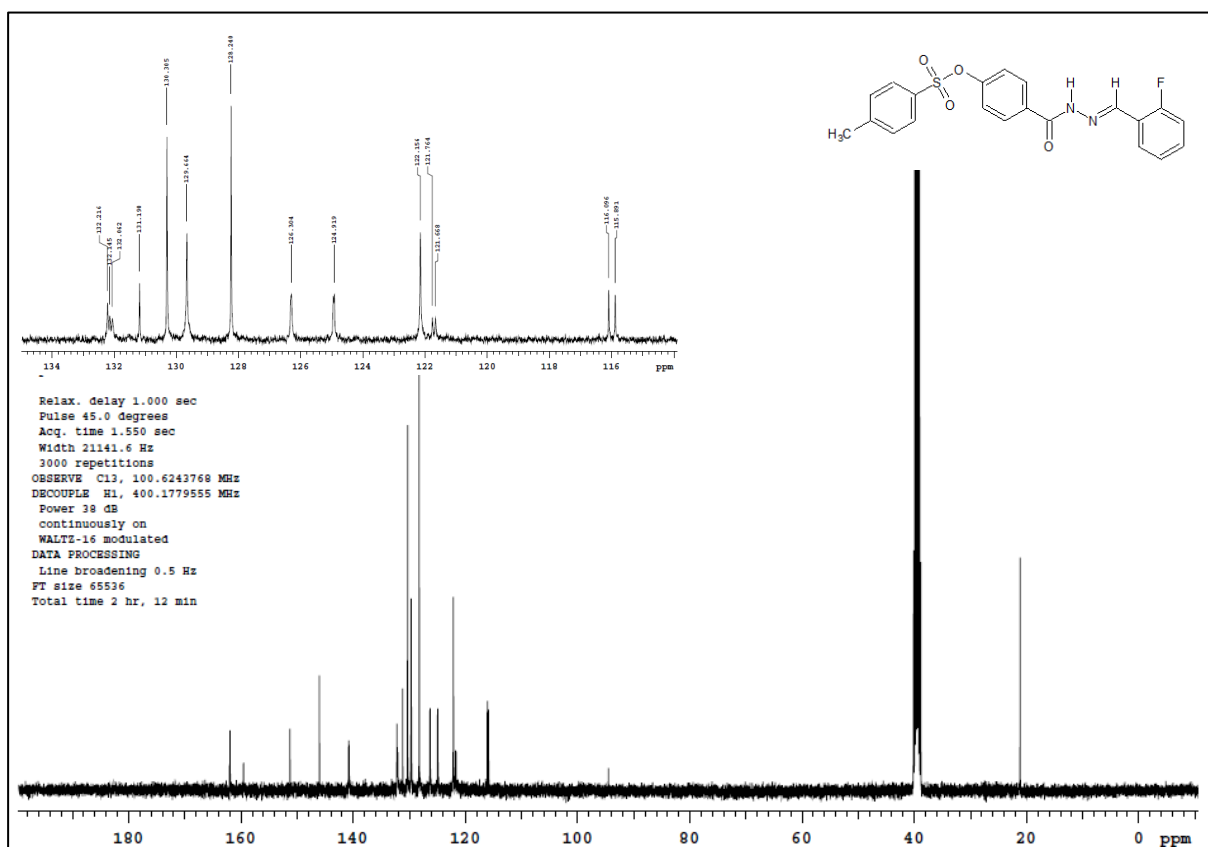

Figure S54. Compound **3n** <sup>13</sup>C-NMR spectrum (DMSO-d<sub>6</sub>, 100 MHz).

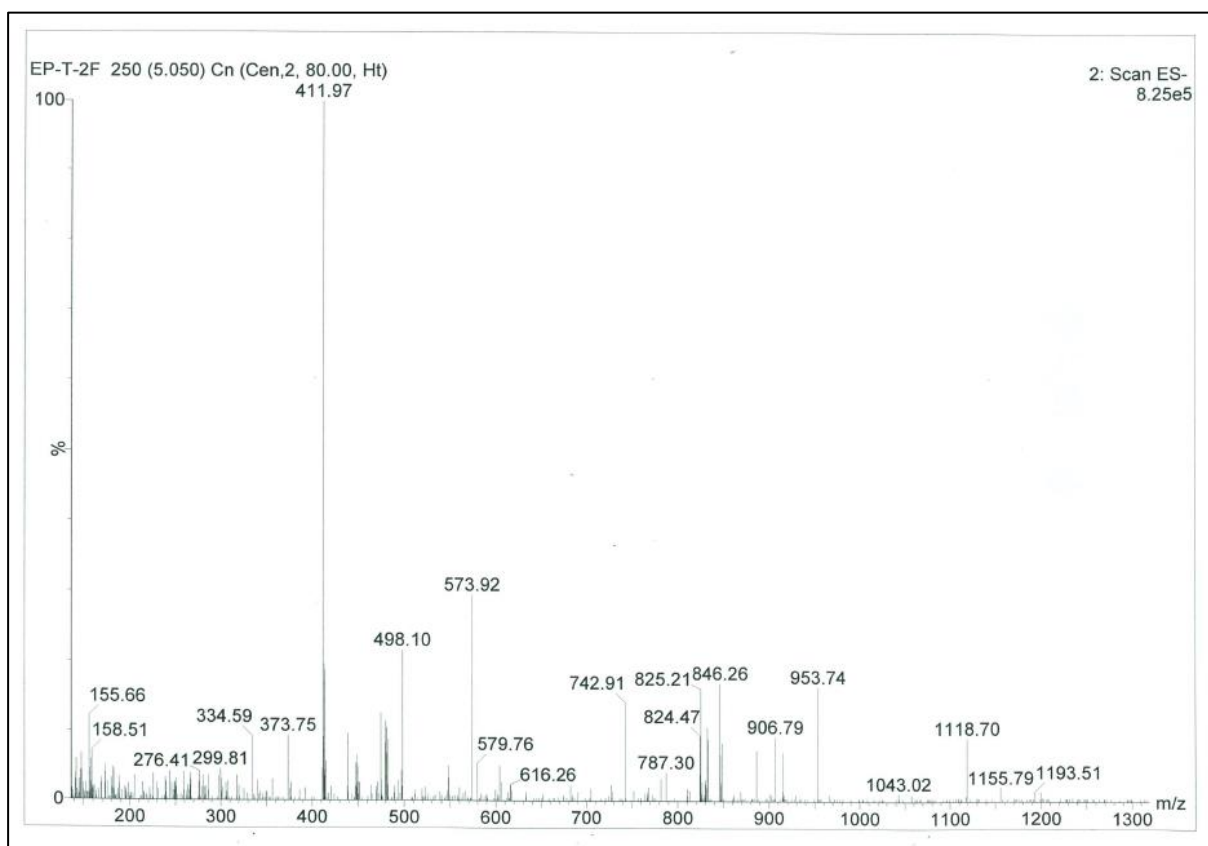

Figure S55. Compound **3n** ESI MS spectrum.

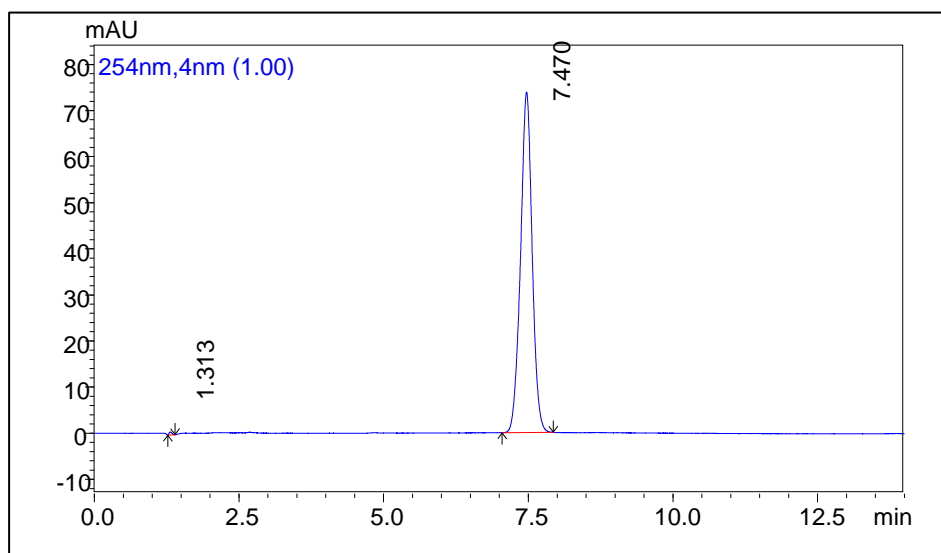

**Figure S56.** Chromatogram of compound **3n** (36 µg/mL) recorded under optimized conditions.

(*E*)-*N'*-[3-Fluorophenyl)methylidene]-4-[(4-methylphenyl)sulfonyloxy]benzohydrazide (**3o**)

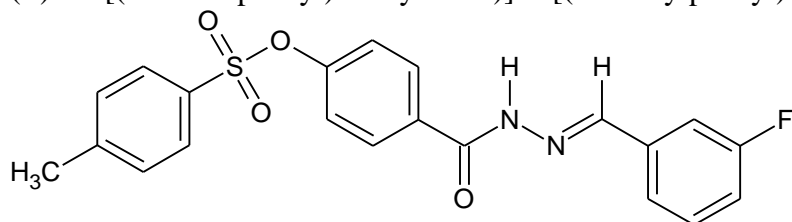

Lab Code: EP-T-3F

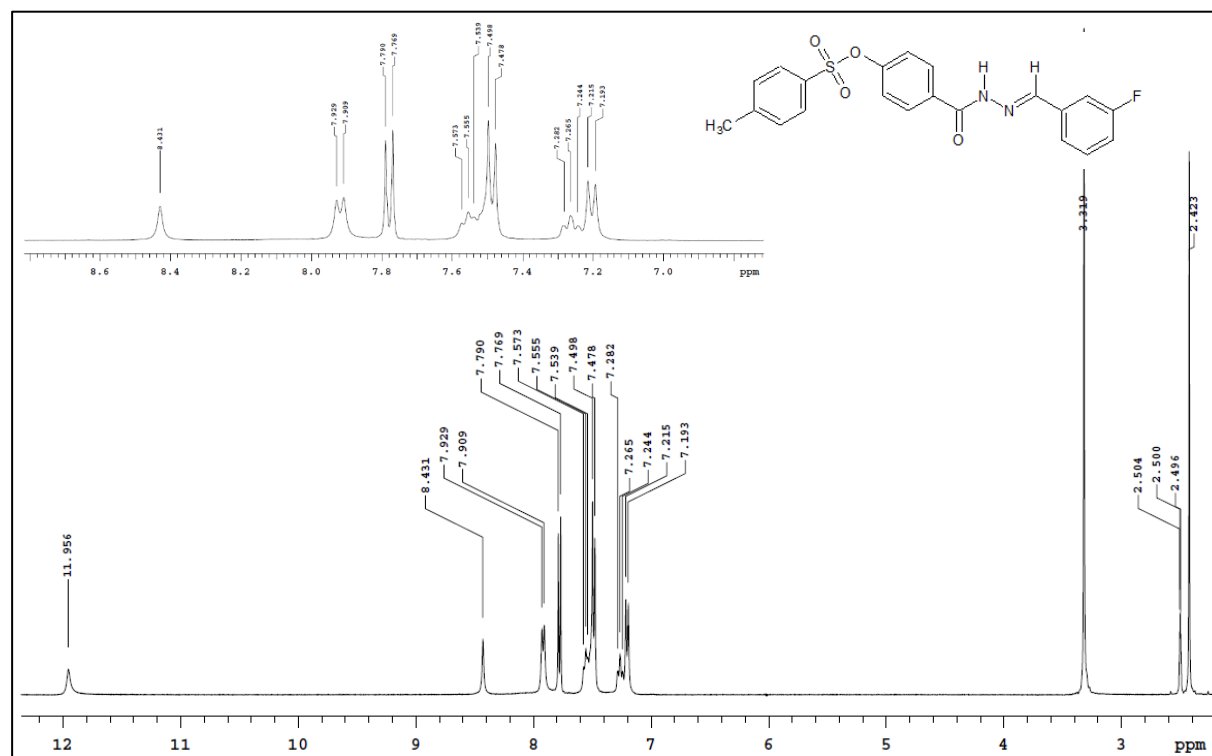

**Figure S57.** Compound **3o** <sup>1</sup>H-NMR spectrum (DMSO-d<sub>6</sub>, 400 MHz).



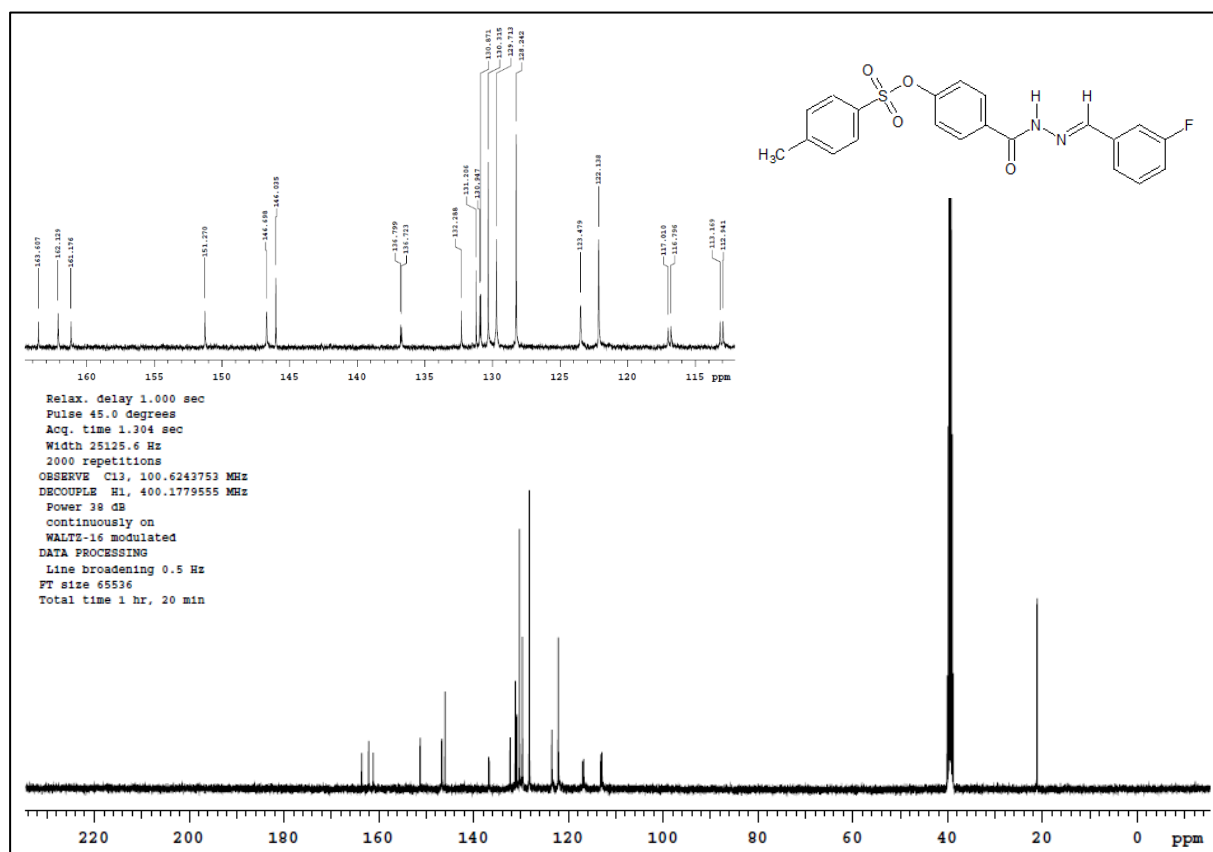

**Figure S58.** Compound **3o** <sup>13</sup>C-NMR spectrum (DMSO-d<sub>6</sub>, 100 MHz).

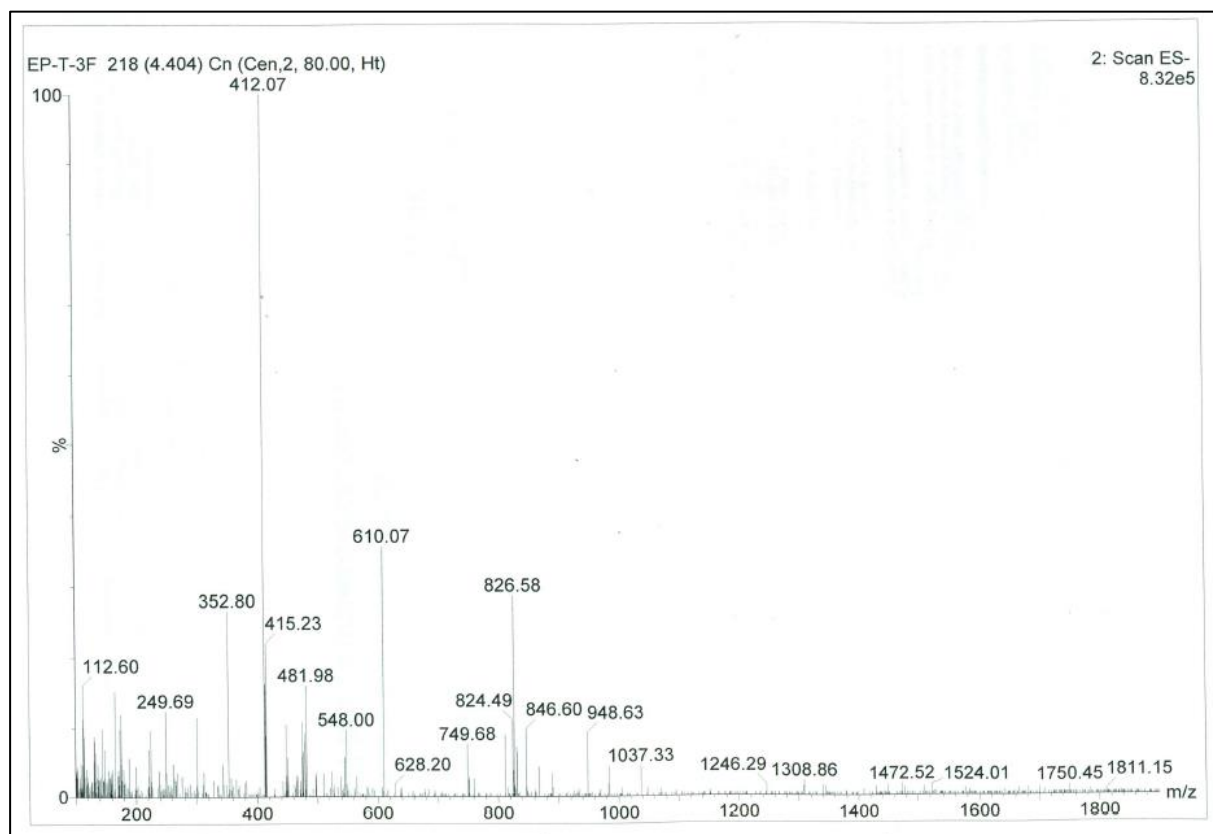

**Figure S59.** Compound **3o** ESI MS spectrum.

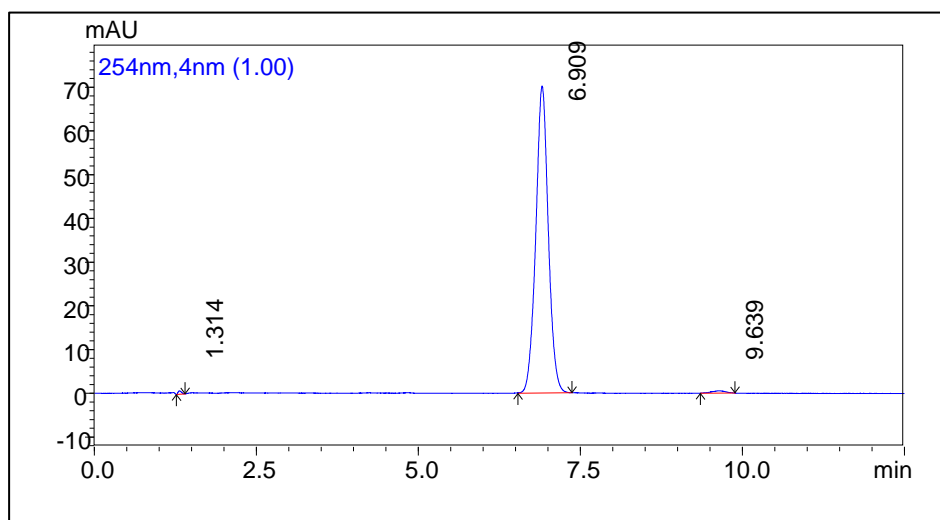

**Figure S60.** Chromatogram of compound **3o** (52 µg/mL) recorded under optimized conditions.

(*E*)-*N'*-[(4-Fluorophenyl)methylidene]-4-[(4-methylphenyl)sulfonyloxy]benzohydrazide (**3p**)

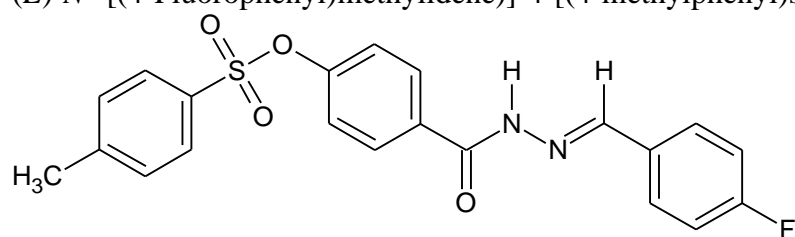

Lab Code: EP-T-4F

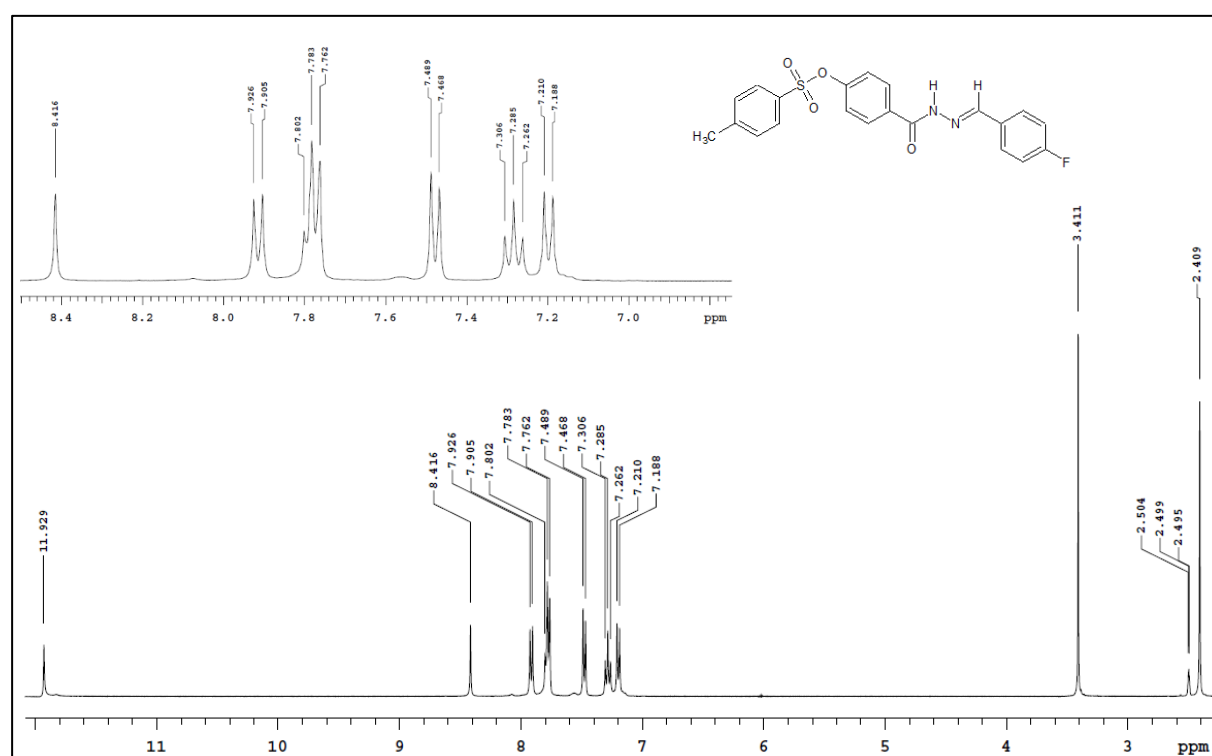

**Figure S61.** Compound **3p** <sup>1</sup>H-NMR spectrum (DMSO-d<sub>6</sub>, 400 MHz).

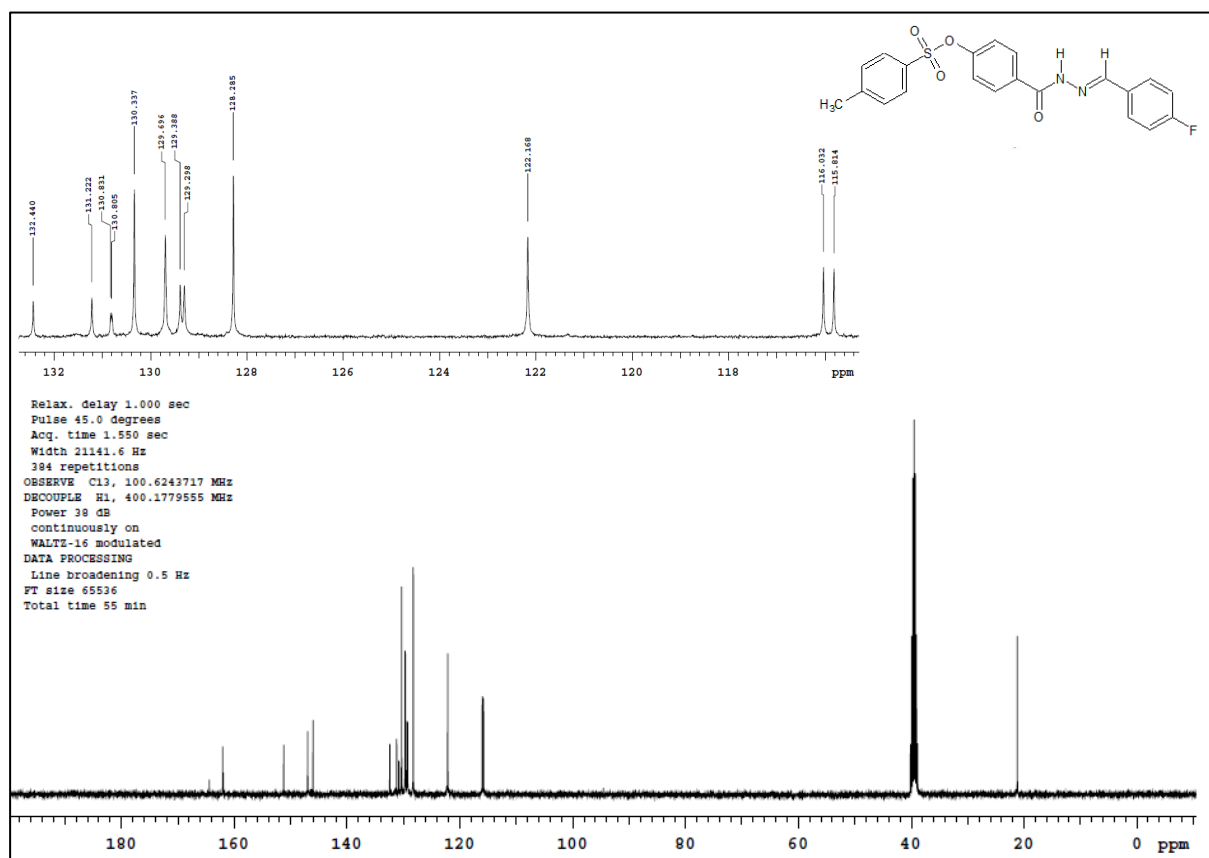

**Figure S62.** Compound **3p** <sup>13</sup>C-NMR spectrum (DMSO-d<sub>6</sub>, 100 MHz).

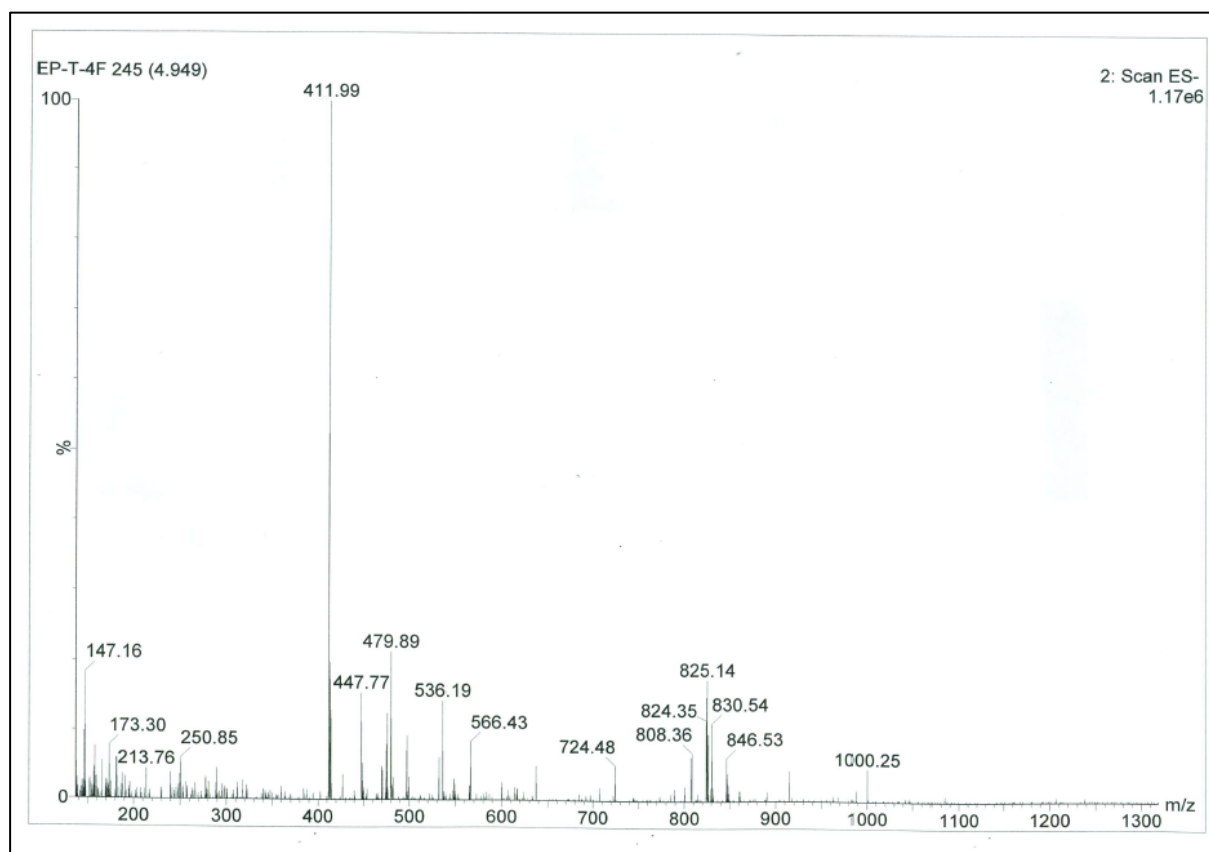

**Figure S63.** Compound **3p** ESI MS spectrum.

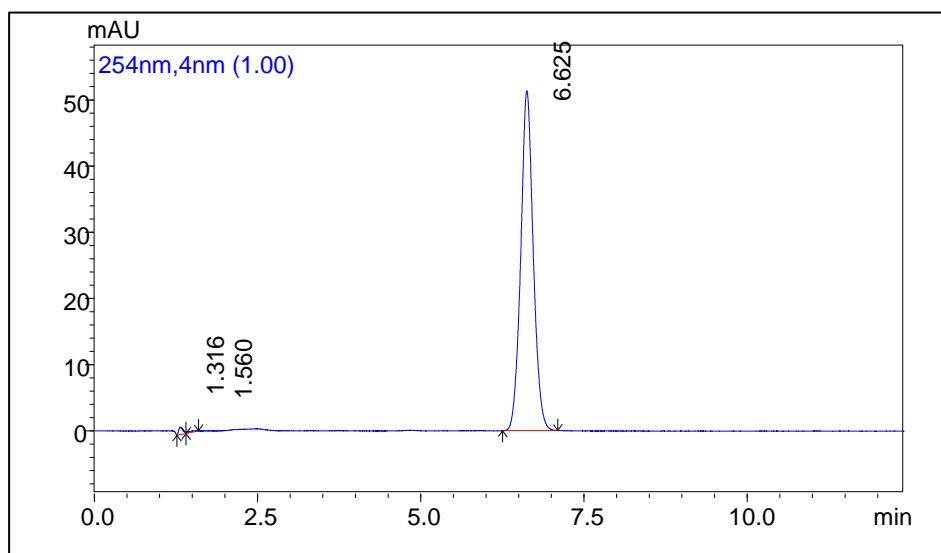

**Figure S64.** Chromatogram of compound **3p** (36 µg/mL) recorded under optimized conditions.

(*E*)-*N'*-[(2-Nitrophenyl)methylidene]-4-[(4-methylphenyl)sulfonyloxy]benzohydrazide (**3r**)

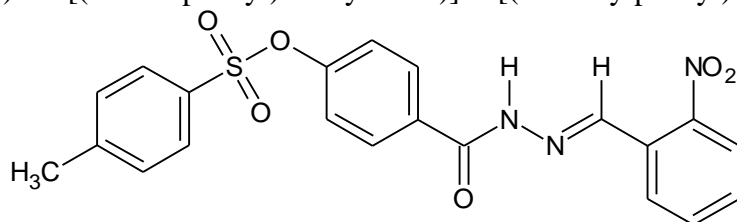

Lab Code: EP-T-2N

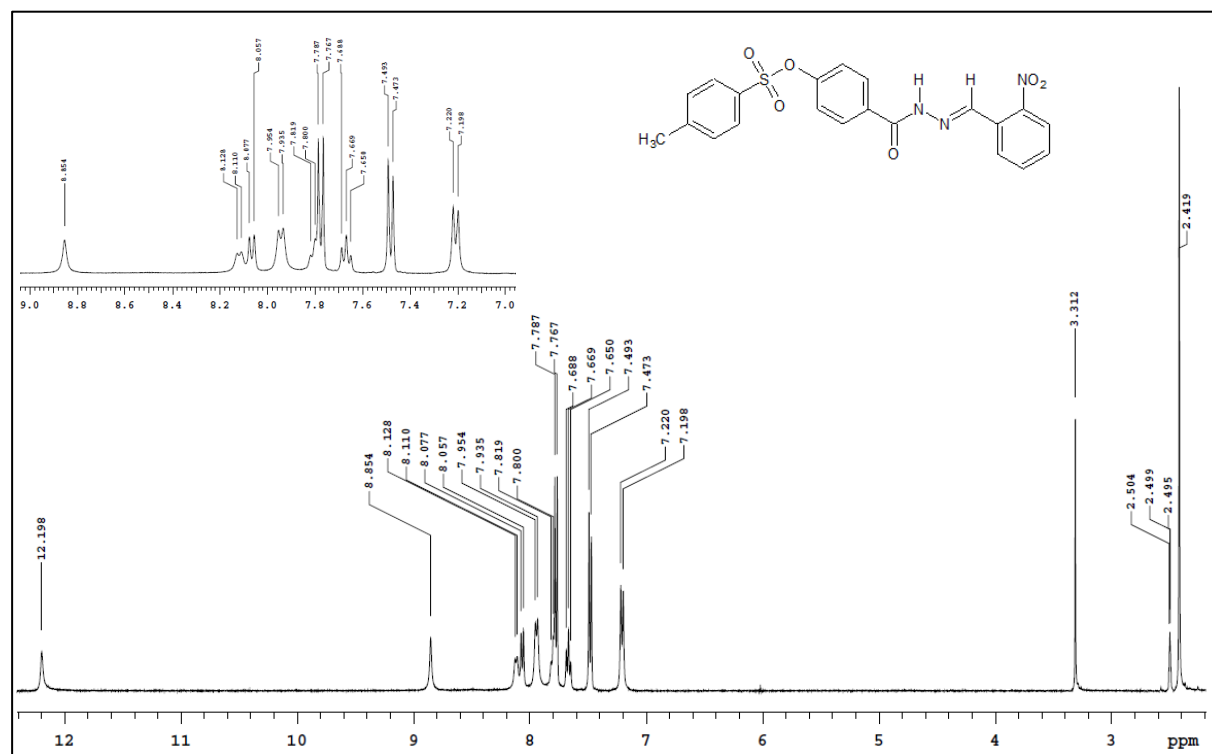

**Figure S65.** Compound **3r** <sup>1</sup>H-NMR spectrum (DMSO-*d*<sub>6</sub>, 400 MHz).

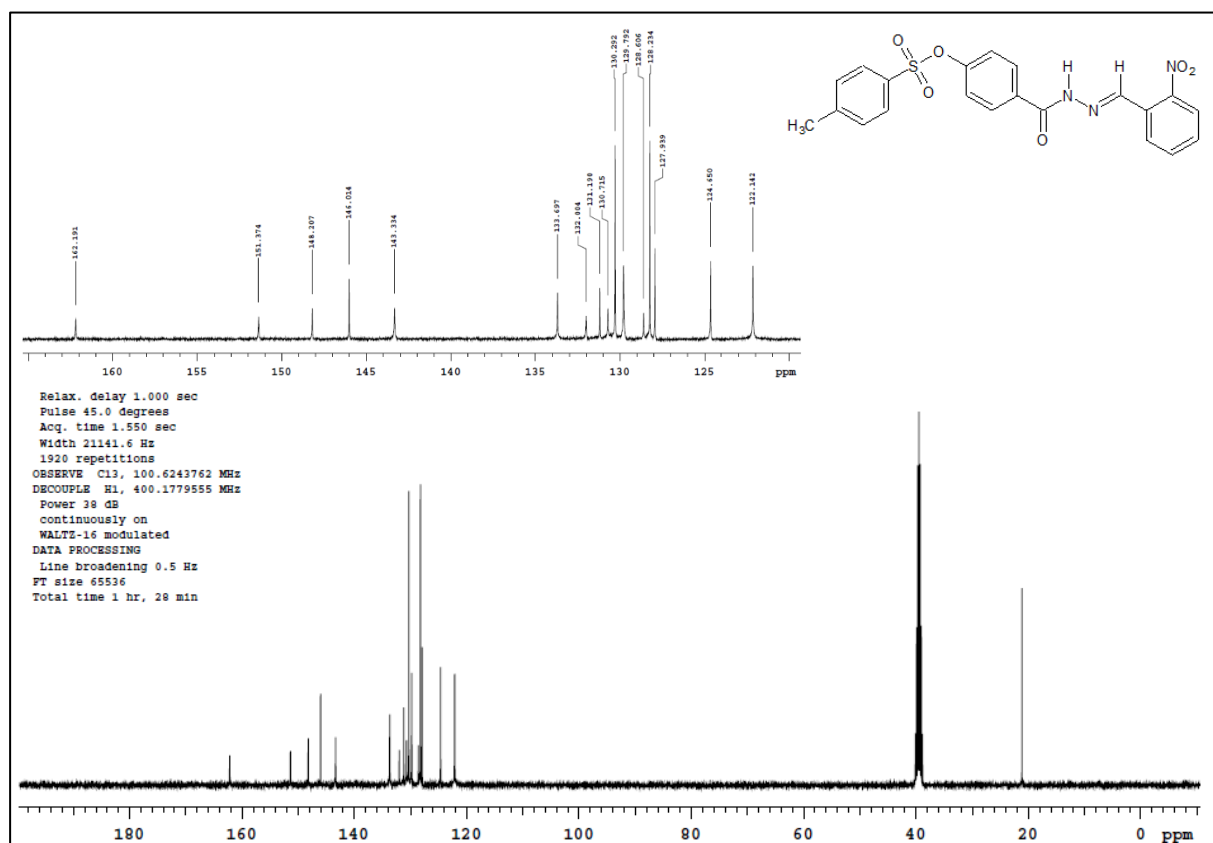

**Figure S66.** Compound **3r** <sup>13</sup>C-NMR spectrum (DMSO-d<sub>6</sub>, 100 MHz).

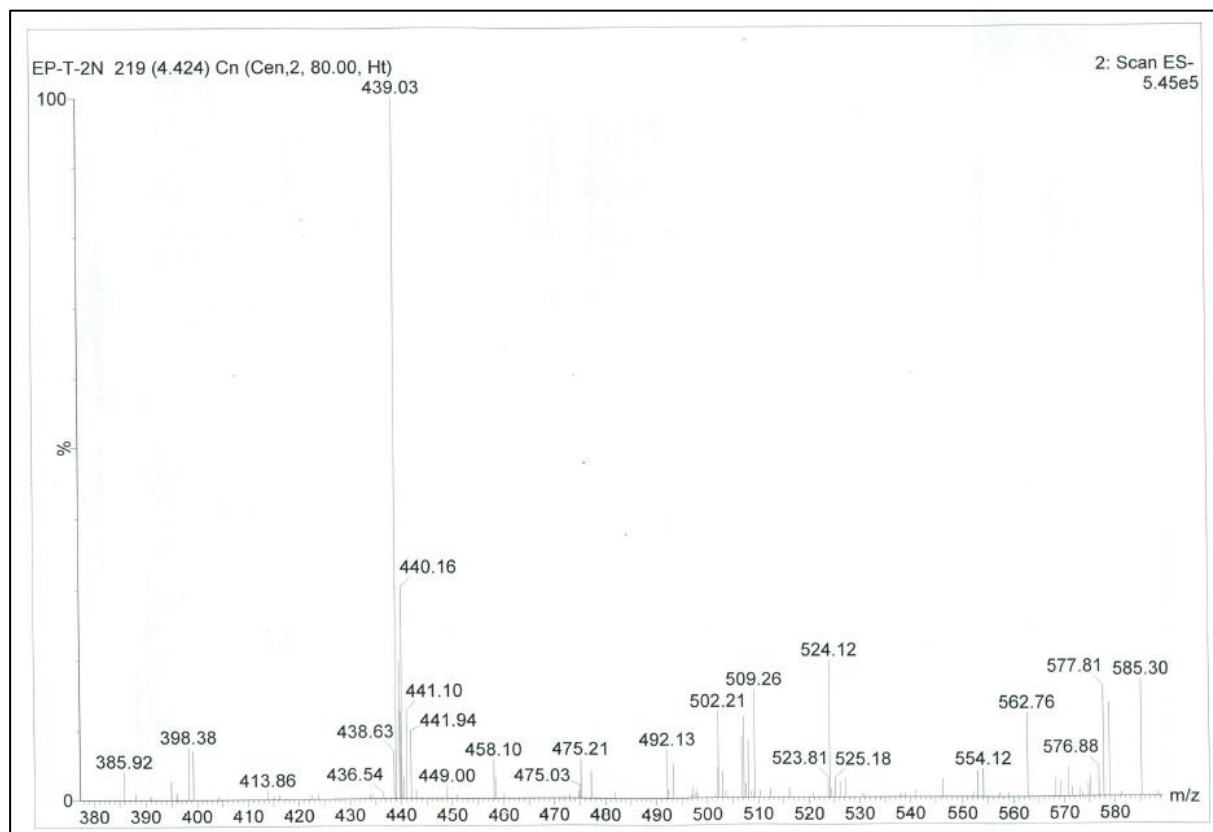

**Figure S67.** Compound **3r** ESI MS spectrum.

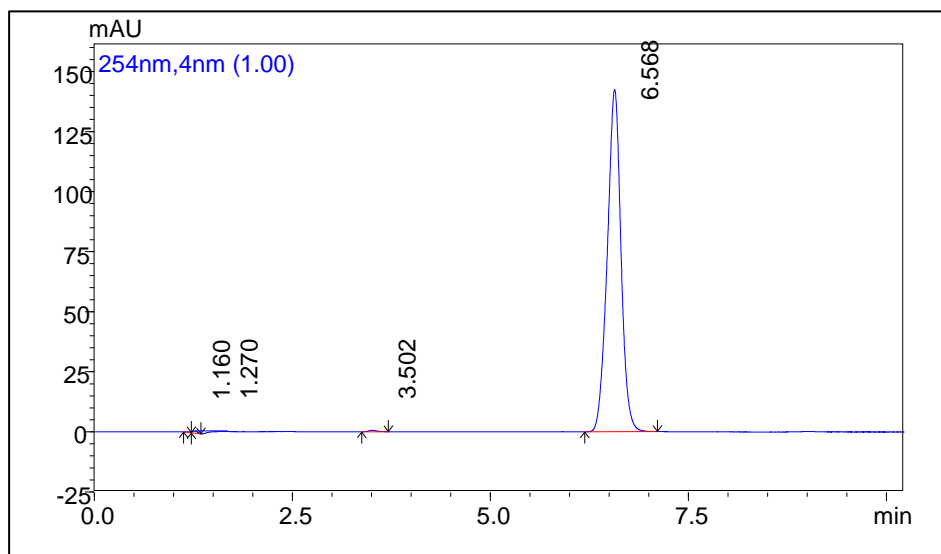

**Figure S68.** Chromatogram of compound **3r** (44 µg/mL) recorded under optimized conditions.

(*E*)-*N'*-[(3-Nitrophenyl)methylidene]-4-[(4-methylphenyl)sulfonyloxy]benzohydrazide (**3s**)

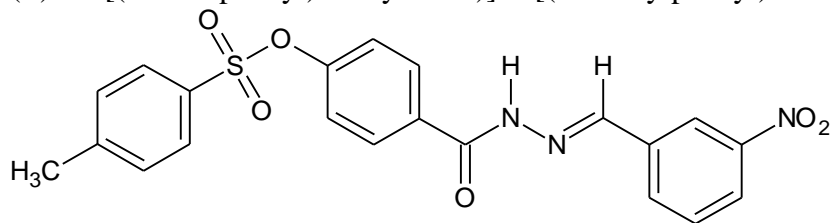

**Lab Code:** EP-T-3N

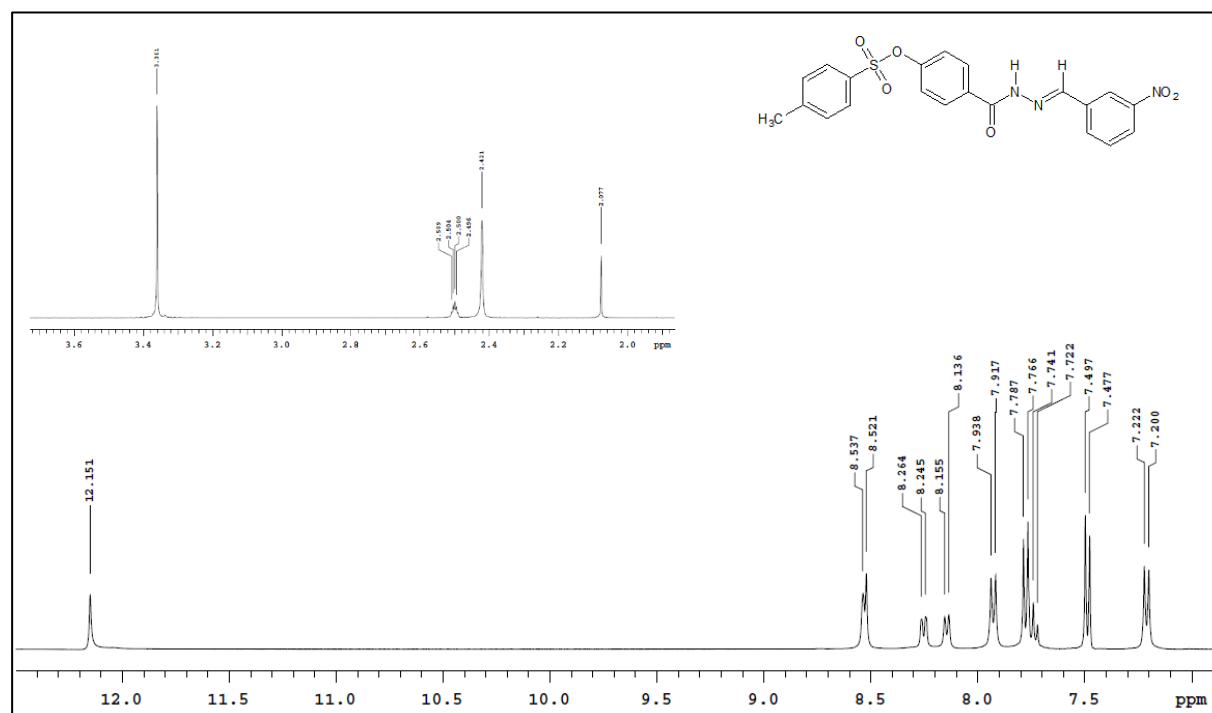

**Figure S69.** Compound **3s** <sup>1</sup>H-NMR spectrum (DMSO-d<sub>6</sub>, 400 MHz).

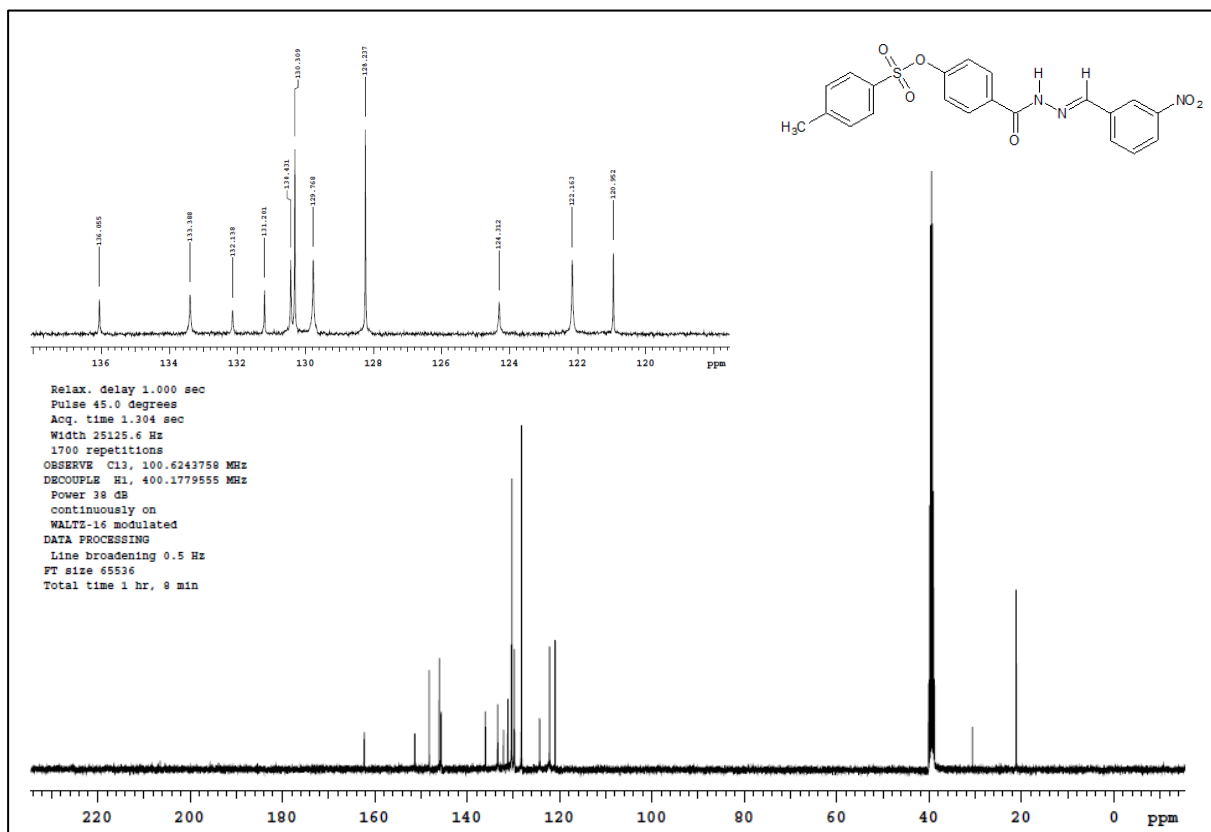

**Figure S70.** Compound 3s <sup>13</sup>C-NMR spectrum (DMSO-d<sub>6</sub>, 100 MHz).

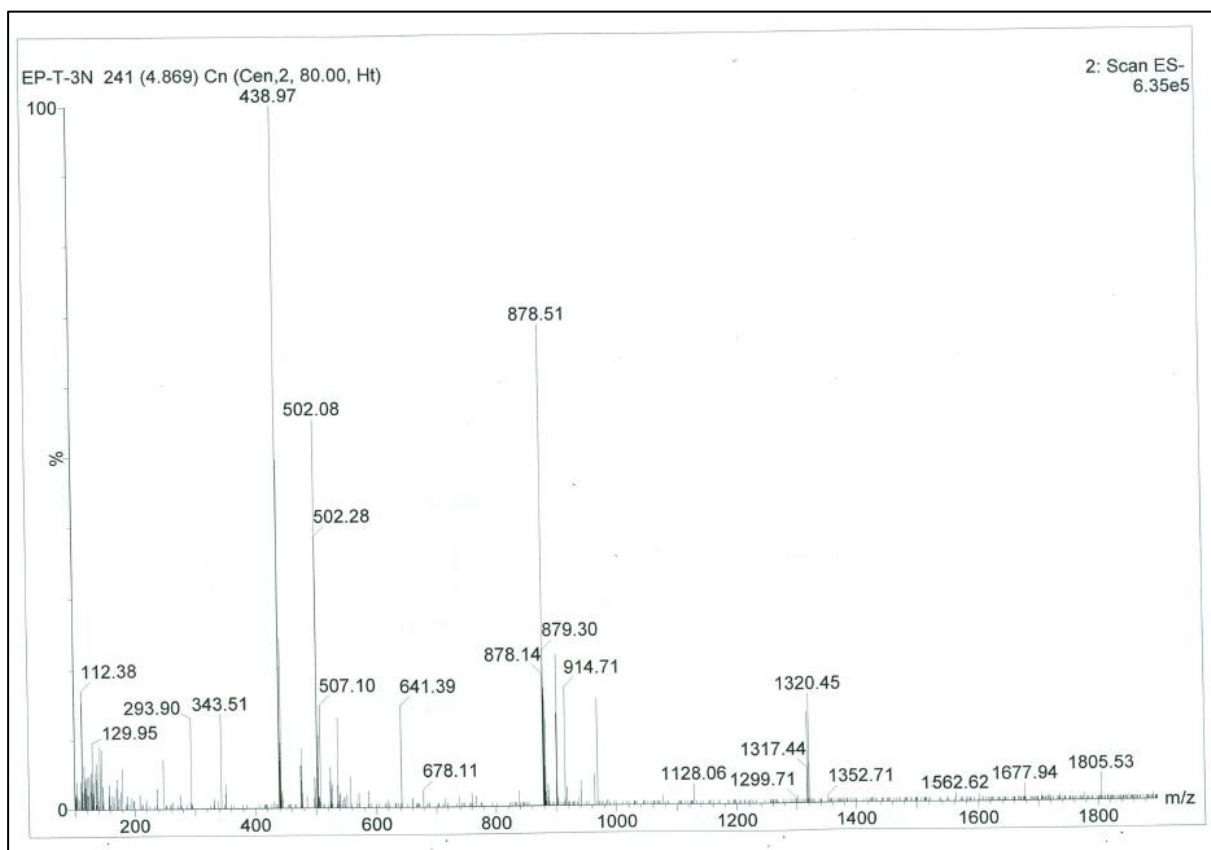

**Figure S71.** Compound 3s ESI MS spectrum.

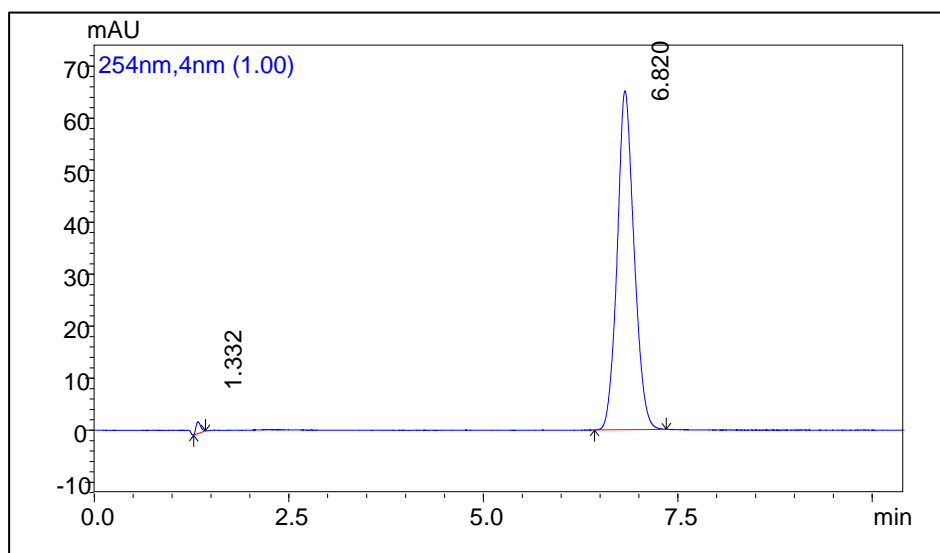

**Figure S72.** Chromatogram of compound **3s** (32  $\mu\text{g/mL}$ ) recorded under optimized conditions.

(*E*)-*N'*-[(4-Nitrophenyl)methylidene]-4-[(4-methylphenyl)sulfonyloxy]benzohydrazide (**3t**)

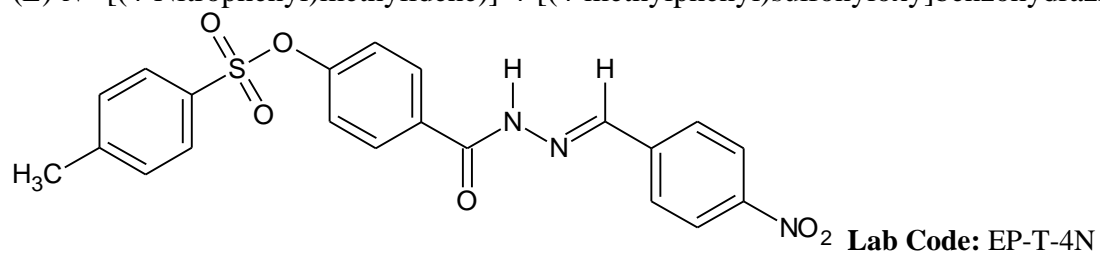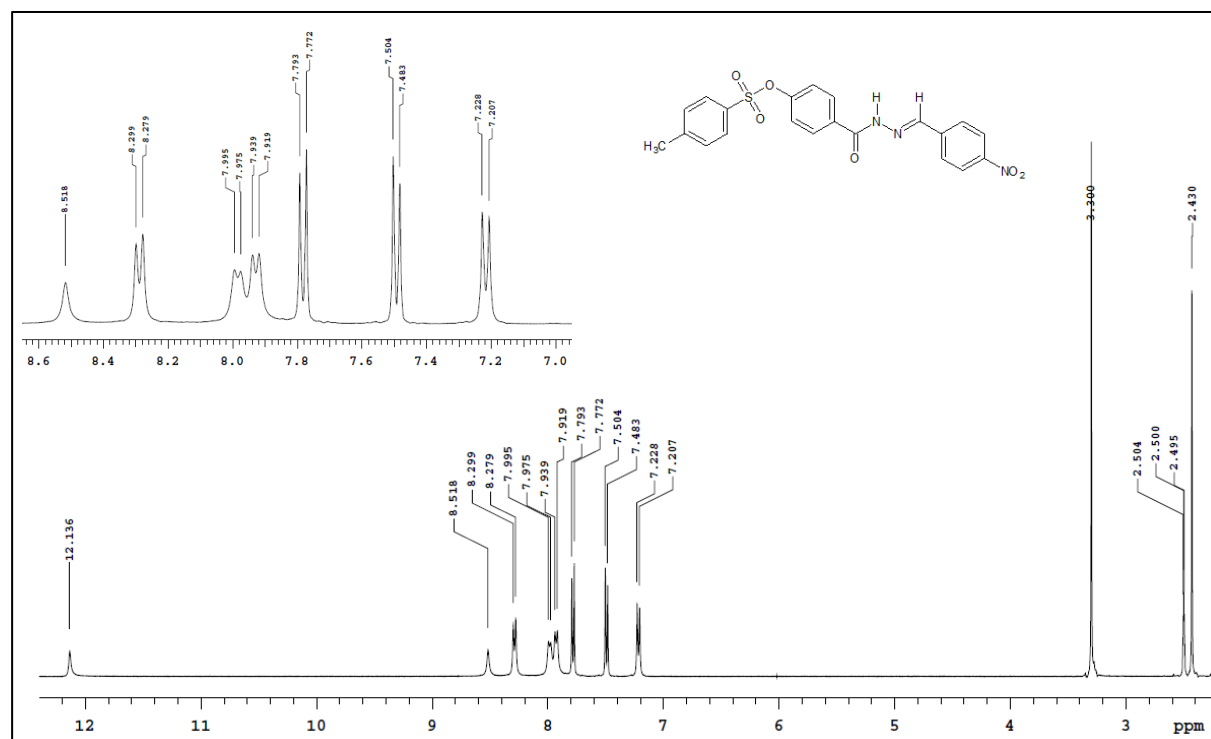

**Figure S73.** Compound **3t**  $^1\text{H}$ -NMR spectrum (DMSO- $d_6$ , 400 MHz).



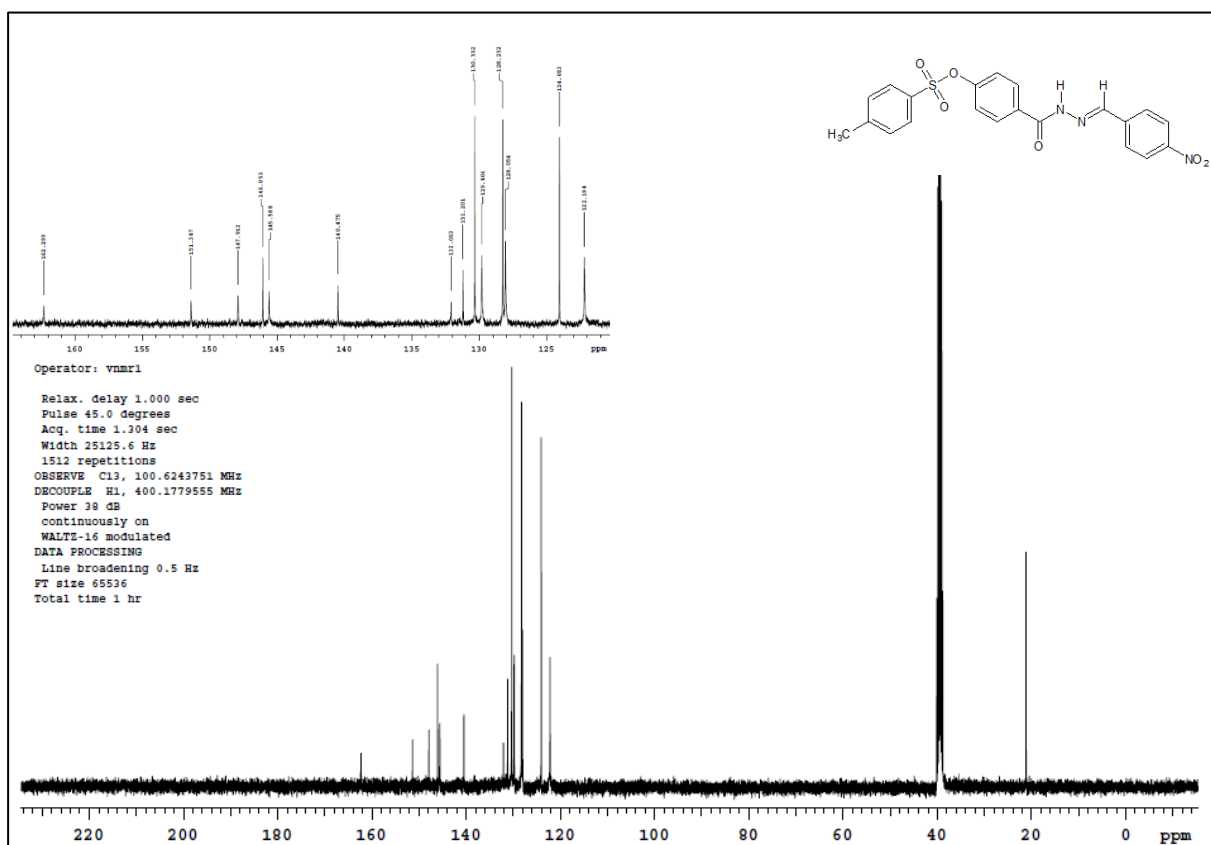

**Figure S74.** Compound **3t** <sup>13</sup>C-NMR spectrum (DMSO-d<sub>6</sub>, 100 MHz).

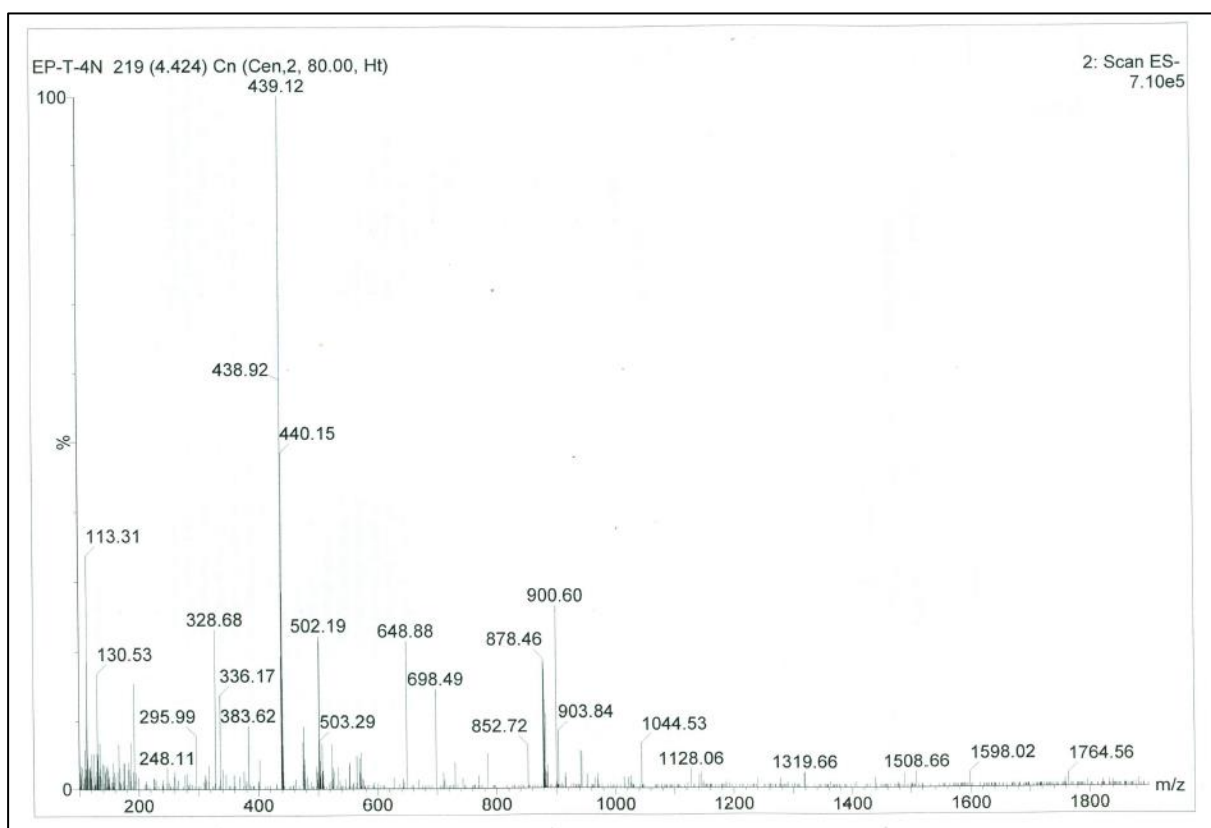

**Figure S75.** Compound **3t** ESI MS spectrum.

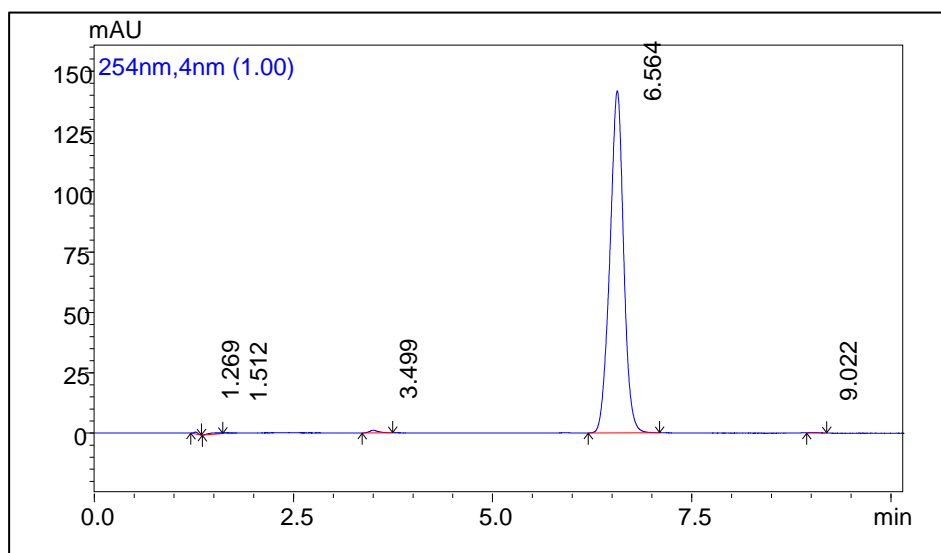

**Figure S76.** Chromatogram of compound **3t** (36  $\mu\text{g/mL}$ ) recorded under optimized conditions.
